# Supplementary material for: Prehabilitation in elective patients undergoing cardiac surgery: a randomised control trial (THE PrEPS TRIAL) – a study protocol
Source: PubMed Central journal article supplement — BMJ Open. 2023 Jan 5;13(1):e065992. doi: 10.1136/bmjopen-2022-065992 (PMC9827267; doi:10.1136/bmjopen-2022-065992), 2023-01-05
Supplement: bmjopen-2022-065992.draft_revisions.pdf [file bmjopen-2022-065992.draft_revisions.pdf]

# BMJ Open

BMJ Open is committed to open peer review. As part of this commitment we make the peer review history of every article we publish publicly available.

When an article is published we post the peer reviewers' comments and the authors' responses online. We also post the versions of the paper that were used during peer review. These are the versions that the peer review comments apply to.

The versions of the paper that follow are the versions that were submitted during the peer review process. They are not the versions of record or the final published versions. They should not be cited or distributed as the published version of this manuscript.

BMJ Open is an open access journal and the full, final, typeset and author-corrected version of record of the manuscript is available on our site with no access controls, subscription charges or pay-per-view fees (<http://bmjopen.bmj.com>).

If you have any questions on BMJ Open's open peer review process please email [info.bmjopen@bmj.com](mailto:info.bmjopen@bmj.com)

# BMJ Open

## PREHABILITATION IN ELECTIVE PATIENTS UNDERGOING CARDIAC SURGERY: A RANDOMISED CONTROL TRIAL (THE PrEPS TRIAL)

|                               |                                                                                                                                                                                                                                                                                                                                                                                                                                                                                                                                                                                                                                                                                                                                                                                 |
|-------------------------------|---------------------------------------------------------------------------------------------------------------------------------------------------------------------------------------------------------------------------------------------------------------------------------------------------------------------------------------------------------------------------------------------------------------------------------------------------------------------------------------------------------------------------------------------------------------------------------------------------------------------------------------------------------------------------------------------------------------------------------------------------------------------------------|
| Journal:                      | <i>BMJ Open</i>                                                                                                                                                                                                                                                                                                                                                                                                                                                                                                                                                                                                                                                                                                                                                                 |
| Manuscript ID                 | bmjopen-2022-065992                                                                                                                                                                                                                                                                                                                                                                                                                                                                                                                                                                                                                                                                                                                                                             |
| Article Type:                 | Protocol                                                                                                                                                                                                                                                                                                                                                                                                                                                                                                                                                                                                                                                                                                                                                                        |
| Date Submitted by the Author: | 23-Jun-2022                                                                                                                                                                                                                                                                                                                                                                                                                                                                                                                                                                                                                                                                                                                                                                     |
| Complete List of Authors:     | Akowuah, Enoch; South Tees Hospitals NHS Foundation Trust, James Cook Hospital<br>Mathias, Ayesha; Newcastle University,<br>Bardgett, Michelle; Newcastle University<br>Harrison, Samantha; Teesside University, Health & Social Care<br>Kasim, Adetayo; Durham University, Department of Anthropology<br>Loughran, Kirsti; Teesside University<br>Ogundimu, Emmanuel; University of Durham, Mathematical Sciences<br>Trevis, Jason; James Cook University Hospital, Cardiothoracic Surgery<br>Wagnild, Janelle; Durham University, Departmental of Anthropology<br>Witharana, Pasan; South Tees Hospitals NHS Foundation Trust<br>Hancock, Helen; Newcastle University, Newcastle Clinical Trials Unit<br>Maier, Rebecca; Newcastle University, Newcastle Clinical Trials Unit |
| Keywords:                     | Cardiac surgery < SURGERY, Adult cardiology < CARDIOLOGY,<br>Cardiology < INTERNAL MEDICINE                                                                                                                                                                                                                                                                                                                                                                                                                                                                                                                                                                                                                                                                                     |
|                               |                                                                                                                                                                                                                                                                                                                                                                                                                                                                                                                                                                                                                                                                                                                                                                                 |

SCHOLARONE™  
Manuscripts

# PREHABILITATION IN ELECTIVE PATIENTS UNDERGOING CARDIAC SURGERY: A RANDOMISED CONTROL TRIAL (THE PrEPS TRIAL)

## Designated Author/First Author for Correspondence:

Professor Enoch Akowuah

[enoch.akowuah@nhs.net](mailto:enoch.akowuah@nhs.net)

Dept of Cardiac Surgery

South Tees Hospitals NHS Foundation Trust

Marton Road

Middlesbrough

UK

TS4 3BS

## Co-Authors

1. Ayesha Mathias, Newcastle Clinical Trials Unit, Newcastle University, Newcastle Upon Tyne United Kingdom
2. Michelle Bardgett, Newcastle Clinical Trials Unit, Newcastle University, Newcastle Upon Tyne, United Kingdom
3. Samantha Harrison, Centre for Rehabilitation, School of Health and Life Sciences Teeside University, Middlesbrough, United Kingdom
4. Adetayo Kasim, Department of Anthropology, Durham University, Durham, United Kingdom
5. Kirsti Loughran, Centre for Rehabilitation, School of Health and Life Sciences, Teeside University, Middlesbrough, United Kingdom
6. Emmanuel Ogundimu, Department of Mathematical Sciences, Durham University, Durham, United Kingdom
7. Jason Trevis, Academic Cardiovascular Unit, South Tees NHS Foundation Trust, Middlesbrough, United Kingdom
8. Janelle Wagnild, Departmental of Anthropology, Durham University, Durham, United Kingdom
9. Pasan Witharana, Academic Cardiovascular Unit, South Tees NHS Foundation Trust, Middlesbrough, United Kingdom
10. Helen Hancock, Newcastle Clinical Trials Unit, Newcastle University, Newcastle Upon Tyne, United Kingdom
11. Rebecca Maier, Newcastle Clinical Trials Unit, Newcastle University, Newcastle Upon Tyne, United Kingdom

## Sponsor Contact

Joe Millar - [stees.dtvra@nhs.net](mailto:stees.dtvra@nhs.net)

James Cook University Hospital, South Tees NHS Foundation Trust, Middlesbrough, United Kingdom

Word Count – 4107

## Abstract

---

### Introduction

Prehabilitation prior to surgery has been shown to reduce postoperative complications, reduce length of hospital stay, and improve quality of life after cancer and limb reconstruction surgery. However, there is minimal data on the impact of prehabilitation in patients undergoing cardiac surgery, despite the fact these patients are generally older and have more comorbidities and frailty. This trial will assess the feasibility and impact of a prehabilitation intervention consisting of exercise and inspiratory muscle training on pre-operative functional exercise capacity in adult patients awaiting elective cardiac surgery, and determine any impact on clinical outcomes after surgery.

### Methods and Analysis

PrEPS is a randomised controlled single-centre trial recruiting 180 participants undergoing elective cardiac surgery. Participants will be randomised in a 1:1 ratio to standard pre-surgical care or standard care plus a prehabilitation intervention. The primary outcome will be change in functional exercise capacity measured as change in the 6 minute walk test distance from baseline. Secondary outcomes will evaluate the impact of prehabilitation on pre-operative and post-operative outcomes including; respiratory function, health related quality of life, anxiety and depression, frailty, and post-operative complications and resource use. This trial will evaluate if a prehabilitation intervention can improve pre-operative physical function, inspiratory muscle function, frailty, and quality of life prior to surgery in elective patients awaiting cardiac surgery, and impact post-operative outcomes.

### Ethics and Dissemination

A favourable opinion was given by the Sheffield Research Ethics Committee in 2019. Trial findings will be disseminated to patients, clinicians, commissioning groups and through peer reviewed publication.

### Trial registration

International Standard Randomised Controlled Trial Number 13860094. Registered on 24 October 2019

PROTOCOL V6.0 24 February 2022

## Article Summary

---

### Strengths and Limitations of this study

1. Largest pragmatic trial combining exercise and IMT for the first time in this population
2. Will establish if a prehab intervention is feasible and if it is effective in improving overall functional exercise capacity prior to surgery
3. Robust assessment of fidelity of the intervention and compliance
4. Important accelerometer sub study to explore change in activity levels and qualitative sub study to explore views and experiences of patients and staff
5. Limited to single centre but will provide critical safety data essential for wider implementation

### Keywords

---

Cardiac Surgery, Prehabilitation, Exercise, High-intensity Inspiratory Muscle Training (IMT)

### Introduction

---

Over 35,000 patients undergo cardiac surgery every year in the UK alone(1). Over the last decade the average age of these patients has increased worldwide, as has the prevalence of patients with multiple comorbidities having cardiac surgery(2). This has the potential to increase mortality, morbidity and resource use resulting from increasing rates of post-operative complications and associated prolonged use of hospital resources.

Prehabilitation programmes are fast becoming a method of being pro-active prior to surgery with the aim of reducing post-operative complications and mortality, giving patients themselves a method of managing their fitness pre-surgery; ultimately with the aim of speeding up recovery and return to normal function after surgery. A BMJ editorial in September 2017(3) highlighted the urgent need to recognise that the drive to improve outcomes after surgery must include optimising patients' health prior to surgery with evidence based prehabilitation programmes. It recognised that programs would have to be tailored for patients and specific interventions.

In cardiac surgery however, there have been few trials investigating the impact of prehabilitation. Primarily, concerns around safety due to delaying intervention to allow prehabilitation to occur and the impact of exercise as part of the intervention has contributed to a lack of trial data. This is despite evidence that exercise interventions can improve

1 cardiovascular function and fitness; an important predictor of mortality in older patients(4). Poor cardiovascular fitness  
2 is known to be associated with higher all-cause mortality(5).  
3

4 In patients awaiting cardiac surgery, the concern has been that severe coronary and valvular lesions e.g. severe aortic  
5 stenosis, cause symptoms with exercise and may precipitate complications. Furthermore patients are frequently told  
6 by their clinicians not to exercise whilst they wait for surgery. Moreover, severe aortic stenosis, left main stem stenosis,  
7 unstable angina, aortic aneurysms, and other cardiac condition are all contraindicated in most exercise and  
8 rehabilitation protocols currently used in the UK(6).  
9  
10  
11

12  
13 There is emerging evidence that patients with severe cardiac conditions can undergo exercise safely. The 6MWT was  
14 shown to be safe in a feasibility study of 244 patients with chronic lung or heart disease with no instances of adverse  
15 events(7). A trial in which low risk patients awaiting electives coronary artery bypass surgery underwent high-intensity  
16 treadmill training reported no significant adverse effects(8). However, neither of these trials included patients with  
17 severe cardiac conditions awaiting surgical intervention. A recent trial in patients with large abdominal aortic  
18 aneurysms awaiting repair has showed that even High Intensity Interval Training (HIIT) appeared to be safe and  
19 beneficial(9). These data have suggested that exercising patients awaiting cardiac surgery may be safe, therefore  
20 stimulating further interest in the role of exercise based prehabilitation prior to cardiac surgery.  
21  
22  
23  
24  
25  
26

27 Inspiratory muscle training (IMT) has the most evidence for improving outcomes after thoracic and cardiac surgery.  
28 This is most commonly achieved using inspiratory threshold-loading devices (threshold-IMT) which increase  
29 respiratory muscle strength and endurance, in turn improving respiratory volume and sputum clearance(10), thereby  
30 reducing postoperative pulmonary complications (PPCs). In cardiac surgery, preoperative IMT has been shown to  
31 reduce PPCs and have a modest effect on postoperative length of stay in high risk patients with pre-existing COPD  
32 after surgery(11). This finding has been confirmed in a number of systematic reviews and meta-analyses(12-14). A  
33 large multicentre trial funded by the NIHR (The INSPIRE Trial) to provide definitive evidence of benefit of IMT is  
34 currently ongoing.  
35  
36  
37  
38  
39  
40

41 To date no RCT has combined IMT with exercise in a prehabilitation intervention to determine the impact in patients  
42 undergoing cardiac surgery.  
43  
44

45 A trial is urgently needed to determine if patients with severe cardiac conditions can undergo prehabilitation safely  
46 prior to cardiac surgery. This was corroborated by a priority setting exercise conducted by The James Lind Alliance in  
47 the UK in 2019, to identify the top 10 research priorities for adult cardiac surgery research. In this Delphi style  
48 consensus exercise involving nearly 1000 patients and stakeholders, research to determine if prehabilitation benefited  
49 patients prior to cardiac surgery was the 4<sup>th</sup> most important of the ten priority research areas(15).  
50  
51  
52  
53

54 The PREPs trial will evaluate if a prehabilitation intervention consisting of exercise and inspiratory muscle training in  
55 patients awaiting elective cardiac surgery can improve pre-operative physical function, inspiratory muscle function,  
56 frailty, and quality of life prior to surgery. Other assessments include the impact of the intervention on post-operative  
57 clinical outcomes, speed of return to normal activity, patients' recovery from surgery and quality of life after surgery.  
58  
59  
60

## Methods/Analysis

---

### Trial design

A single site prospective, parallel group randomised controlled trial will be conducted to compare the effect of a prehabilitation intervention on functional, physical and clinical outcomes compared to standard care. Participants will be randomly allocated 1:1 to either standard care or the intervention. Participants allocated to standard care will receive routine pre-operative advice only. Participants allocated to the intervention will receive routine pre-operative advice and a prehabilitation intervention consisting of supervised cardiac exercise sessions, high intensity inspiratory muscle training and a home exercise programme.

Participants will be followed up at routine clinical appointments prior to surgery, during surgical admission, and at 6 and 12 weeks following index surgery (figure 1). After the intervention period all participants will continue with the site's standard pre- and post-operative care.

### Objectives

The Primary objective is to assess the impact of a pre-operative rehabilitation intervention (prehabilitation) on pre-operative functional exercise capacity (measured by change in the 6-minute walk test (6MWT)) from baseline in patients awaiting cardiac surgery.

The secondary objectives are to evaluate the impact of prehabilitation on outcomes including; respiratory function (measured by maximal inspiratory pressure (MIP)), health related quality of life (measured by the EQ-5D-5L), anxiety and depression (measured by the Hospital Anxiety and Depression Scale (HADS) and frailty (measured by grip strength) after the prehabilitation intervention.

The tertiary objectives are to evaluate the impact of prehabilitation on post-operative complication rates, including length of hospital stay, PPCs, and health related quality of life up to 12 weeks after surgery.

Two sub studies will also explore: the use of activity monitors to measure change in objectively measured physical activity from baseline to post-intervention, and the experiences of prehabilitation prior to elective cardiac surgery through the opinions of trial participants and the healthcare professionals responsible for prehabilitation delivery.

### Eligibility

Patients aged 18 and over listed for elective cardiac surgery under the care of the participating surgeons will be screened for eligibility. The exclusion criteria are: unstable angina leading to the need for urgent surgery, malignant arrhythmias, currently participating in another interventional clinical trial, known pregnancy, contraindications to exercise prehabilitation.

## Recruitment

Adults listed for elective cardiac surgery will be screened by the clinical team and given a patient information sheet (PIS) and letter of invitation prior to their routine clinic appointment. Eligibility will be confirmed by a clinician at the time of listing for surgery. Written informed consent will be obtained before any trial procedures are performed.

## Baseline Data Collection

Baseline assessments will be performed after consent and prior to randomisation. Women of childbearing potential will perform a pregnancy test to confirm pregnancy status before undertaking any further research activity. The baseline assessments will consist of the 6MWT, MIP, EQ5D5L questionnaire, activity monitoring (optional), HADS, Rockwood frailty score and hand grip strength. Participants' medical notes will be used to collect a full medical history, gender, height and weight, and date of birth/age. Participants consenting to take part in the 7 day activity monitoring sub study will be provided with an accelerometer, instructions on its use, and options for returning the accelerometer.

## Randomisation

Participants will be randomised in a 1:1 ratio to either the control arm (standard care only), or the intervention arm (standard care plus the prehabilitation intervention) using a 24-hour, central, secure, web-based system (SealedEnvelope™). Randomisation will be performed using a minimisation scheme that takes into account Rockwood frailty score, 6MWD, age and gender to balance baseline physical fitness between the arms. It will not be possible to conceal the allocation of treatment from the participant, or the team delivering the intervention and measuring the primary outcome. The surgeons performing the participants' cardiac surgery will not be informed of the allocation, however they will not be officially blinded.

## Outcome Measures

The primary outcome will be change in exercise capacity measured by the 6-minute walk test from baseline to pre-surgical assessment. This is a self-paced 6-minute walk recording the distance walked in metres around a 25 meter standardised track. All participants will receive standardised instruction and support(16). A pulse oximeter will be attached to the participant during the walk for continuous monitoring of oxygen saturations and heart rate. The test will be performed twice at baseline to account for a learning effect; the distance achieved on the two walks will be recorded and the highest value used for baseline measurement. The 6MWT will be repeated once at 6 and 12 weeks following index surgery to assess the post-operative impact of prehabilitation.

The secondary outcome measures in Table 1. will be collected at baseline, pre-surgical assessment, 6 and 12 weeks following index surgery.

| Secondary Outcomes                    | Measurement                        |
|---------------------------------------|------------------------------------|
| Change in Inspiratory muscle strength | Maximal inspiratory pressure (MIP) |



|                        |                                              |
|------------------------|----------------------------------------------|
| Frailty                | Hand Grip strength                           |
| Quality of life        | EQ-5D-5L                                     |
| Anxiety and Depression | Hospital Anxiety and Depression Scale (HADS) |

Table 1. Secondary outcome measures

Maximal inspiratory pressure (MIP) is used to measure inspiratory muscle strength and will be measured using a hand-held electronic transducer (POWERbreath KH2 (HaB Ltd UK), according to guidelines set out in the ATS/ERS statement of 2002(17).

Hand grip strength will be used as an objective measurement of frailty. Participants will be asked to grip a dynamometer (Jamar hydraulic hand dynamometer) as hard as they can using their dominant hand whilst being seated. The highest grip strength of 3 attempts will be recorded.

Two patient reported questionnaires will be collected; the EQ-5D-5L general health questionnaire(18) consists of five domains (mobility, self-care, usual activities, pain/discomfort, and anxiety/depression) and a standard vertical 20cm visual analogue scale (EQ-5D VAS) on a scale of 0 to 100 measuring current health-related quality of life. The health state of each participant, will be measured before and after the intervention period and post-surgery to determine any change in their health (gain or loss). The HADS self-reported questionnaire consists of 14 questions (7 for anxiety and 7 for depression) rated on a Likert-type scale from 0 to 3(19) and will be used to evaluate participants' mood.

In addition, surgical and post-operative data will be collected from participants' medical notes including: duration of operation, cardiopulmonary bypass times, time on ICU, and discharge information. Pulmonary and cardiac complications will be documented as outlined in Table 2.

| <b>Post-operative cardiac surgery complications</b>                                                                                                                                                                                                                              |                                                                                                                                                                                                                                                                                                                                                                                                                                                                                                             |
|----------------------------------------------------------------------------------------------------------------------------------------------------------------------------------------------------------------------------------------------------------------------------------|-------------------------------------------------------------------------------------------------------------------------------------------------------------------------------------------------------------------------------------------------------------------------------------------------------------------------------------------------------------------------------------------------------------------------------------------------------------------------------------------------------------|
| Renal failure/acute kidney injury, tracheostomy, delirium, TIA, stroke, new atrial fibrillation, RBC transfusion, blood product transfusion, cardiac arrest, myocardial infarction, all-cause mortality, infection (in-hospital only), or sepsis (6- and 12-week follow-up only) |                                                                                                                                                                                                                                                                                                                                                                                                                                                                                                             |
| <b>Pulmonary Complications</b>                                                                                                                                                                                                                                                   |                                                                                                                                                                                                                                                                                                                                                                                                                                                                                                             |
| Grade 1                                                                                                                                                                                                                                                                          | <ul style="list-style-type: none"> <li>• New onset purulent sputum or change in character of chronic sputum</li> <li>• Fever with no focus outside of the lungs</li> <li>• New rise in c-reactive protein or white blood cell count, positive blood culture</li> <li>• Atelectasis radiological finding or abnormal lung findings requiring non-invasive intervention</li> <li>• Hypoxaemia</li> <li>• Administration of additional post-operative antibiotics</li> <li>• Transtracheal aspirate</li> </ul> |
| Grade 2                                                                                                                                                                                                                                                                          | <ul style="list-style-type: none"> <li>• Pleural effusion needing drainage</li> <li>• Lung infection</li> <li>• Pneumothorax</li> <li>• Post-operative reintubation</li> <li>• Clinically significant atelectasis requiring tracheobronchial suction</li> </ul>                                                                                                                                                                                                                                             |
| Grade 3                                                                                                                                                                                                                                                                          | <ul style="list-style-type: none"> <li>• Ventilatory failure with postoperative ventilator dependence &gt;8h</li> <li>• Reintubation with a subsequent period of ventilation &gt;48h</li> </ul>                                                                                                                                                                                                                                                                                                             |

Table 2. Pulmonary Cardiac Complications

## Sub-studies

### *Accelerometer Sub-study*

Participants in both trial arms will be invited to take part in an accelerometer sub-study. Participants will wear an activity monitor on their non-dominant wrist for a continuous period of 7 days at baseline and after the intervention. Data collected will be used to explore change in activity levels (including time spent in MVPA, light physical activity and sedentary behaviour), change in moderate-to-vigorous physical activity and to compare activity levels between the control and intervention group. The correlation between 7 day activity monitor data and patient reported activity diaries pre and post intervention will also be explored.

### *Qualitative Sub-study*

Participants in both arms will be offered the opportunity to take part in a focus group exploring their experiences of the taking part in the PrEPS trial. Participants within the intervention and control arms of the trial will attend separate focus groups which will take place after the 12-week post-operative assessment to avoid interference with 12-week patient reported outcomes.

Focus groups will also take place with HCPs involved in the delivery of prehabilitation to explore their experiences of delivering the intervention as part of the PrEPS trial.

Focus group recordings will be transcribed verbatim and analysed using a deductive thematic analysis(20). Themes will be mapped against theoretical constructs of Normalisation Process Theory to highlight relationships and overlap between themes(21).

## Standard care

Participants randomised to the standard care group will continue with routine pre-operative care, consisting of specialist nurse review, meeting the surgeon and anaesthetist, and receiving information regarding preparation for surgery. Participants will be provided with a patient diary and asked to document any form of exercise that they carry out independently as well as healthcare visit details to aid collection of adverse events.

## Prehabilitation intervention

Participants randomised to the intervention group will receive standard care and a hospital based prehabilitation intervention consisting of an initial fitness assessment, a supervised exercise programme twice a week for 4 weeks, an unsupervised home exercise programme consisting of up to 45 mins of prescribed daily exercise and High Intensity-Inspiratory muscle training (HI-IMT) involving twice daily training for a duration of 4 weeks.

## Initial Assessment

At the first cardiac prehabilitation visit, participants will be assessed by a cardiac rehab specialist physiotherapist and nurse to gauge their physical fitness. This involves a subjective and objective assessment; table 3 details these assessments.

| Subjective Assessment |                                                                                  |
|-----------------------|----------------------------------------------------------------------------------|
| 1                     | General wellbeing                                                                |
| 2                     | Recent health issues and medical history                                         |
| 3                     | Fitness and activity levels                                                      |
| 4                     | Anxiety levels                                                                   |
| 5                     | Social circumstances and support                                                 |
| Objective Assessment  |                                                                                  |
| 1                     | HR and BP measurements                                                           |
| 2                     | ECG if indicated                                                                 |
| 3                     | Respiratory function (rate, breathing pattern and auscultation with stethoscope) |
| 4                     | Musculoskeletal system (joint range and muscle strength)                         |
| 5                     | Other physical problems                                                          |

Table 3. Participant initial assessments to gauge physical fitness

Participants will also be seen by a respiratory physiotherapist and instructed on how to carry out High Intensity-Inspiratory Muscle Training (HI-IMT). Participants will be given their own device (a POWERbreathe medic plus (HaB Ltd UK)) and an instruction leaflet/diary to use at home.

## Supervised exercise programme

The maximum HR and target HR will be calculated for each participant. Exercise intensity will be individually prescribed using the combined results of the initial fitness assessment and the baseline 6MWT. The physiotherapist will discuss the principles of the prescribed exercise with the participant and any precautions they should take to mitigate injury and illness. Participants will be encouraged to achieve a predicted target heart rate of 60 – 75% max and a moderate BORG score (12 or 13) during their cardiovascular exercise with actual figure achieved being recorded.

The cardiac prehabilitation exercise sessions will consist of 3 stages listed in table 4.

|         |                                                                                                                                                             |
|---------|-------------------------------------------------------------------------------------------------------------------------------------------------------------|
| Stage 1 | <ul style="list-style-type: none"> <li>15 minutes warm up consisting of preparatory stretches.</li> </ul>                                                   |
| Stage 2 | <ul style="list-style-type: none"> <li>Up to 25 minutes of cardiovascular (CV) exercise and resistance-based training with active recovery (AR).</li> </ul> |
| Stage 3 | <ul style="list-style-type: none"> <li>15 minute cool down period including maintenance stretches</li> </ul>                                                |

Table 4. Stages of Cardiac Prehabilitation Programme

### *Home exercise programme*

Participants will be asked to perform up to 45 minutes of exercise at home (unsupervised) up to 7 times a week during the 4-week intervention period. This exercise will be tailored to the individual participant's ability based upon their physical fitness assessment and their baseline 6MWT results. Progress will be discussed with the participant once a week during the prehabilitation classes. As this is unsupervised, the intensity will be lower than that prescribed for the supervised classes. Participants will be set achievable targets and have their exercise progressed if they have managed comfortably during the week as measured by their self-reported Borg scores and diaries.

### *High Intensity-Inspiratory Muscle Training (HI-IMT)*

Participants will be asked to perform HI-IMT twice a day for 4 weeks at home starting from their first supervised exercise session. Using their device, participants will be asked to breathe in as forcefully as possible before slowly breathing out 6 times, then rest, before performing another set of 6 breaths. There will be 6 sets of 6 breaths in each HI-IMT training session. The resting time between the sets starts at 60 seconds and decreases by 15 seconds after each set, ending with a rest period of five seconds before the final set.

The device will be set at 50% of their MIP. Participants will be shown how to increase or decrease the resistance on their device to train with a difficulty level of "somewhat hard", which is equivalent to a Borg score of 12 to 13. This will be highlighted in the instruction booklet/diary. Participants will have their HI-IMT technique checked once a week during their prehabilitation classes to ensure they are training effectively.

### *End of Intervention*

The end of the intervention is the final prehabilitation class. On completion of the 4-week intervention period participants will be encouraged to continue with home exercise and IMT independently until their day of surgery and document any activity in their patient diary.

### *Fidelity of the intervention*

The five domains of the treatment fidelity framework, provided by the National Institutes of Health's Behavioral Change Consort will be assessed to ensure fidelity of the prehabilitation intervention throughout the trial(22). Table 5 details these domains.

|   |                                                                                                                                                                                                                          |
|---|--------------------------------------------------------------------------------------------------------------------------------------------------------------------------------------------------------------------------|
| 1 | Study design issues will ensure the "treatment dose" in each condition is fixed                                                                                                                                          |
| 2 | Monitoring and improving the intervention will involve standardising the process by providing interventionists with a protocol                                                                                           |
| 3 | Fidelity of intervention delivery will involve a single observation of an exercise class to ensure delivery is per-protocol. A checklist will then be completed at 6 monthly intervals to ensure consistency in delivery |
| 4 | Receipt of treatment by patients (did they understand how to undergo the exercises)                                                                                                                                      |

|   |                                                                                                                                                                             |
|---|-----------------------------------------------------------------------------------------------------------------------------------------------------------------------------|
| 5 | Enactment of treatment skills by patients (e.g. did they engage in a home exercise program) will be assessed during focus groups conducted within the qualitative sub-study |
|---|-----------------------------------------------------------------------------------------------------------------------------------------------------------------------------|

Table 5. 5 Domains of the treatment fidelity framework in line with assessments to record fidelity

In addition to the above, self-monitoring data will be collected via exercise diaries.

### *Assessment of Compliance*

Self-reported patient diaries and prehabilitation attendance records will be used to measure adherence to the intervention. Participants will be considered to have adhered to the intervention if they attend  $\geq 50\%$  of the prehabilitation classes (at least 4 out of 8).

### Patient Public Involvement (PPI)

Patients and members of the public were involved in identifying prehabilitation in this population as a research priority and in design of the trial. Cardiac rehabilitation patients were consulted in the development of the prehabilitation intervention and relevant trial documentation. A patient representative is a member of the Trial Oversight Committee (TOC) to ensure PPI input throughout the entirety of the trial. Findings will also be disseminated to participants and relevant patient groups.

### End of trial

The end of the clinical trial is defined as the 12 week follow up of the last participant. Data queries will be addressed for a period of up to 3 months following this. Participants may choose to withdraw from the trial at any time. Clinicians may also choose to withdraw participants at any time for reasons including non-compliance, adverse events and pregnancy.

### Safety reporting

The safety of delivering a prehabilitation intervention a key outcome of the trial. Although there is now some evidence of a low risk to patient safety from studies where physical activity has been assessed in patients with cardiac and/or pulmonary conditions, there is no such evidence in patients with severe cardiac conditions awaiting cardiac surgery.

To mitigate any safety concerns of participants, clinician and other stakeholders, the trial is designed so that the most intensive exercise intervention will be carried out within a hospital setting. Lower intensity exercise will be prescribed at home after assessment each week by the trial team.

Adverse events and serious adverse events will be collected and monitored throughout the trial. Due to the nature of the study population identified expected adverse events including; angina, breathlessness, light-headedness, arrhythmia and fatigue.

1 The relationship between the intervention (prehabilitation) and the occurrence of each AE will be assessed and  
2 categorised by the Chief Investigator (or delegate). Serious events that are unexpected and related, will be reported  
3 to the REC committee within 15 days of notification.  
4

5  
6 It is crucial that safety is monitored throughout the trial so that any findings may be used in future trials, particularly  
7 when considering if this practice can be circulated across the wider community and out of hospitals settings.  
8  
9

## 11 Statistical analysis

---

14 Primary and secondary outcomes will be analysed following the intention-to-treat principle, with patients analysed  
15 according to randomisation regardless of whether they actually received or adhered to the allocated treatment. Per-  
16 protocol and as-treated analyses may be conducted as sensitivity and exploratory analyses. A full statistical analysis  
17 plan will be developed and agreed with the Trial Oversight Committee before data collection is completed. Data will  
18 be analysed at the end of the study; no interim outcome analyses are planned.  
19  
20  
21  
22

23 The primary analysis testing the impact of the cardiac prehabilitation programme on pre-operative functional exercise  
24 capacity (measured by 6MWD) will be based on a linear mixed-effects model accounting for baseline randomisation  
25 factors, except for baseline 6MWD which is explicitly incorporated in the model to calculate change from baseline. The  
26 model will account for intra-patient correlation using a random intercept model. Subgroup analyses conducted for the  
27 primary outcome will be pre-specified in the analysis plan. All continuous secondary outcomes will be analysed using  
28 the same approach as used for the primary outcome. All non-continuous data will be analysed in the same way, but  
29 with a generalised linear model using the appropriate distributional assumptions and link function. Descriptive analysis  
30 will be used to explore outcomes related to the feasibility of the trial. Analyses will be conducted using R statistical  
31 software.  
32  
33  
34  
35  
36  
37  
38  
39

## 40 Sample size

41 The sample size is based on detecting a significant improvement in 6MWD after the prehabilitation program compared  
42 with the 6MWD at baseline. We have assumed a minimal clinically important difference in 6MWD of 25m with a  
43 standard deviation of 56.5m for pre-operative participants(23). Based on detecting a medium effect size of 0.44, 164  
44 participants (82 in each group) will provide 80% power to detect a difference of 25 metres in the 6MWD. Adjusting  
45 for 10% missing data, 180 participants will be recruited for the trial.  
46  
47  
48  
49  
50

## 51 Data

52 Data will be entered at site onto an electronic case report form for each participant. The database will be hosted by  
53 Sealed Envelope© who abide by GDPR and are responsible for the security of the data contained within the database.  
54  
55

56 Data will be used according to the provision of GDPR, and applicable new regulations, and individuals will not be  
57 identifiable through any reports or publications that result from the trial. Quality control measures will ensure that all  
58  
59  
60

1 data are reliable and have been processed accurately at every stage of the study. Source Data Validations (SDV) will  
2 be undertaken by the Trial Management staff to optimise data quality for key data including primary/secondary  
3 outcome variables and SAE data.  
4

### 6 *Trial Oversight Committee*

8 An independent Trial Oversight Committee (TOC) will monitor data completion rates and safety reporting throughout  
9 the duration of the trial. Data collected in the trial will be used to support other research in the future, and may be  
10 shared anonymously with other researchers.  
11  
12  
13

## 15 **Ethics and Dissemination**

---

18 The PrEPS trial was granted a favourable opinion by the Yorkshire and Humber, Sheffield Research Ethics Committee on the  
19 25/10/2019 (19/YH/0317). Trial findings will be disseminated to patients using patient focused literature, visual aids and  
20 animated films via patient charities like Heart Valve Voice and the British Heart Foundation national PPI group.  
21 Dissemination to clinicians and professional stakeholders like commissioners will be through peer reviewed  
22 publication and conferences. Any changes to the protocol will be communicated to all relevant parties as per the HREC  
23 requirements.  
24  
25  
26  
27  
28  
29

## 31 **Discussion**

---

33 Prehabilitation in cardiac surgery has lagged behind that for other specialties, especially cancer surgery, abdominal  
34 general surgery and limb reconstruction surgery in the UK(24). This is despite the fact that large numbers of patients  
35 undergo cardiac surgery in the UK every year (around 35,000). Moreover, cardiac surgery patients in particular stand  
36 to benefit from a prehabilitation interventions because they tend to be older, mean age 67 years and increasing(1)  
37 and have a higher co-morbid burden (average Charlson score 2.1 vs 1.7) (GIRFT Programme National Specialty Report).  
38 In particular, they suffer from high levels of obesity, diabetes, coexisting lung disease and reduced mobility. The  
39 chronic nature of most cardiac conditions prior to reaching the point of surgical intervention and the fact that the  
40 cardiac disease process itself usually limits physical activity, means that patients awaiting cardiac surgery usually  
41 exhibit a high prevalence of frailty and loss of muscle mass and function, a condition usually referred to as  
42 sarcopenia(25-27).  
43  
44  
45  
46  
47  
48  
49

51 In 2019 our group published a review of 483 publications, of which 10 (including 4 metaanalysis and 6 RCTs) represented  
52 the best evidence to answer the clinical question 'does pre-habilitation improve outcomes in cardiac surgical  
53 patients?'(28). The RCTs were limited by small sample sizes (the smallest had a sample size of 15) and no trial  
54 combined physical activity and IMT (the 2 interventions with the largest evidence base of impact for outcomes) as  
55 components in the intervention. A subsequent systematic review which explored associations between objectively  
56  
57  
58  
59  
60

1 measured physical activity during the prehabilitation period and health-related outcomes across surgery types  
2 reported significant beneficial associations(29).  
3

4 The significant benefit of prehabilitation in other therapeutic areas and the scarcity of high quality evidence in cardiac  
5 surgery patients identifies an urgent need to provide further data in this area.  
6  
7

### 8 *Anticipated Impact*

9  
10  
11 This will be the largest ever RCT investigating the impact of a prehabilitation intervention composed of exercise and  
12 IMT in patients with severe cardiac disease awaiting elective cardiac surgery. The findings will establish if such an  
13 intervention is feasible and if it is effective in improving overall functional exercise capacity prior to surgery. It will also  
14 indicate if there are any impacts on clinical outcome after surgery.  
15  
16  
17

### 18 **Trial status**

19  
20  
21 The PrEPS trial opened to recruitment in November 2019, just prior to the start of the global pandemic. The  
22 restrictions imposed by the COVID-19 pandemic has had a significant impact on recruitment, elective cardiac surgery  
23 and the ability to deliver the prehabilitation intervention. Despite these challenges PrEPS continues to recruit patients  
24 and is projected complete follow up data collection by early 2023.  
25  
26  
27  
28

### 29 **Acknowledgements**

30  
31  
32 We would like to thank HRUK for their funding and on-going support of the PrEPS trial with an extension to ensure this  
33 clinically important trial is seen through to completion.  
34  
35

36  
37 The successful delivery of PrEPS would not have been possible without the support from the cardiac surgeons at the  
38 James Cook University Hospital (*Simon Kendall, Andrew Goodwin, Andrew Owens, Ralph White, Mazzy Kanani and Danai*  
39 *Karamanou*), Newcastle CTU and the cardiac research and rehab delivery teams (*Jon Pritchard, Jess Wigham, Carmen*  
40 *Neave, Karen Ainsworth, Lyn Whitehouse, Louise Sarginson and Fiona Bowe*).  
41  
42  
43  
44

### 45 **Author contributions**

46  
47 All authors meet the criteria for authorship stated in the Uniform Requirements for Manuscripts Submitted to  
48 Biomedical Journals (ICMJE). SPIRITreporting guidelines have been used when compiling this report(30).  
49  
50  
51

### 52 **Declaration of Competing Interests**

53  
54 There are no competing interests to declare.  
55  
56

### 57 **Funding Statement**

58  
59 The PrEPS trial is funded by Heart Research UK (RG2671/18/20) and Research Capacity Funding from South Tees NFH.  
60



1  
2  
3  
4  
5  
6  
7  
8  
9  
10  
11  
12  
13  
14  
15  
16  
17  
18  
19  
20  
21  
22  
23  
24  
25  
26  
27  
28  
29  
30  
31  
32  
33  
34  
35  
36  
37  
38  
39  
40  
41  
42  
43  
44  
45  
46  
47  
48  
49  
50  
51  
52  
53  
54  
55  
56  
57  
58  
59  
60

For peer review only

References:

1. Grant SWaJ, David P. National Cardiac Surgery Activity and Outcomes Report 2002-20162017.
2. Wang W, Bagshaw SM, Norris CM, Zibdawi R, Zibdawi M, MacArthur R, et al. Association between older age and outcome after cardiac surgery: a population-based cohort study. J Cardiothorac Surg. 2014;9:177.

3. Wynter-Blyth V, Moorthy K. Prehabilitation: preparing patients for surgery. *BMJ*. 2017;358:j3702.
4. Sui X, Laditka JN, Hardin JW, Blair SN. Estimated functional capacity predicts mortality in older adults. *J Am Geriatr Soc*. 2007;55(12):1940-7.
5. Mandsager K, Harb S, Cremer P, Phelan D, Nissen SE, Jaber W. Association of Cardiorespiratory Fitness With Long-term Mortality Among Adults Undergoing Exercise Treadmill Testing. *JAMA Netw Open*. 2018;1(6):e183605.
6. Group JJW. Guidelines for rehabilitation in patients with cardiovascular disease (JCS 2012). *Circ J*. 2014;78(8):2022-93.
7. Tueller C, Kern L, Azzola A, Baty F, Condrau S, Wiegand J, et al. Six-minute walk test enhanced by mobile telemetric cardiopulmonary monitoring. *Respiration*. 2010;80(5):410-8.
8. Argunova Y, Belik E, Gruzdeva O, Ivanov S, Pomeskina S, Barbarash O. Effects of Physical Prehabilitation on the Dynamics of the Markers of Endothelial Function in Patients Undergoing Elective Coronary Bypass Surgery. *J Pers Med*. 2022;12(3).
9. Boidin M, Gayda M, Henri C, Hayami D, Trachsel LD, Besnier F, et al. Effects of interval training on risk markers for arrhythmic death: a randomized controlled trial. *Clin Rehabil*. 2019;33(8):1320-30.
10. McCann M, Stamp N, Ngui A, Litton E. Cardiac Prehabilitation. *J Cardiothorac Vasc Anesth*. 2019;33(8):2255-65.
11. Hulzebos EH, Smit Y, Helders PP, van Meeteren NL. Preoperative physical therapy for elective cardiac surgery patients. *Cochrane Database Syst Rev*. 2012;11:CD010118.
12. Katsura M, Kuriyama A, Takeshima T, Fukuhara S, Furukawa TA. Preoperative inspiratory muscle training for postoperative pulmonary complications in adults undergoing cardiac and major abdominal surgery. *Cochrane Database Syst Rev*. 2015(10):CD010356.
13. Mans CM, Reeve JC, Elkins MR. Postoperative outcomes following preoperative inspiratory muscle training in patients undergoing cardiothoracic or upper abdominal surgery: a systematic review and meta analysis. *Clin Rehabil*. 2015;29(5):426-38.
14. Snowdon D, Haines TP, Skinner EH. Preoperative intervention reduces postoperative pulmonary complications but not length of stay in cardiac surgical patients: a systematic review. *J Physiother*. 2014;60(2):66-77.
15. Lai FY, Abbasciano RG, Tabberer B, Kumar T, Murphy GJ, Partnership SGotJLAHSPS. Identifying research priorities in cardiac surgery: a report from the James Lind Alliance Priority Setting Partnership in adult heart surgery. *BMJ Open*. 2020;10(9):e038001.

- 1 16. Laboratories ACoPSfCPF. ATS statement: guidelines for the six-minute walk test. *Am J Respir Crit Care Med*.  
2 2002;166(1):111-7.  
3
- 4 17. Society ATSER. ATS/ERS Statement on respiratory muscle testing. *Am J Respir Crit Care Med*.  
5 2002;166(4):518-624.  
6  
7
- 8 18. Brooks R. EuroQol: the current state of play. *Health Policy*. 1996;37(1):53-72.  
9
- 10 19. Zigmond AS, Snaith RP. The hospital anxiety and depression scale. *Acta Psychiatr Scand*. 1983;67(6):361-70.  
11
- 12 20. Braun V, Clarke V. Using thematic analysis in psychology. *Qualitative Research in Psychology*. 2006;3(2):77-  
13 101.  
14
- 15 21. May CR, Cummings A, Girling M, Bracher M, Mair FS, May CM, et al. Using Normalization Process Theory in  
16 feasibility studies and process evaluations of complex healthcare interventions: a systematic review. *Implement Sci*.  
17 2018;13(1):80.  
18
- 19 22. Bellg AJ, Borrelli B, Resnick B, Hecht J, Minicucci DS, Ory M, et al. Enhancing treatment fidelity in health  
20 behavior change studies: best practices and recommendations from the NIH Behavior Change Consortium. *Health*  
21 *Psychol*. 2004;23(5):443-51.  
22
- 23 23. Gremeaux V, Troisgros O, Benaïm S, Hannequin A, Laurent Y, Casillas JM, et al. Determining the minimal  
24 clinically important difference for the six-minute walk test and the 200-meter fast-walk test during cardiac  
25 rehabilitation program in coronary artery disease patients after acute coronary syndrome. *Arch Phys Med Rehabil*.  
26 2011;92(4):611-9.  
27
- 28 24. Prehabilitation for people with cancer2020.  
29
- 30 25. Joshi A, Mancini R, Probst S, Abikhzer G, Langlois Y, Morin JF, et al. Sarcopenia in cardiac surgery: Dual X-ray  
31 absorptiometry study from the McGill frailty registry. *Am Heart J*. 2021;239:52-8.  
32
- 33 26. Okamura H, Kimura N, Tanno K, Mieno M, Matsumoto H, Yamaguchi A, et al. How is preoperative sarcopenia  
34 assessed in patients undergoing heart valve surgery? *J Thorac Cardiovasc Surg*. 2019;157(4):e199-e200.  
35
- 36 27. Yuenyongchaiwat K, Kulchanarat C, Satdhabudha O. Sarcopenia in open heart surgery patients: A cohort  
37 study. *Heliyon*. 2020;6(12):e05759.  
38
- 39 28. Sandhu MS, Akowuah EF. Does prehabilitation improve outcomes in cardiac surgical patients? *Interact*  
40 *Cardiovasc Thorac Surg*. 2019;29(4):608-11.  
41
- 42 29. Wagnild JM, Akowuah E, Maier RH, Hancock HC, Kasim A. Impact of prehabilitation on objectively measured  
43 physical activity levels in elective surgery patients: a systematic review. *BMJ Open*. 2021;11(9):e049202.  
44  
45  
46  
47  
48  
49  
50  
51  
52  
53  
54  
55  
56  
57  
58  
59  
60

1  
2  
3  
4  
5  
6  
7  
8  
9  
10  
11  
12  
13  
14  
15  
16  
17  
18  
19  
20  
21  
22  
23  
24  
25  
26  
27  
28  
29  
30  
31  
32  
33  
34  
35  
36  
37  
38  
39  
40  
41  
42  
43  
44  
45  
46  
47  
48  
49  
50  
51  
52  
53  
54  
55  
56  
57  
58  
59  
60

30. Chan AW, Tetzlaff JM, Gøtzsche PC, Altman DG, Mann H, Berlin JA, et al. SPIRIT 2013 explanation and elaboration: guidance for protocols of clinical trials. *BMJ*. 2013;346:e7586.

**Figure 1. Consort Diagram to show research activity in the PrEPS trial** – this consort diagram depicts the stages throughout the trial from screening, randomisation, intervention and through the various follow up stages. A summary of what assessments are conducted is provided at each stage.

For peer review only

# PREHABILITATION IN ELECTIVE PATIENTS UNDERGOING CARDIAC SURGERY: A RANDOMISED CONTROL TRIAL (THE PrEPS TRIAL)

## Figures

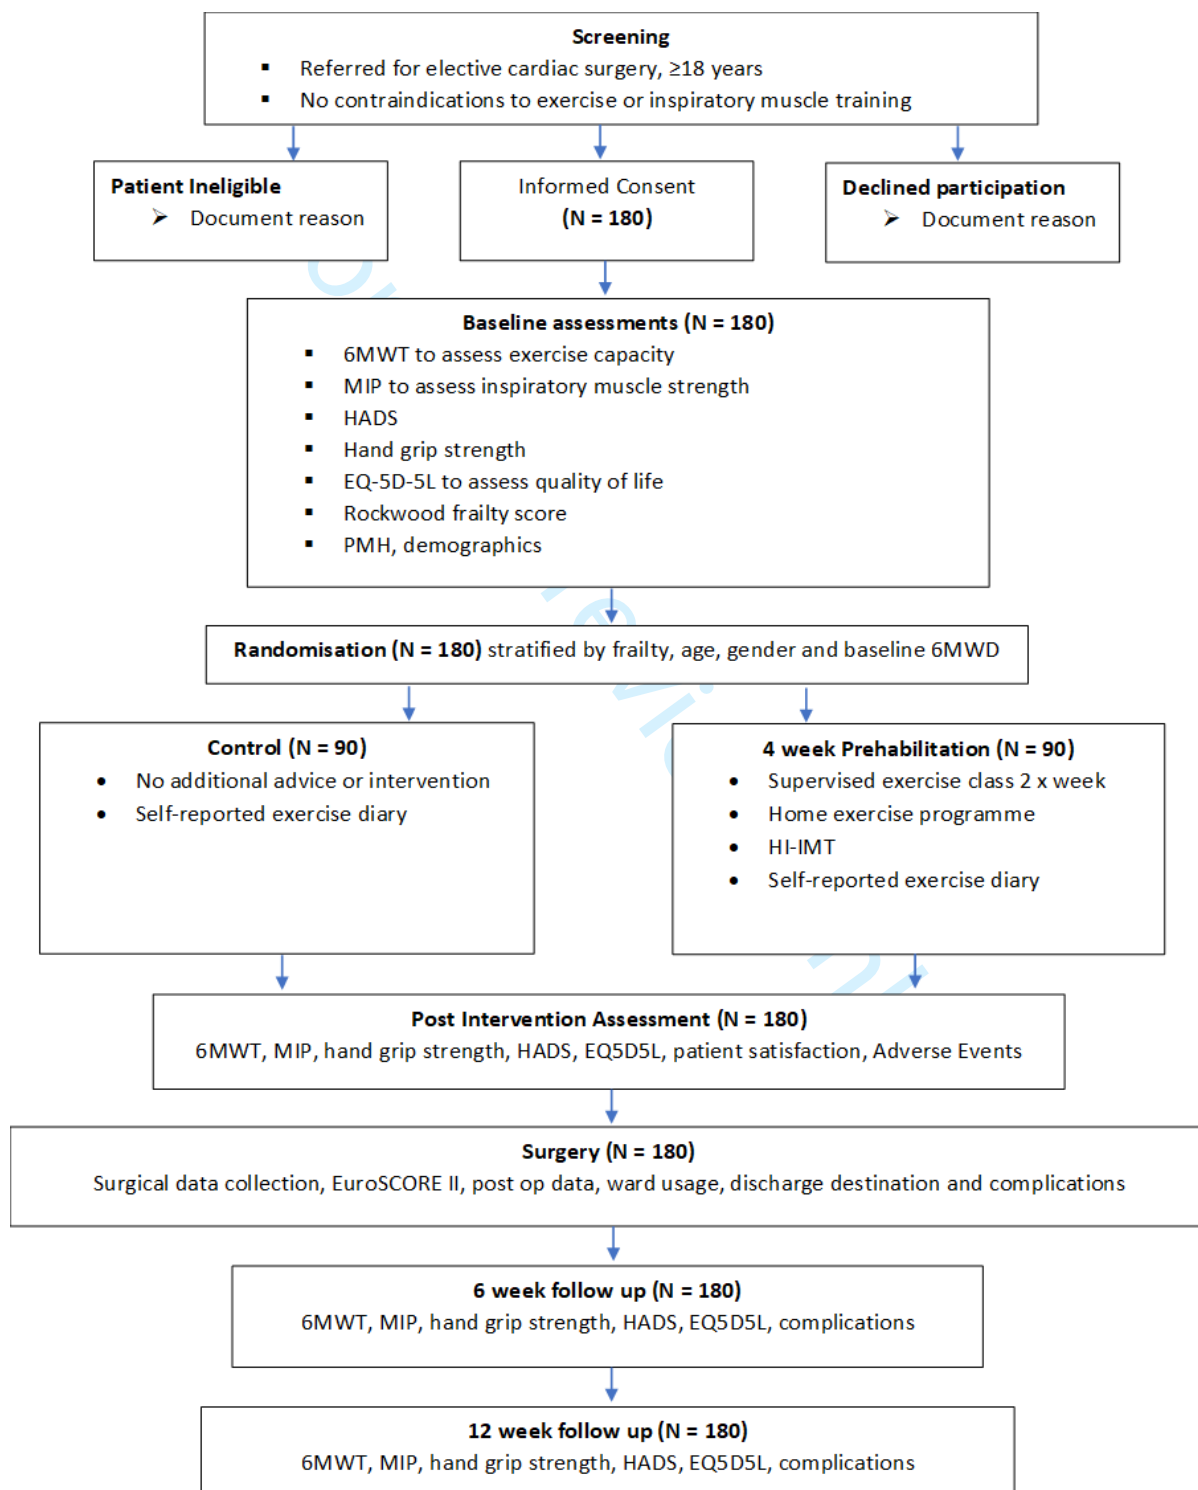

Figure 1. Consort Diagram to show research activity in the PrEPS trial

# Reporting checklist for protocol of a clinical trial.

Based on the SPIRIT guidelines.

## Instructions to authors

Complete this checklist by entering the page numbers from your manuscript where readers will find each of the items listed below.

Your article may not currently address all the items on the checklist. Please modify your text to include the missing information. If you are certain that an item does not apply, please write "n/a" and provide a short explanation.

Upload your completed checklist as an extra file when you submit to a journal.

In your methods section, say that you used the SPIRIT reporting guidelines, and cite them as:

Chan A-W, Tetzlaff JM, Gøtzsche PC, Altman DG, Mann H, Berlin J, Dickersin K, Hróbjartsson A, Schulz KF, Parulekar WR, Krleža-Jerić K, Laupacis A, Moher D. SPIRIT 2013 Explanation and Elaboration: Guidance for protocols of clinical trials. *BMJ*. 2013;346:e7586

|                                   | Reporting Item                                                                                                                  | Page Number |
|-----------------------------------|---------------------------------------------------------------------------------------------------------------------------------|-------------|
| <b>Administrative information</b> |                                                                                                                                 |             |
| Title                             | <a href="#">#1</a> Descriptive title identifying the study design, population, interventions, and, if applicable, trial acronym | Page 1      |

|    |                     |                     |                                                    |                    |
|----|---------------------|---------------------|----------------------------------------------------|--------------------|
| 1  | Trial registration  | <a href="#">#2a</a> | Trial identifier and registry name. If not yet     | Page 2             |
| 2  |                     |                     | registered, name of intended registry              |                    |
| 3  |                     |                     |                                                    |                    |
| 4  |                     |                     |                                                    |                    |
| 5  |                     |                     |                                                    |                    |
| 6  | Trial registration: | <a href="#">#2b</a> | All items from the World Health Organization       | Met across         |
| 7  |                     |                     |                                                    |                    |
| 8  | data set            |                     | Trial Registration Data Set                        | various pages      |
| 9  |                     |                     |                                                    |                    |
| 10 |                     |                     |                                                    |                    |
| 11 |                     |                     |                                                    | within manuscript. |
| 12 |                     |                     |                                                    |                    |
| 13 |                     |                     |                                                    |                    |
| 14 | Protocol version    | <a href="#">#3</a>  | Date and version identifier                        | Page 2             |
| 15 |                     |                     |                                                    |                    |
| 16 |                     |                     |                                                    |                    |
| 17 | Funding             | <a href="#">#4</a>  | Sources and types of financial, material, and      | Page 14            |
| 18 |                     |                     | other support                                      |                    |
| 19 |                     |                     |                                                    |                    |
| 20 |                     |                     |                                                    |                    |
| 21 |                     |                     |                                                    |                    |
| 22 | Roles and           | <a href="#">#5a</a> | Names, affiliations, and roles of protocol         | Page 1             |
| 23 |                     |                     |                                                    |                    |
| 24 | responsibilities:   |                     | contributors                                       |                    |
| 25 |                     |                     |                                                    |                    |
| 26 | contributorship     |                     |                                                    |                    |
| 27 |                     |                     |                                                    |                    |
| 28 |                     |                     |                                                    |                    |
| 29 |                     |                     |                                                    |                    |
| 30 | Roles and           | <a href="#">#5b</a> | Name and contact information for the trial         | Page 1             |
| 31 |                     |                     |                                                    |                    |
| 32 | responsibilities:   |                     | sponsor                                            |                    |
| 33 |                     |                     |                                                    |                    |
| 34 | sponsor contact     |                     |                                                    |                    |
| 35 |                     |                     |                                                    |                    |
| 36 | information         |                     |                                                    |                    |
| 37 |                     |                     |                                                    |                    |
| 38 |                     |                     |                                                    |                    |
| 39 |                     |                     |                                                    |                    |
| 40 | Roles and           | <a href="#">#5c</a> | Role of study sponsor and funders, if any, in      | Not included due   |
| 41 |                     |                     |                                                    |                    |
| 42 | responsibilities:   |                     | study design; collection, management, analysis,    | to word limit –    |
| 43 |                     |                     |                                                    |                    |
| 44 | sponsor and funder  |                     | and interpretation of data; writing of the report; | within protocol    |
| 45 |                     |                     |                                                    |                    |
| 46 |                     |                     |                                                    |                    |
| 47 |                     |                     | and the decision to submit the report for          | itself             |
| 48 |                     |                     |                                                    |                    |
| 49 |                     |                     | publication, including whether they will have      |                    |
| 50 |                     |                     |                                                    |                    |
| 51 |                     |                     | ultimate authority over any of these activities    |                    |
| 52 |                     |                     |                                                    |                    |
| 53 |                     |                     |                                                    |                    |
| 54 |                     |                     |                                                    |                    |
| 55 |                     |                     |                                                    |                    |
| 56 |                     |                     |                                                    |                    |
| 57 |                     |                     |                                                    |                    |
| 58 |                     |                     |                                                    |                    |
| 59 |                     |                     |                                                    |                    |
| 60 |                     |                     |                                                    |                    |

|    |                      |                     |                                                     |          |
|----|----------------------|---------------------|-----------------------------------------------------|----------|
| 1  | Roles and            | <a href="#">#5d</a> | Composition, roles, and responsibilities of the     | Page 10  |
| 2  |                      |                     |                                                     |          |
| 3  | responsibilities:    |                     | coordinating centre, steering committee, endpoint   |          |
| 4  |                      |                     |                                                     |          |
| 5  | committees           |                     | adjudication committee, data management team,       |          |
| 6  |                      |                     |                                                     |          |
| 7  |                      |                     | and other individuals or groups overseeing the      |          |
| 8  |                      |                     |                                                     |          |
| 9  |                      |                     | trial, if applicable (see Item 21a for data         |          |
| 10 |                      |                     |                                                     |          |
| 11 |                      |                     | monitoring committee)                               |          |
| 12 |                      |                     |                                                     |          |
| 13 |                      |                     |                                                     |          |
| 14 |                      |                     |                                                     |          |
| 15 | <b>Introduction</b>  |                     |                                                     |          |
| 16 |                      |                     |                                                     |          |
| 17 |                      |                     |                                                     |          |
| 18 | Background and       | <a href="#">#6a</a> | Description of research question and justification  | Page 3-4 |
| 19 |                      |                     |                                                     |          |
| 20 | rationale            |                     | for undertaking the trial, including summary of     |          |
| 21 |                      |                     |                                                     |          |
| 22 |                      |                     | relevant studies (published and unpublished)        |          |
| 23 |                      |                     |                                                     |          |
| 24 |                      |                     | examining benefits and harms for each               |          |
| 25 |                      |                     |                                                     |          |
| 26 |                      |                     | intervention                                        |          |
| 27 |                      |                     |                                                     |          |
| 28 |                      |                     |                                                     |          |
| 29 |                      |                     |                                                     |          |
| 30 |                      |                     |                                                     |          |
| 31 | Background and       | <a href="#">#6b</a> | Explanation for choice of comparators               | Page 3-4 |
| 32 |                      |                     |                                                     |          |
| 33 | rationale: choice of |                     |                                                     |          |
| 34 |                      |                     |                                                     |          |
| 35 | comparators          |                     |                                                     |          |
| 36 |                      |                     |                                                     |          |
| 37 |                      |                     |                                                     |          |
| 38 | Objectives           | <a href="#">#7</a>  | Specific objectives or hypotheses                   | Page 5   |
| 39 |                      |                     |                                                     |          |
| 40 |                      |                     |                                                     |          |
| 41 | Trial design         | <a href="#">#8</a>  | Description of trial design including type of trial | Page 4-5 |
| 42 |                      |                     |                                                     |          |
| 43 |                      |                     | (eg, parallel group, crossover, factorial, single   |          |
| 44 |                      |                     |                                                     |          |
| 45 |                      |                     | group), allocation ratio, and framework (eg,        |          |
| 46 |                      |                     |                                                     |          |
| 47 |                      |                     | superiority, equivalence, non-inferiority,          |          |
| 48 |                      |                     |                                                     |          |
| 49 |                      |                     | exploratory)                                        |          |
| 50 |                      |                     |                                                     |          |
| 51 |                      |                     |                                                     |          |
| 52 |                      |                     |                                                     |          |
| 53 |                      |                     |                                                     |          |
| 54 | <b>Methods:</b>      |                     |                                                     |          |
| 55 |                      |                     |                                                     |          |
| 56 | <b>Participants,</b> |                     |                                                     |          |
| 57 |                      |                     |                                                     |          |
| 58 |                      |                     |                                                     |          |
| 59 |                      |                     |                                                     |          |
| 60 |                      |                     |                                                     |          |



1 **interventions, and**

2  
3 **outcomes**

4  
5

|                                                          |                                    |                      |                                                                                                                                                                                                  |           |
|----------------------------------------------------------|------------------------------------|----------------------|--------------------------------------------------------------------------------------------------------------------------------------------------------------------------------------------------|-----------|
| 6<br>7<br>8<br>9<br>10<br>11<br>12<br>13<br>14           | Study setting                      | <a href="#">#9</a>   | Description of study settings (eg, community clinic, academic hospital) and list of countries where data will be collected. Reference to where list of study sites can be obtained               | Page 4-5  |
| 15<br>16<br>17<br>18<br>19<br>20<br>21<br>22<br>23<br>24 | Eligibility criteria               | <a href="#">#10</a>  | Inclusion and exclusion criteria for participants. If applicable, eligibility criteria for study centres and individuals who will perform the interventions (eg, surgeons, psychotherapists)     | Page 5    |
| 25<br>26<br>27<br>28<br>29<br>30<br>31<br>32             | Interventions:<br>description      | <a href="#">#11a</a> | Interventions for each group with sufficient detail to allow replication, including how and when they will be administered                                                                       | Page 8-10 |
| 33<br>34<br>35<br>36<br>37<br>38<br>39<br>40<br>41<br>42 | Interventions:<br>modifications    | <a href="#">#11b</a> | Criteria for discontinuing or modifying allocated interventions for a given trial participant (eg, drug dose change in response to harms, participant request, or improving / worsening disease) | Page 8-10 |
| 43<br>44<br>45<br>46<br>47<br>48<br>49<br>50<br>51<br>52 | Interventions:<br>adherence        | <a href="#">#11c</a> | Strategies to improve adherence to intervention protocols, and any procedures for monitoring adherence (eg, drug tablet return; laboratory tests)                                                | Page 8-10 |
| 53<br>54<br>55<br>56<br>57<br>58<br>59<br>60             | Interventions:<br>concomitant care | <a href="#">#11d</a> | Relevant concomitant care and interventions that are permitted or prohibited during the trial                                                                                                    | Page 8-10 |

|                                                                                                       |                      |                     |                                                                                                                                                                                                                                                                                                                                                                                |         |
|-------------------------------------------------------------------------------------------------------|----------------------|---------------------|--------------------------------------------------------------------------------------------------------------------------------------------------------------------------------------------------------------------------------------------------------------------------------------------------------------------------------------------------------------------------------|---------|
| 1<br>2<br>3<br>4<br>5<br>6<br>7<br>8<br>9<br>10<br>11<br>12<br>13<br>14<br>15<br>16<br>17<br>18<br>19 | Outcomes             | <a href="#">#12</a> | Primary, secondary, and other outcomes, including the specific measurement variable (eg, systolic blood pressure), analysis metric (eg, change from baseline, final value, time to event), method of aggregation (eg, median, proportion), and time point for each outcome. Explanation of the clinical relevance of chosen efficacy and harm outcomes is strongly recommended | Page 6  |
| 20<br>21<br>22<br>23<br>24<br>25<br>26<br>27<br>28<br>29<br>30<br>31                                  | Participant timeline | <a href="#">#13</a> | Time schedule of enrolment, interventions (including any run-ins and washouts), assessments, and visits for participants. A schematic diagram is highly recommended (see Figure)                                                                                                                                                                                               | Page 5  |
| 32<br>33<br>34<br>35<br>36<br>37<br>38<br>39<br>40<br>41<br>42<br>43                                  | Sample size          | <a href="#">#14</a> | Estimated number of participants needed to achieve study objectives and how it was determined, including clinical and statistical assumptions supporting any sample size calculations                                                                                                                                                                                          | Page 12 |
| 44<br>45<br>46<br>47<br>48<br>49                                                                      | Recruitment          | <a href="#">#15</a> | Strategies for achieving adequate participant enrolment to reach target sample size                                                                                                                                                                                                                                                                                            | Page 5  |

## Methods:

### Assignment of interventions (for controlled trials)

|    |                     |                      |                                                       |            |
|----|---------------------|----------------------|-------------------------------------------------------|------------|
| 1  | Allocation:         | <a href="#">#16a</a> | Method of generating the allocation sequence          | Page 11-12 |
| 2  |                     |                      |                                                       |            |
| 3  | sequence            |                      | (eg, computer-generated random numbers), and          |            |
| 4  |                     |                      |                                                       |            |
| 5  | generation          |                      | list of any factors for stratification. To reduce     |            |
| 6  |                     |                      |                                                       |            |
| 7  |                     |                      |                                                       |            |
| 8  |                     |                      | predictability of a random sequence, details of       |            |
| 9  |                     |                      |                                                       |            |
| 10 |                     |                      | any planned restriction (eg, blocking) should be      |            |
| 11 |                     |                      |                                                       |            |
| 12 |                     |                      | provided in a separate document that is               |            |
| 13 |                     |                      |                                                       |            |
| 14 |                     |                      |                                                       |            |
| 15 |                     |                      | unavailable to those who enrol participants or        |            |
| 16 |                     |                      |                                                       |            |
| 17 |                     |                      | assign interventions                                  |            |
| 18 |                     |                      |                                                       |            |
| 19 |                     |                      |                                                       |            |
| 20 | Allocation          | <a href="#">#16b</a> | Mechanism of implementing the allocation              | Page 11-12 |
| 21 |                     |                      |                                                       |            |
| 22 | concealment         |                      | sequence (eg, central telephone; sequentially         |            |
| 23 |                     |                      |                                                       |            |
| 24 | mechanism           |                      | numbered, opaque, sealed envelopes),                  |            |
| 25 |                     |                      |                                                       |            |
| 26 |                     |                      |                                                       |            |
| 27 |                     |                      | describing any steps to conceal the sequence          |            |
| 28 |                     |                      |                                                       |            |
| 29 |                     |                      | until interventions are assigned                      |            |
| 30 |                     |                      |                                                       |            |
| 31 |                     |                      |                                                       |            |
| 32 | Allocation:         | <a href="#">#16c</a> | Who will generate the allocation sequence, who        | Page 11-12 |
| 33 |                     |                      |                                                       |            |
| 34 | implementation      |                      | will enrol participants, and who will assign          |            |
| 35 |                     |                      |                                                       |            |
| 36 |                     |                      | participants to interventions                         |            |
| 37 |                     |                      |                                                       |            |
| 38 |                     |                      |                                                       |            |
| 39 |                     |                      |                                                       |            |
| 40 | Blinding (masking)  | <a href="#">#17a</a> | Who will be blinded after assignment to               | N/A        |
| 41 |                     |                      |                                                       |            |
| 42 |                     |                      | interventions (eg, trial participants, care           |            |
| 43 |                     |                      |                                                       |            |
| 44 |                     |                      | providers, outcome assessors, data analysts),         |            |
| 45 |                     |                      |                                                       |            |
| 46 |                     |                      |                                                       |            |
| 47 |                     |                      | and how                                               |            |
| 48 |                     |                      |                                                       |            |
| 49 |                     |                      |                                                       |            |
| 50 | Blinding (masking): | <a href="#">#17b</a> | If blinded, circumstances under which unblinding      | N/A        |
| 51 |                     |                      |                                                       |            |
| 52 | emergency           |                      | is permissible, and procedure for revealing a         |            |
| 53 |                     |                      |                                                       |            |
| 54 | unblinding          |                      | participant's allocated intervention during the trial |            |
| 55 |                     |                      |                                                       |            |
| 56 |                     |                      |                                                       |            |
| 57 |                     |                      |                                                       |            |
| 58 |                     |                      |                                                       |            |
| 59 |                     |                      |                                                       |            |
| 60 |                     |                      |                                                       |            |

1 **Methods: Data**  
 2  
 3 **collection,**  
 4  
 5 **management, and**  
 6  
 7 **analysis**  
 8  
 9

|    |                      |                      |                                                                     |
|----|----------------------|----------------------|---------------------------------------------------------------------|
| 10 |                      |                      |                                                                     |
| 11 | Data collection plan | <a href="#">#18a</a> | Plans for assessment and collection of outcome, Page 12             |
| 12 |                      |                      |                                                                     |
| 13 |                      |                      | baseline, and other trial data, including any                       |
| 14 |                      |                      |                                                                     |
| 15 |                      |                      | related processes to promote data quality (eg,                      |
| 16 |                      |                      |                                                                     |
| 17 |                      |                      | duplicate measurements, training of assessors)                      |
| 18 |                      |                      |                                                                     |
| 19 |                      |                      | and a description of study instruments (eg,                         |
| 20 |                      |                      |                                                                     |
| 21 |                      |                      | questionnaires, laboratory tests) along with their                  |
| 22 |                      |                      |                                                                     |
| 23 |                      |                      | reliability and validity, if known. Reference to                    |
| 24 |                      |                      |                                                                     |
| 25 |                      |                      | where data collection forms can be found, if not                    |
| 26 |                      |                      |                                                                     |
| 27 |                      |                      | in the protocol                                                     |
| 28 |                      |                      |                                                                     |
| 29 |                      |                      |                                                                     |
| 30 |                      |                      |                                                                     |
| 31 |                      |                      |                                                                     |
| 32 | Data collection      | <a href="#">#18b</a> | Plans to promote participant retention and In protocol – not        |
| 33 |                      |                      |                                                                     |
| 34 | plan: retention      |                      | complete follow-up, including list of any outcome included in paper |
| 35 |                      |                      |                                                                     |
| 36 |                      |                      | data to be collected for participants who due to word limit         |
| 37 |                      |                      |                                                                     |
| 38 |                      |                      | discontinue or deviate from intervention protocols                  |
| 39 |                      |                      |                                                                     |
| 40 |                      |                      |                                                                     |
| 41 |                      |                      |                                                                     |
| 42 | Data management      | <a href="#">#19</a>  | Plans for data entry, coding, security, and Page 12                 |
| 43 |                      |                      |                                                                     |
| 44 |                      |                      | storage, including any related processes to                         |
| 45 |                      |                      |                                                                     |
| 46 |                      |                      | promote data quality (eg, double data entry;                        |
| 47 |                      |                      |                                                                     |
| 48 |                      |                      | range checks for data values). Reference to                         |
| 49 |                      |                      |                                                                     |
| 50 |                      |                      | where details of data management procedures                         |
| 51 |                      |                      |                                                                     |
| 52 |                      |                      | can be found, if not in the protocol                                |
| 53 |                      |                      |                                                                     |
| 54 |                      |                      |                                                                     |
| 55 |                      |                      |                                                                     |
| 56 |                      |                      |                                                                     |
| 57 |                      |                      |                                                                     |
| 58 |                      |                      |                                                                     |
| 59 |                      |                      |                                                                     |
| 60 |                      |                      |                                                                     |

|    |                        |                      |                                                   |                    |
|----|------------------------|----------------------|---------------------------------------------------|--------------------|
| 1  | Statistics: outcomes   | <a href="#">#20a</a> | Statistical methods for analysing primary and     | Page 11            |
| 2  |                        |                      |                                                   |                    |
| 3  |                        |                      |                                                   |                    |
| 4  |                        |                      | secondary outcomes. Reference to where other      |                    |
| 5  |                        |                      |                                                   |                    |
| 6  |                        |                      | details of the statistical analysis plan can be   |                    |
| 7  |                        |                      |                                                   |                    |
| 8  |                        |                      | found, if not in the protocol                     |                    |
| 9  |                        |                      |                                                   |                    |
| 10 |                        |                      |                                                   |                    |
| 11 | Statistics: additional | <a href="#">#20b</a> | Methods for any additional analyses (eg,          | Page 7-8           |
| 12 |                        |                      |                                                   |                    |
| 13 | analyses               |                      | subgroup and adjusted analyses)                   |                    |
| 14 |                        |                      |                                                   |                    |
| 15 |                        |                      |                                                   |                    |
| 16 | Statistics: analysis   | <a href="#">#20c</a> | Definition of analysis population relating to     | Page 11            |
| 17 |                        |                      |                                                   |                    |
| 18 | population and         |                      | protocol non-adherence (eg, as randomised         |                    |
| 19 |                        |                      |                                                   |                    |
| 20 | missing data           |                      | analysis), and any statistical methods to handle  |                    |
| 21 |                        |                      |                                                   |                    |
| 22 |                        |                      | missing data (eg, multiple imputation)            |                    |
| 23 |                        |                      |                                                   |                    |
| 24 |                        |                      |                                                   |                    |
| 25 |                        |                      |                                                   |                    |
| 26 | <b>Methods:</b>        |                      |                                                   |                    |
| 27 |                        |                      |                                                   |                    |
| 28 | <b>Monitoring</b>      |                      |                                                   |                    |
| 29 |                        |                      |                                                   |                    |
| 30 |                        |                      |                                                   |                    |
| 31 |                        |                      |                                                   |                    |
| 32 | Data monitoring:       | <a href="#">#21a</a> | Composition of data monitoring committee          | N/A – Single Trial |
| 33 |                        |                      |                                                   |                    |
| 34 | formal committee       |                      | (DMC); summary of its role and reporting          | Oversight          |
| 35 |                        |                      |                                                   |                    |
| 36 |                        |                      | structure; statement of whether it is independent | Committee in       |
| 37 |                        |                      |                                                   |                    |
| 38 |                        |                      | from the sponsor and competing interests; and     | place –            |
| 39 |                        |                      |                                                   |                    |
| 40 |                        |                      | reference to where further details about its      | explanation in     |
| 41 |                        |                      |                                                   |                    |
| 42 |                        |                      | charter can be found, if not in the protocol.     | protocol           |
| 43 |                        |                      |                                                   |                    |
| 44 |                        |                      | Alternatively, an explanation of why a DMC is not |                    |
| 45 |                        |                      |                                                   |                    |
| 46 |                        |                      | needed                                            |                    |
| 47 |                        |                      |                                                   |                    |
| 48 |                        |                      |                                                   |                    |
| 49 |                        |                      |                                                   |                    |
| 50 |                        |                      |                                                   |                    |
| 51 | Data monitoring:       | <a href="#">#21b</a> | Description of any interim analyses and stopping  | N/A                |
| 52 |                        |                      |                                                   |                    |
| 53 | interim analysis       |                      | guidelines, including who will have access to     |                    |
| 54 |                        |                      |                                                   |                    |
| 55 |                        |                      | these interim results and make the final decision |                    |
| 56 |                        |                      |                                                   |                    |
| 57 |                        |                      | to terminate the trial                            |                    |
| 58 |                        |                      |                                                   |                    |
| 59 |                        |                      |                                                   |                    |
| 60 |                        |                      |                                                   |                    |

|    |                      |                      |                                                      |          |
|----|----------------------|----------------------|------------------------------------------------------|----------|
| 1  | Harms                | <a href="#">#22</a>  | Plans for collecting, assessing, reporting, and      | Page 11  |
| 2  |                      |                      | managing solicited and spontaneously reported        |          |
| 3  |                      |                      | adverse events and other unintended effects of       |          |
| 4  |                      |                      | trial interventions or trial conduct                 |          |
| 5  |                      |                      |                                                      |          |
| 6  |                      |                      |                                                      |          |
| 7  |                      |                      |                                                      |          |
| 8  |                      |                      |                                                      |          |
| 9  |                      |                      |                                                      |          |
| 10 |                      |                      |                                                      |          |
| 11 | Auditing             | <a href="#">#23</a>  | Frequency and procedures for auditing trial          | Page 12  |
| 12 |                      |                      | conduct, if any, and whether the process will be     |          |
| 13 |                      |                      | independent from investigators and the sponsor       |          |
| 14 |                      |                      |                                                      |          |
| 15 |                      |                      |                                                      |          |
| 16 |                      |                      |                                                      |          |
| 17 |                      |                      |                                                      |          |
| 18 |                      |                      |                                                      |          |
| 19 | <b>Ethics and</b>    |                      |                                                      |          |
| 20 |                      |                      |                                                      |          |
| 21 | <b>dissemination</b> |                      |                                                      |          |
| 22 |                      |                      |                                                      |          |
| 23 |                      |                      |                                                      |          |
| 24 | Research ethics      | <a href="#">#24</a>  | Plans for seeking research ethics committee /        | Page 12  |
| 25 |                      |                      | institutional review board (REC / IRB) approval      |          |
| 26 | approval             |                      |                                                      |          |
| 27 |                      |                      |                                                      |          |
| 28 |                      |                      |                                                      |          |
| 29 | Protocol             | <a href="#">#25</a>  | Plans for communicating important protocol           |          |
| 30 |                      |                      | modifications (eg, changes to eligibility criteria,  |          |
| 31 | amendments           |                      | outcomes, analyses) to relevant parties (eg,         |          |
| 32 |                      |                      | investigators, REC / IRBs, trial participants, trial |          |
| 33 |                      |                      | registries, journals, regulators)                    |          |
| 34 |                      |                      |                                                      |          |
| 35 |                      |                      |                                                      |          |
| 36 |                      |                      |                                                      |          |
| 37 |                      |                      |                                                      |          |
| 38 |                      |                      |                                                      |          |
| 39 |                      |                      |                                                      |          |
| 40 |                      |                      |                                                      |          |
| 41 |                      |                      |                                                      |          |
| 42 | Consent or assent    | <a href="#">#26a</a> | Who will obtain informed consent or assent from      | Page 5-6 |
| 43 |                      |                      | potential trial participants or authorised           |          |
| 44 |                      |                      | surrogates, and how (see Item 32)                    |          |
| 45 |                      |                      |                                                      |          |
| 46 |                      |                      |                                                      |          |
| 47 |                      |                      |                                                      |          |
| 48 |                      |                      |                                                      |          |
| 49 | Consent or assent:   | <a href="#">#26b</a> | Additional consent provisions for collection and     | N/A      |
| 50 |                      |                      | use of participant data and biological specimens     |          |
| 51 | ancillary studies    |                      | in ancillary studies, if applicable                  |          |
| 52 |                      |                      |                                                      |          |
| 53 |                      |                      |                                                      |          |
| 54 |                      |                      |                                                      |          |
| 55 |                      |                      |                                                      |          |
| 56 |                      |                      |                                                      |          |
| 57 |                      |                      |                                                      |          |
| 58 |                      |                      |                                                      |          |
| 59 |                      |                      |                                                      |          |
| 60 |                      |                      |                                                      |          |

|                                                                                                    |                                     |                      |                                                                                                                                                                                                                                                                                     |                                                      |
|----------------------------------------------------------------------------------------------------|-------------------------------------|----------------------|-------------------------------------------------------------------------------------------------------------------------------------------------------------------------------------------------------------------------------------------------------------------------------------|------------------------------------------------------|
| 1<br>2<br>3<br>4<br>5<br>6<br>7<br>8<br>9<br>10                                                    | Confidentiality                     | <a href="#">#27</a>  | How personal information about potential and enrolled participants will be collected, shared, and maintained in order to protect confidentiality before, during, and after the trial                                                                                                | Page 12                                              |
| 11<br>12<br>13<br>14<br>15<br>16<br>17<br>18                                                       | Declaration of interests            | <a href="#">#28</a>  | Financial and other competing interests for principal investigators for the overall trial and each study site                                                                                                                                                                       | Page 14                                              |
| 19<br>20<br>21<br>22<br>23<br>24<br>25<br>26<br>27<br>28                                           | Data access                         | <a href="#">#29</a>  | Statement of who will have access to the final trial dataset, and disclosure of contractual agreements that limit such access for investigators                                                                                                                                     | Page 12                                              |
| 29<br>30<br>31<br>32<br>33<br>34<br>35                                                             | Ancillary and post trial care       | <a href="#">#30</a>  | Provisions, if any, for ancillary and post-trial care, and for compensation to those who suffer harm from trial participation                                                                                                                                                       | Details in protocol – not in paper due to word count |
| 36<br>37<br>38<br>39<br>40<br>41<br>42<br>43<br>44<br>45<br>46<br>47<br>48<br>49<br>50<br>51<br>52 | Dissemination policy: trial results | <a href="#">#31a</a> | Plans for investigators and sponsor to communicate trial results to participants, healthcare professionals, the public, and other relevant groups (eg, via publication, reporting in results databases, or other data sharing arrangements), including any publication restrictions | Page 10 and 12                                       |
| 53<br>54<br>55<br>56<br>57<br>58<br>59<br>60                                                       | Dissemination policy: authorship    | <a href="#">#31b</a> | Authorship eligibility guidelines and any intended use of professional writers                                                                                                                                                                                                      | Page 13                                              |

1 Dissemination [#31c](#) Plans, if any, for granting public access to the full Page 13  
 2  
 3 policy: reproducible protocol, participant-level dataset, and statistical  
 4  
 5 research code  
 6  
 7

## 8 Appendices

9  
 10  
 11  
 12 Informed consent [#32](#) Model consent form and other related Not included  
 13  
 14 materials documentation given to participants and  
 15  
 16 authorised surrogates  
 17  
 18

19  
 20 Biological [#33](#) Plans for collection, laboratory evaluation, and N/A  
 21  
 22 specimens storage of biological specimens for genetic or  
 23  
 24 molecular analysis in the current trial and for  
 25  
 26 future use in ancillary studies, if applicable  
 27  
 28

29 None The SPIRIT Explanation and Elaboration paper is distributed under the terms of the Creative  
 30  
 31 Commons Attribution License CC-BY-NC. This checklist can be completed online using  
 32  
 33 <https://www.goodreports.org/>, a tool made by the [EQUATOR Network](#) in collaboration with  
 34  
 35 [Penelope.ai](#)  
 36  
 37  
 38  
 39  
 40  
 41  
 42  
 43  
 44  
 45  
 46  
 47  
 48  
 49  
 50  
 51  
 52  
 53  
 54  
 55  
 56  
 57  
 58  
 59  
 60



# BMJ Open

## PREHABILITATION IN ELECTIVE PATIENTS UNDERGOING CARDIAC SURGERY: A RANDOMISED CONTROL TRIAL (THE PrEPS TRIAL)

|                                 |                                                                                                                                                                                                                                                                                                                                                                                                                                                                                                                                                                                                                                                                                                                                                                                 |
|---------------------------------|---------------------------------------------------------------------------------------------------------------------------------------------------------------------------------------------------------------------------------------------------------------------------------------------------------------------------------------------------------------------------------------------------------------------------------------------------------------------------------------------------------------------------------------------------------------------------------------------------------------------------------------------------------------------------------------------------------------------------------------------------------------------------------|
| Journal:                        | <i>BMJ Open</i>                                                                                                                                                                                                                                                                                                                                                                                                                                                                                                                                                                                                                                                                                                                                                                 |
| Manuscript ID                   | bmjopen-2022-065992.R1                                                                                                                                                                                                                                                                                                                                                                                                                                                                                                                                                                                                                                                                                                                                                          |
| Article Type:                   | Protocol                                                                                                                                                                                                                                                                                                                                                                                                                                                                                                                                                                                                                                                                                                                                                                        |
| Date Submitted by the Author:   | 01-Nov-2022                                                                                                                                                                                                                                                                                                                                                                                                                                                                                                                                                                                                                                                                                                                                                                     |
| Complete List of Authors:       | Akowuah, Enoch; South Tees Hospitals NHS Foundation Trust, James Cook Hospital<br>Mathias, Ayesha; Newcastle University,<br>Bardgett, Michelle; Newcastle University<br>Harrison, Samantha; Teesside University, Health & Social Care<br>Kasim, Adetayo; Durham University, Department of Anthropology<br>Loughran, Kirsti; Teesside University<br>Ogundimu, Emmanuel; University of Durham, Mathematical Sciences<br>Trevis, Jason; James Cook University Hospital, Cardiothoracic Surgery<br>Wagnild, Janelle; Durham University, Departmental of Anthropology<br>Witharana, Pasan; South Tees Hospitals NHS Foundation Trust<br>Hancock, Helen; Newcastle University, Newcastle Clinical Trials Unit<br>Maier, Rebecca; Newcastle University, Newcastle Clinical Trials Unit |
| <b>Primary Subject Heading</b>: | Cardiovascular medicine                                                                                                                                                                                                                                                                                                                                                                                                                                                                                                                                                                                                                                                                                                                                                         |
| Secondary Subject Heading:      | Surgery                                                                                                                                                                                                                                                                                                                                                                                                                                                                                                                                                                                                                                                                                                                                                                         |
| Keywords:                       | Cardiac surgery < SURGERY, Adult cardiology < CARDIOLOGY, Cardiology < INTERNAL MEDICINE                                                                                                                                                                                                                                                                                                                                                                                                                                                                                                                                                                                                                                                                                        |
|                                 |                                                                                                                                                                                                                                                                                                                                                                                                                                                                                                                                                                                                                                                                                                                                                                                 |

SCHOLARONE™  
Manuscripts

# PREHABILITATION IN ELECTIVE PATIENTS UNDERGOING CARDIAC SURGERY: A RANDOMISED CONTROL TRIAL (THE PrEPS TRIAL) – A Study Protocol

## Designated Author/First Author for Correspondence:

Professor Enoch Akowuah

[enoch.akowuah@nhs.net](mailto:enoch.akowuah@nhs.net)

Dept of Cardiac Surgery

South Tees Hospitals NHS Foundation Trust

Marton Road

Middlesbrough

UK

TS4 3BS

## Co-Authors

1. Ayesha Mathias, Newcastle Clinical Trials Unit, Newcastle University, Newcastle Upon Tyne United Kingdom
2. Michelle Bardgett, Newcastle Clinical Trials Unit, Newcastle University, Newcastle Upon Tyne, United Kingdom
3. Samantha Harrison, Centre for Rehabilitation, School of Health and Life Sciences Teeside University, Middlesbrough, United Kingdom
4. Adetayo Kasim, Department of Anthropology, Durham University, Durham, United Kingdom
5. Kirsti Loughran, Centre for Rehabilitation, School of Health and Life Sciences, Teeside University, Middlesbrough, United Kingdom
6. Emmanuel Ogundimu, Department of Mathematical Sciences, Durham University, Durham, United Kingdom
7. Jason Trevis, Academic Cardiovascular Unit, South Tees NHS Foundation Trust, Middlesbrough, United Kingdom
8. Janelle Wagnild, Departmental of Anthropology, Durham University, Durham, United Kingdom
9. Pasan Witharana, Academic Cardiovascular Unit, South Tees NHS Foundation Trust, Middlesbrough, United Kingdom
10. Helen Hancock, Newcastle Clinical Trials Unit, Newcastle University, Newcastle Upon Tyne, United Kingdom
11. Rebecca Maier, Newcastle Clinical Trials Unit, Newcastle University, Newcastle Upon Tyne, United Kingdom

## Sponsor Contact

Joe Millar - [stees.dtvra@nhs.net](mailto:stees.dtvra@nhs.net)

James Cook University Hospital, South Tees NHS Foundation Trust, Middlesbrough, United Kingdom

Word Count – 4576

## Abstract

---

### Introduction

Prehabilitation prior to surgery has been shown to reduce postoperative complications, reduce length of hospital stay, and improve quality of life after cancer and limb reconstruction surgery. However, there is minimal data on the impact of prehabilitation in patients undergoing cardiac surgery, despite the fact these patients are generally older and have more comorbidities and frailty. This trial will assess the feasibility and impact of a prehabilitation intervention consisting of exercise and inspiratory muscle training on pre-operative functional exercise capacity in adult patients awaiting elective cardiac surgery, and determine any impact on clinical outcomes after surgery.

### Methods and Analysis

PrEPS is a randomised controlled single-centre trial recruiting 180 participants undergoing elective cardiac surgery. Participants will be randomised in a 1:1 ratio to standard pre-surgical care or standard care plus a prehabilitation intervention. The primary outcome will be change in functional exercise capacity measured as change in the 6 minute walk test distance from baseline. Secondary outcomes will evaluate the impact of prehabilitation on pre-operative and post-operative outcomes including; respiratory function, health related quality of life, anxiety and depression, frailty, and post-operative complications and resource use. This trial will evaluate if a prehabilitation intervention can improve pre-operative physical function, inspiratory muscle function, frailty, and quality of life prior to surgery in elective patients awaiting cardiac surgery, and impact post-operative outcomes.

### Ethics and Dissemination

A favourable opinion was given by the Sheffield Research Ethics Committee in 2019. Trial findings will be disseminated to patients, clinicians, commissioning groups and through peer reviewed publication.

### Trial registration

International Standard Randomised Controlled Trial Number 13860094. Registered on 24 October 2019

PROTOCOL V7.0 20 June 2022

## Article Summary

---

### Strengths and Limitations of this study

1. Largest pragmatic trial combining exercise and IMT for the first time in this population
2. Will establish if a prehab intervention is feasible and if it is effective in improving overall functional exercise capacity prior to surgery
3. Robust assessment of fidelity of the intervention and compliance
4. Important accelerometer sub study to explore change in activity levels and qualitative sub study to explore views and experiences of patients and staff
5. Limited to single centre but will provide critical safety data essential for wider implementation

### Keywords

---

Cardiac Surgery, Prehabilitation, Exercise, High-intensity Inspiratory Muscle Training (IMT)

### Introduction

---

Over 35,000 patients undergo cardiac surgery every year in the UK alone(1). Over the last decade the average age of these patients has increased worldwide, as has the prevalence of patients with multiple comorbidities having cardiac surgery(2). This has the potential to increase mortality, morbidity and resource use resulting from increasing rates of post-operative complications and associated prolonged use of hospital resources.

Prehabilitation programmes are fast becoming a method of being pro-active prior to surgery with the aim of reducing post-operative complications and mortality, giving patients themselves a method of managing their fitness pre-surgery; ultimately with the aim of speeding up recovery and return to normal function after surgery. A BMJ editorial in September 2017(3) highlighted the urgent need to recognise that the drive to improve outcomes after surgery must include optimising patients' health prior to surgery with evidence based prehabilitation programmes. It recognised that programs would have to be tailored for patients and specific interventions.

In cardiac surgery however, there have been few trials investigating the impact of prehabilitation. Primarily, concerns around safety due to delaying intervention to allow prehabilitation to occur and the impact of exercise as part of the intervention has contributed to a lack of trial data. This is despite evidence that exercise interventions can improve

1 cardiovascular function and fitness; an important predictor of mortality in older patients(4). Poor cardiovascular fitness  
2 is known to be associated with higher all-cause mortality(5).  
3

4 In patients awaiting cardiac surgery, the concern has been that severe coronary and valvular lesions e.g. severe aortic  
5 stenosis, cause symptoms with exercise and may precipitate complications. Furthermore patients are frequently told  
6 by their clinicians not to exercise whilst they wait for surgery. Moreover, severe aortic stenosis, left main stem stenosis,  
7 unstable angina, aortic aneurysms, and other cardiac condition are all contraindicated in most exercise and  
8 rehabilitation protocols currently used in the UK(6).  
9  
10

11 There is emerging evidence that patients with severe cardiac conditions can undergo exercise safely. The 6MWT was  
12 shown to be safe in a feasibility study of 244 patients with chronic lung or heart disease with no instances of adverse  
13 events(7). A trial in which low risk patients awaiting electives coronary artery bypass surgery underwent high-intensity  
14 treadmill training reported no significant adverse effects(8). However, neither of these trials included patients with  
15 severe cardiac conditions awaiting surgical intervention. A recent trial in patients with large abdominal aortic  
16 aneurysms awaiting repair has showed that even High Intensity Interval Training (HIIT) appeared to be safe and  
17 beneficial(9). These data have suggested that exercising patients awaiting cardiac surgery may be safe, therefore  
18 stimulating further interest in the role of exercise based prehabilitation prior to cardiac surgery.  
19  
20  
21  
22  
23  
24  
25  
26

27 Inspiratory muscle training (IMT) has the most evidence for improving outcomes after thoracic and cardiac surgery.  
28 This is most commonly achieved using inspiratory threshold-loading devices (threshold-IMT) which increase  
29 respiratory muscle strength and endurance, in turn improving respiratory volume and sputum clearance(10), thereby  
30 reducing postoperative pulmonary complications (PPCs). In cardiac surgery, preoperative IMT has been shown to  
31 reduce PPCs and have a modest effect on postoperative length of stay in high risk patients with pre-existing COPD  
32 after surgery(11). This finding has been confirmed in a number of systematic reviews and meta-analyses(12-14). A  
33 large multicentre trial funded by the NIHR (The INSPIRE Trial) to provide definitive evidence of benefit of IMT is  
34 currently ongoing.  
35  
36  
37  
38  
39  
40

41 To date no RCT has combined IMT with exercise in a prehabilitation intervention to determine the impact in patients  
42 undergoing cardiac surgery.  
43  
44

45 A trial is urgently needed to determine if patients with severe cardiac conditions can undergo prehabilitation safely  
46 prior to cardiac surgery. This was corroborated by a priority setting exercise conducted by The James Lind Alliance in  
47 the UK in 2019, to identify the top 10 research priorities for adult cardiac surgery research. In this Delphi style  
48 consensus exercise involving nearly 1000 patients and stakeholders, research to determine if prehabilitation benefited  
49 patients prior to cardiac surgery was the 4<sup>th</sup> most important of the ten priority research areas(15).  
50  
51  
52  
53

54 The PREPs trial will evaluate if a prehabilitation intervention consisting of exercise and inspiratory muscle training in  
55 patients awaiting elective cardiac surgery can improve pre-operative physical function, inspiratory muscle function,  
56 frailty, and quality of life prior to surgery. Other assessments include the impact of the intervention on post-operative  
57 clinical outcomes, speed of return to normal activity, patients' recovery from surgery and quality of life after surgery.  
58  
59  
60

# Methods/Analysis

---

## Trial design

A single centre prospective, parallel group randomised controlled trial will be conducted to compare the effect of a prehabilitation intervention on functional, physical and clinical outcomes compared to standard care. Participants will be randomly allocated 1:1 to either standard care or the intervention. Participants allocated to standard care will receive routine pre-operative advice only. Participants allocated to the intervention will receive routine pre-operative advice and a prehabilitation intervention consisting of supervised cardiac exercise sessions, high intensity inspiratory muscle training and a home exercise programme.

Participants will be followed up at routine clinical appointments prior to surgery, during surgical admission, and at 6 and 12 weeks following index surgery (figure 1). After the intervention period all participants will continue with the site's standard pre- and post-operative care.

## Objectives

The Primary objective is to assess the impact of a pre-operative rehabilitation intervention (prehabilitation) on pre-operative functional exercise capacity (measured by change in the 6-minute walk test (6MWT)) from baseline in patients awaiting cardiac surgery.

The secondary objectives are to evaluate the impact of prehabilitation on outcomes including; respiratory function (measured by maximal inspiratory pressure (MIP)), health related quality of life (measured by the EQ-5D-5L), anxiety and depression (measured by the Hospital Anxiety and Depression Scale (HADS) and frailty (measured by grip strength) after the prehabilitation intervention.

The tertiary objectives are to evaluate the impact of prehabilitation on post-operative complication rates, including length of hospital stay, PPCs, and health related quality of life up to 12 weeks after surgery.

Two sub studies will also explore: the use of activity monitors to measure change in objectively measured physical activity from baseline to post-intervention, and the experiences of prehabilitation prior to elective cardiac surgery through the opinions of trial participants and the healthcare professionals responsible for prehabilitation delivery.

## Eligibility

Patients aged 18 and over listed for elective cardiac surgery under the care of the participating surgeons will be screened for eligibility.

Table 1 describes the exclusion criteria in detail specific to the trial.

| Exclusion Criteria                                                                                                                                                                                                                                                                                                                                                                                                                                                                                                                                                             |
|--------------------------------------------------------------------------------------------------------------------------------------------------------------------------------------------------------------------------------------------------------------------------------------------------------------------------------------------------------------------------------------------------------------------------------------------------------------------------------------------------------------------------------------------------------------------------------|
| Unstable angina/indication for urgent surgery                                                                                                                                                                                                                                                                                                                                                                                                                                                                                                                                  |
| Malignant Arrhythmias                                                                                                                                                                                                                                                                                                                                                                                                                                                                                                                                                          |
| Currently Participating in another interventional clinical trial                                                                                                                                                                                                                                                                                                                                                                                                                                                                                                               |
| Known Pregnancy                                                                                                                                                                                                                                                                                                                                                                                                                                                                                                                                                                |
| Contraindications to known cardiac rehabilitations: <ul style="list-style-type: none"> <li>○ Acute systemic illness or fever</li> <li>○ Uncontrolled atrial or ventricular arrhythmias</li> <li>○ Uncontrolled sinus tachycardia (HR&gt;120 bpm)</li> <li>○ Aortic stenosis with pre-syncope/syncope</li> <li>○ Acute pericarditis or myocarditis</li> <li>○ Uncompensated HF</li> <li>○ Third degree (complete) atrioventricular (AV) block without pacemaker</li> <li>○ Recent embolism</li> <li>○ Severe Musculoskeletal conditions that would prohibit exercise</li> </ul> |
| Contraindications to inspiratory muscle training: <ul style="list-style-type: none"> <li>○ History of spontaneous pneumothorax/ incomplete recovery following traumatic pneumothorax</li> <li>○ Asthma patients who suffer from frequent, severe exacerbations</li> <li>○ Recently perforated ear drum (within last 3 months)</li> <li>○ Large Bullae</li> </ul>                                                                                                                                                                                                               |

Table 1 Exclusion Criteria

## Recruitment

Adults listed for elective cardiac surgery will be screened by the clinical team and given a patient information sheet (PIS) and letter of invitation prior to their routine clinic appointment. Eligibility will be confirmed by a clinician at the time of listing for surgery. Written informed consent will be obtained before any trial procedures are performed.

## Baseline Data Collection

Baseline assessments will be performed after consent and prior to randomisation. Women of childbearing potential will perform a pregnancy test to confirm pregnancy status before undertaking any further research activity. The baseline assessments will consist of the 6MWT, MIP, EQ5D5L questionnaire, activity monitoring (optional), HADS, Rockwood frailty score (9 point Clinical Frailty Scale (CFS)) and hand grip strength. Participants' medical notes will be used to collect a full medical history, gender, height and weight, and date of birth/age. Participants consenting to take part in the 7 day activity monitoring sub study will be provided with an accelerometer, instructions on its use, and options for returning the accelerometer.

## Randomisation

Participants will be randomised in a 1:1 ratio to either the control arm (standard care only), or the intervention arm (standard care plus the prehabilitation intervention) using a 24-hour, central, secure, web-based system (SealedEnvelope™). Randomisation will be performed using a minimisation scheme that takes into account Rockwood frailty score, 6MWD, age and gender to balance baseline physical fitness between the arms. It will not be possible to conceal the allocation of treatment from the participant, or the team delivering the intervention and measuring the primary outcome. The surgeons performing the participants' cardiac surgery will not be informed of the allocation, however they will not be officially blinded.

## Outcome Measures

The primary outcome will be change in exercise capacity measured by the 6-minute walk test from baseline to pre-surgical assessment. This is a self-paced 6-minute walk recording the distance walked in metres around a 25 meter standardised track.

This outcome was chosen because preoperative 6MWT distance is associated with moderate or severe complications after both non-cardiac surgery(16) and cardiac surgery(17). It has also been validated as an indicator of recovery in patients undergoing cardiac surgery(18).

All participants will receive standardised instruction and support(19). A pulse oximeter will be attached to the participant during the walk for continuous monitoring of oxygen saturations and heart rate. The test will be performed twice at baseline to account for a learning effect; the distance achieved on the two walks will be recorded and the highest value used for baseline measurement. The 6MWT will be repeated once at 6 and 12 weeks following index surgery to assess the post-operative impact of prehabilitation.

The secondary outcome measures in Table 2. will be collected at baseline, pre-surgical assessment, 6 and 12 weeks following index surgery.

| Secondary Outcomes                    | Measurement                                  |
|---------------------------------------|----------------------------------------------|
| Change in Inspiratory muscle strength | Maximal inspiratory pressure (MIP)           |
| Frailty                               | Hand Grip strength                           |
| Quality of life                       | EQ-5D-5L                                     |
| Anxiety and Depression                | Hospital Anxiety and Depression Scale (HADS) |

Table 2. Secondary outcome measures



Maximal inspiratory pressure (MIP) is used to measure inspiratory muscle strength and will be measured using a hand-held electronic transducer (POWERbreath KH2 (HaB Ltd UK), according to guidelines set out in the ATS/ERS statement of 2002(20).

Hand grip strength will be used as an objective measurement of frailty. Participants will be asked to grip a dynamometer (Jamar hydraulic hand dynamometer) as hard as they can using their dominant hand whilst being seated. The highest grip strength of 3 attempts will be recorded.

Two patient reported questionnaires will be collected; the EQ-5D-5L general health questionnaire(21) consists of five domains (mobility, self-care, usual activities, pain/discomfort, and anxiety/depression) and a standard vertical 20cm visual analogue scale (EQ-5D VAS) on a scale of 0 to 100 measuring current health-related quality of life. The health state of each participant, will be measured before and after the intervention period and post-surgery to determine any change in their health (gain or loss). The HADS self-reported questionnaire consists of 14 questions (7 for anxiety and 7 for depression) rated on a Likert-type scale from 0 to 3(22) and will be used to evaluate participants' mood.

In addition, surgical and post-operative data will be collected from participants' medical notes including: duration of operation, cardiopulmonary bypass times, time on ICU, and discharge information. Pulmonary and cardiac complications will be documented as outlined in Table 3.

| <b>Post-operative cardiac surgery complications</b>                                                                                                                                                                                                                              |                                                                                                                                                                                                                                                                                                                                                                                                                                                                                                             |
|----------------------------------------------------------------------------------------------------------------------------------------------------------------------------------------------------------------------------------------------------------------------------------|-------------------------------------------------------------------------------------------------------------------------------------------------------------------------------------------------------------------------------------------------------------------------------------------------------------------------------------------------------------------------------------------------------------------------------------------------------------------------------------------------------------|
| Renal failure/acute kidney injury, tracheostomy, delirium, TIA, stroke, new atrial fibrillation, RBC transfusion, blood product transfusion, cardiac arrest, myocardial infarction, all-cause mortality, infection (in-hospital only), or sepsis (6- and 12-week follow-up only) |                                                                                                                                                                                                                                                                                                                                                                                                                                                                                                             |
| <b>Pulmonary Complications</b>                                                                                                                                                                                                                                                   |                                                                                                                                                                                                                                                                                                                                                                                                                                                                                                             |
| Grade 1                                                                                                                                                                                                                                                                          | <ul style="list-style-type: none"> <li>• New onset purulent sputum or change in character of chronic sputum</li> <li>• Fever with no focus outside of the lungs</li> <li>• New rise in c-reactive protein or white blood cell count, positive blood culture</li> <li>• Atelectasis radiological finding or abnormal lung findings requiring non-invasive intervention</li> <li>• Hypoxaemia</li> <li>• Administration of additional post-operative antibiotics</li> <li>• Transtracheal aspirate</li> </ul> |
| Grade 2                                                                                                                                                                                                                                                                          | <ul style="list-style-type: none"> <li>• Pleural effusion needing drainage</li> <li>• Lung infection</li> <li>• Pneumothorax</li> <li>• Post-operative reintubation</li> <li>• Clinically significant atelectasis requiring tracheobronchial suction</li> </ul>                                                                                                                                                                                                                                             |
| Grade 3                                                                                                                                                                                                                                                                          | <ul style="list-style-type: none"> <li>• Ventilatory failure with postoperative ventilator dependence &gt;8h</li> <li>• Reintubation with a subsequent period of ventilation &gt;48h</li> </ul>                                                                                                                                                                                                                                                                                                             |

Table 3. Pulmonary Cardiac Complications

## Sub-studies

### *Accelerometer Sub-study*

Participants in both trial arms will be invited to take part in an accelerometer sub-study. We anticipate that 50-60% of the trial cohort will take part in the sub-study however this trial is ongoing and therefore this data is not yet available.

Participants will wear an activity monitor on their non-dominant wrist for a continuous period of 7 days at baseline and after the intervention period. Data collected will be processed using the GGIR package in R(23) to explore change in activity levels (including time spent in MVPA, light physical activity and sedentary behaviour), change in moderate-to-vigorous physical activity and between the control and intervention group. The correlation between 7 day activity monitor data and patient reported activity diaries pre and post intervention will also be explored.

### *Qualitative Sub-study*

Participants in both arms will be offered the opportunity to take part in a focus group exploring their experiences of the taking part in the PrEPS trial. Participants within the intervention and control arms of the trial will attend separate focus groups which will take place after the 12-week post-operative assessment to avoid interference with 12-week patient reported outcomes.

Focus groups will also take place with HCPs involved in the delivery of prehabilitation to explore their experiences of delivering the intervention as part of the PrEPS trial.

Focus group recordings will be transcribed verbatim and analysed using a deductive thematic analysis(24). Themes will be mapped against theoretical constructs of Normalisation Process Theory to highlight relationships and overlap between themes(25).

### Standard care

Participants randomised to the standard care group will continue with routine pre-operative care, consisting of specialist nurse review, meeting the surgeon and anaesthetist, and receiving information regarding preparation for surgery. Participants will be provided with a patient diary and asked to document any form of exercise that they carry out independently as well as healthcare visit details to aid collection of adverse events.

### Prehabilitation intervention

Participants randomised to the intervention group will receive standard care and a hospital based prehabilitation intervention consisting of an initial fitness assessment, a supervised exercise programme twice a week for 4 weeks, an unsupervised home exercise programme consisting of up to 45 mins of prescribed daily exercise and High Intensity-Inspiratory muscle training (HI-IMT) involving twice daily training for a duration of 4 weeks.

### *Initial Assessment*

At the first cardiac prehabilitation visit, participants will be assessed by a cardiac rehab specialist physiotherapist and nurse to gauge their physical fitness. This involves a subjective and objective assessment; table 4 details these assessments.

| Subjective Assessment |                   |
|-----------------------|-------------------|
| 1                     | General wellbeing |

|                             |                                                                                  |
|-----------------------------|----------------------------------------------------------------------------------|
| 2                           | Recent health issues and medical history                                         |
| 3                           | Fitness and activity levels                                                      |
| 4                           | Anxiety levels                                                                   |
| 5                           | Social circumstances and support                                                 |
| <b>Objective Assessment</b> |                                                                                  |
| 1                           | HR and BP measurements                                                           |
| 2                           | ECG if indicated                                                                 |
| 3                           | Respiratory function (rate, breathing pattern and auscultation with stethoscope) |
| 4                           | Musculoskeletal system (joint range and muscle strength)                         |
| 5                           | Other physical problems                                                          |

Table 4. Participant initial assessments to gauge physical fitness

Participants will also be seen by a respiratory physiotherapist and instructed on how to carry out High Intensity-Inspiratory Muscle Training (HI-IMT). Participants will be given their own device (a POWERbreathe medic plus (HaB Ltd UK)) and an instruction leaflet/diary to use at home.

### *Supervised exercise programme*

The maximum HR and target HR will be calculated for each participant. Exercise intensity will be individually prescribed using the combined results of the initial fitness assessment and the baseline 6MWT. The physiotherapist will discuss the principles of the prescribed exercise with the participant and any precautions they should take to mitigate injury and illness. Participants will be encouraged to achieve a predicted target heart rate of 60 – 75% max and a moderate BORG score (12 or 13) during their cardiovascular exercise with actual figure achieved being recorded.

The cardiac prehabilitation exercise sessions will consist of 3 stages listed in table 5.

|         |                                                                                                                                                               |
|---------|---------------------------------------------------------------------------------------------------------------------------------------------------------------|
| Stage 1 | <ul style="list-style-type: none"> <li>▪ 15 minutes warm up consisting of preparatory stretches.</li> </ul>                                                   |
| Stage 2 | <ul style="list-style-type: none"> <li>▪ Up to 25 minutes of cardiovascular (CV) exercise and resistance-based training with active recovery (AR).</li> </ul> |
| Stage 3 | <ul style="list-style-type: none"> <li>▪ 15 minute cool down period including maintenance stretches</li> </ul>                                                |

Table 5. Stages of Cardiac Prehabilitation Programme

### *Home exercise programme*

Participants will be asked to perform up to 45 minutes of exercise at home (unsupervised) up to 7 times a week during the 4-week intervention period. This exercise will be tailored to the individual participant's ability based upon their physical fitness assessment and their baseline 6MWT results. Progress will be discussed with the participant once a week during the prehabilitation classes. As this is unsupervised, the intensity will be lower than that prescribed for the supervised classes. Participants will be set achievable targets and have their exercise progressed if they have managed comfortably during the week as measured by their self-reported Borg scores and diaries.

## *High Intensity-Inspiratory Muscle Training (HI-IMT)*

Participants will be asked to perform HI-IMT twice a day for 4 weeks at home starting from their first supervised exercise session. Using their device, participants will be asked to breathe in as forcefully as possible before slowly breathing out 6 times, then rest, before performing another set of 6 breaths. There will be 6 sets of 6 breaths in each HI-IMT training session. The resting time between the sets starts at 60 seconds and decreases by 15 seconds after each set, ending with a rest period of five seconds before the final set.

The device will be set at 50% of their MIP. Participants will be shown how to increase or decrease the resistance on their device to train with a difficulty level of “somewhat hard”, which is equivalent to a Borg score of 12 to 13. This will be highlighted in the instruction booklet/diary. Participants will have their HI-IMT technique checked once a week during their prehabilitation classes to ensure they are training effectively.

## *End of Intervention*

The end of the intervention is the final prehabilitation class. On completion of the 4-week intervention period participants will be encouraged to continue with home exercise and IMT independently until their day of surgery and document any activity in their patient diary.

## *Fidelity of the intervention*

The five domains of the treatment fidelity framework, provided by the National Institutes of Health's Behavioral Change Consort will be assessed to ensure fidelity of the prehabilitation intervention throughout the trial(26). Table 6 details these domains.

|   |                                                                                                                                                                                                                          |
|---|--------------------------------------------------------------------------------------------------------------------------------------------------------------------------------------------------------------------------|
| 1 | Study design issues will ensure the “treatment dose” in each condition is fixed                                                                                                                                          |
| 2 | Monitoring and improving the intervention will involve standardising the process by providing interventionists with a protocol                                                                                           |
| 3 | Fidelity of intervention delivery will involve a single observation of an exercise class to ensure delivery is per-protocol. A checklist will then be completed at 6 monthly intervals to ensure consistency in delivery |
| 4 | Receipt of treatment by patients (did they understand how to undergo the exercises)                                                                                                                                      |
| 5 | Enactment of treatment skills by patients (e.g. did they engage in a home exercise program) will be assessed during focus groups conducted within the qualitative sub-study                                              |

Table 6. 5 Domains of the treatment fidelity framework in line with assessments to record fidelity

In addition to the above, self-monitoring data will be collected via exercise diaries.

## *Assessment of Compliance*

Self-reported patient diaries and prehabilitation attendance records will be used to measure adherence to the intervention. Adherence was defined as completing 50% of the supervised exercise classes (4 out of 8 sessions) in-line

1 with documented adherence rates to cardiac rehabilitation(27-29). Exercise diaries will capture the physical activity  
2 completion for the unsupervised component.  
3

## 4 Patient Public Involvement (PPI)

5  
6  
7 Patients and members of the public were involved in identifying prehabilitation in this population as a research priority  
8 and in design of the trial. Cardiac rehabilitation patients were consulted in the development of the prehabilitation  
9 intervention and relevant trial documentation. A patient representative is a member of the Trial Oversight Committee  
10 (TOC) to ensure PPI input throughout the entirety of the trial. Findings will also be disseminated to participants and  
11 relevant patient groups.  
12  
13  
14  
15

## 16 End of trial

17  
18  
19 The end of the clinical trial is defined as the 12 week follow up of the last participant. Data queries will be addressed  
20 for a period of up to 3 months following this. Participants may choose to withdraw from the trial at any time. Clinicians  
21 may also choose to withdraw participants at any time for reasons including non-compliance, adverse events and  
22 pregnancy.  
23  
24  
25

## 26 Safety reporting

27  
28  
29 The safety of delivering a prehabilitation intervention a key outcome of the trial. Although there is now some evidence  
30 of a low risk to patient safety from studies where physical activity has been assessed in patients with cardiac and/or  
31 pulmonary conditions, there is no such evidence in patients with severe cardiac conditions awaiting cardiac surgery.  
32

33  
34  
35 To mitigate any safety concerns of participants, clinician and other stakeholders, the trial is designed so that the most  
36 intensive exercise intervention will be carried out within a hospital setting. Lower intensity exercise will be prescribed  
37 at home after assessment each week by the trial team.  
38  
39

40  
41 Adverse events and serious adverse events will be collected and monitored throughout the trial. Due to the nature of  
42 the study population identified expected adverse events including; angina, breathlessness, light-headedness,  
43 arrhythmia and fatigue.  
44  
45

46  
47 The relationship between the intervention (prehabilitation) and the occurrence of each AE will be assessed and  
48 categorised by the Chief Investigator (or delegate). Serious events that are unexpected and related, will be reported  
49 to the REC committee within 15 days of notification.  
50  
51

52  
53 It is crucial that safety is monitored throughout the trial so that any findings may be used in future trials, particularly  
54 when considering if this practice can be circulated across the wider community and out of hospitals settings.  
55  
56  
57  
58  
59  
60

## Statistical analysis

---

Primary and secondary outcomes will be analysed following the intention-to-treat principle, with patients analysed according to randomisation regardless of whether they actually received or adhered to the allocated treatment. Per-protocol and as-treated analyses may be conducted as sensitivity and exploratory analyses. A full statistical analysis plan will be developed and agreed with the Trial Oversight Committee before data collection is completed. Data will be analysed at the end of the study; no interim outcome analyses are planned.

The primary analysis testing the impact of the cardiac prehabilitation programme on pre-operative functional exercise capacity (measured by 6MWD) will be based on a linear mixed-effects model accounting for baseline randomisation factors, except for baseline 6MWD which is explicitly incorporated in the model to calculate change from baseline. The model will account for intra-patient correlation using a random intercept model. Subgroup analyses conducted for the primary outcome will be pre-specified in the analysis plan. All continuous secondary outcomes will be analysed using the same approach as used for the primary outcome. All non-continuous data will be analysed in the same way, but with a generalised linear model using the appropriate distributional assumptions and link function. Descriptive analysis will be used to explore outcomes related to the feasibility of the trial. Analyses will be conducted using R statistical software.

## Sample size

The sample size is based on detecting a significant improvement in 6MWD after the prehabilitation program compared with the 6MWD at baseline. We have assumed a minimal clinically important difference in 6MWD of 25m with a standard deviation of 56.5m for pre-operative participants(30). Based on detecting a medium effect size of 0.44, 164 participants (82 in each group) will provide 80% power to detect a difference of 25 metres in the 6MWD. Adjusting for 10% missing data, 180 participants will be recruited for the trial.

## Data

Data will be entered at site onto an electronic case report form for each participant. The database will be hosted by Sealed Envelope© who abide by GDPR and are responsible for the security of the data contained within the database.

Data will be used according to the provision of GDPR, and applicable new regulations, and individuals will not be identifiable through any reports or publications that result from the trial. Quality control measures will ensure that all data are reliable and have been processed accurately at every stage of the study. Source Data Validations (SDV) will be undertaken by the Trial Management staff to optimise data quality for key data including primary/secondary outcome variables and SAE data.

## *Trial Oversight Committee*

An independent Trial Oversight Committee (TOC) will monitor data completion rates and safety reporting throughout the duration of the trial. Data collected in the trial will be used to support other research in the future, and may be shared anonymously with other researchers.

## Ethics and Dissemination

---

The PrEPS trial was granted a favourable opinion by the Yorkshire and Humber, Sheffield Research Ethics Committee on the 25/10/2019 (19/YH/0317). Trial findings will be disseminated to patients using patients focused literature, visual aids and animated films via patient charities like Heart Valve Voice and the British Heart Foundation national PPI group. Dissemination to clinicians and professional stakeholders like commissioners will be through peer reviewed publication and conferences. Any changes to the protocol will be communicated to all relevant parties as per the HREC requirements.

## Discussion

---

Prehabilitation in cardiac surgery has lagged behind that for other specialties, especially cancer surgery, abdominal general surgery and limb reconstruction surgery in the UK(31). This is despite the fact that large numbers of patients undergo cardiac surgery in the UK every year (around 35,000). Moreover, cardiac surgery patients in particular stand to benefit from a prehabilitation interventions because they tend to be older, mean age 67 years and increasing(1) and have a higher co-morbid burden (average Charlson score 2.1 vs 1.7) (GIRFT Programme National Specialty Report). In particular, they suffer from high levels of obesity, diabetes, coexisting lung disease and reduced mobility. The chronic nature of most cardiac conditions prior to reaching the point of surgical intervention and the fact that the cardiac disease process itself usually limits physical activity, means that patients awaiting cardiac surgery usually exhibit a high prevalence of frailty and loss of muscle mass and function, a condition usually referred to as sarcopenia(32-34).

In 2019 our group published a review of 483 publications, of which 10 (including 4 metaanalysis and 6 RCTs) represented the best evidence to answer the clinical question 'does pre-habilitation improve outcomes in cardiac surgical patients?'(35). The RCTs were limited by small sample sizes (the smallest had a sample size of 15) and no trial combined physical activity and IMT (the 2 interventions with the largest evidence base of impact for outcomes) as components in the intervention. A subsequent systematic review which explored associations between objectively measured physical activity during the prehabilitation period and health-related outcomes across surgery types reported significant beneficial associations(36).

The significant benefit of prehabilitation in other therapeutic areas and the scarcity of high quality evidence in cardiac surgery patients identifies an urgent need to provide further data in this area.

## Anticipated Impact

This will be the largest ever RCT investigating the impact of a prehabilitation intervention composed of exercise and IMT in patients with severe cardiac disease awaiting elective cardiac surgery. The findings will establish if such an intervention is feasible and if it is effective in improving overall functional exercise capacity prior to surgery. It will also indicate if there are any impacts on clinical outcome after surgery.

## Trial status

The PrEPS trial opened to recruitment in November 2019, just prior to the start of the global pandemic. The restrictions imposed by the COVID-19 pandemic has had a significant impact on recruitment, elective cardiac surgery and the ability to deliver the prehabilitation intervention. Despite these challenges PrEPS continues to recruit patients and is projected complete follow up data collection by early 2023.

## Acknowledgements

We would like to thank HRUK for their funding and on-going support of the PrEPS trial with an extension to ensure this clinically important trial is seen through to completion.

The successful delivery of PrEPS would not have been possible without the support from the cardiac surgeons at the James Cook University Hospital (*Simon Kendall, Andrew Goodwin, Andrew Owens, Ralph White, Mazzy Kanani and Danai Karamanou*), Newcastle CTU and the cardiac research and rehab delivery teams (*Jon Pritchard, Jess Wigham, Carmen Neave, Karen Ainsworth, Lyn Whitehouse, Louise Sarginson and Fiona Bowe*).

## Author contributions

All authors meet the criteria for authorship stated in the Uniform Requirements for Manuscripts Submitted to Biomedical Journals (ICMJE).

1. Enoch Akowuah - devised the clinical question, applied for funding, Chief investigator with overall responsibility for the trial, reviewed and contributed to all areas of the manuscript
2. Ayesha Mathias - Trial manager with day to day responsibility for delivery of the trial, drafted all areas of the manuscript and contributed to all areas
3. Michelle Bardgett - Senior trial manager, author of the trial protocol, governance oversight, contributed to all areas of manuscript
4. Samantha Harrison - Contributed specifically to the Qualitative Sub-Study and Intervention Design and Delivery sections within the manuscript
5. Adetayo Kasim - General oversight of the Statistical Analysis section of the manuscript and overall review of whole manuscript
6. Kirsti Loughran - Contributed specifically to the Qualitative Sub-Study section within the manuscript



7. Emmanuel Ogundimu - Statistical oversight and contributed specifically to the Statistical Analysis
8. Jason Trevis - Contributed specifically to the Qualitative Sub-Study section within the manuscript
9. Janelle Wagnild - Drafted and contributed specifically to the Statistical Analysis and accelerometer sub-study sections of the manuscript
10. Pasan Witharana - Contributed specifically to the Qualitative Sub-Study section within the manuscript
11. Helen Hancock - Co-Applicant, Protocol Author, general overview and contribution to all areas within manuscript
12. Rebecca Maier - Co-Applicant, Protocol Author, general overview and contribution to all areas within manuscript

Several reviews of the manuscript took place prior to a final draft with all authors reviewing the final draft once complete prior to submission. All authors are informed of any revisions that may need to take place following editorial review and confirm these changes are acceptable prior to re-submission.

## Declaration of Competing Interests

There are no competing interests to declare.

## Funding Statement

The PrEPS trial is funded by Heart Research UK (RG2671/18/20) and Research Capacity Funding from South Tees NFH.

## References:

1. Grant SWaJ, David P. National Cardiac Surgery Activity and Outcomes Report 2002-20162017.
2. Wang W, Bagshaw SM, Norris CM, Zibdawi R, Zibdawi M, MacArthur R, et al. Association between older age and outcome after cardiac surgery: a population-based cohort study. *J Cardiothorac Surg*. 2014;9:177.
3. Wynter-Blyth V, Moorthy K. Prehabilitation: preparing patients for surgery. *BMJ*. 2017;358:j3702.
4. Sui X, Laditka JN, Hardin JW, Blair SN. Estimated functional capacity predicts mortality in older adults. *J Am Geriatr Soc*. 2007;55(12):1940-7.
5. Mandsager K, Harb S, Cremer P, Phelan D, Nissen SE, Jaber W. Association of Cardiorespiratory Fitness With Long-term Mortality Among Adults Undergoing Exercise Treadmill Testing. *JAMA Netw Open*. 2018;1(6):e183605.

- 1 6. Group JJW. Guidelines for rehabilitation in patients with cardiovascular disease (JCS 2012). *Circ J*.  
2 2014;78(8):2022-93.  
3
- 4 7. Tueller C, Kern L, Azzola A, Baty F, Condrau S, Wiegand J, et al. Six-minute walk test enhanced by mobile  
5 telemetric cardiopulmonary monitoring. *Respiration*. 2010;80(5):410-8.  
6  
7
- 8 8. Argunova Y, Belik E, Gruzdeva O, Ivanov S, Pomeskina S, Barbarash O. Effects of Physical Prehabilitation on  
9 the Dynamics of the Markers of Endothelial Function in Patients Undergoing Elective Coronary Bypass Surgery. *J Pers*  
10 *Med*. 2022;12(3).  
11  
12  
13
- 14 9. Boidin M, Gayda M, Henri C, Hayami D, Trachsel LD, Besnier F, et al. Effects of interval training on risk  
15 markers for arrhythmic death: a randomized controlled trial. *Clin Rehabil*. 2019;33(8):1320-30.  
16  
17  
18
- 19 10. McCann M, Stamp N, Ngui A, Litton E. Cardiac Prehabilitation. *J Cardiothorac Vasc Anesth*. 2019;33(8):2255-  
20 65.  
21  
22  
23
- 24 11. Hulzebos EH, Smit Y, Helders PP, van Meeteren NL. Preoperative physical therapy for elective cardiac surgery  
25 patients. *Cochrane Database Syst Rev*. 2012;11:CD010118.  
26  
27
- 28 12. Katsura M, Kuriyama A, Takeshima T, Fukuhara S, Furukawa TA. Preoperative inspiratory muscle training for  
29 postoperative pulmonary complications in adults undergoing cardiac and major abdominal surgery. *Cochrane*  
30 *Database Syst Rev*. 2015(10):CD010356.  
31  
32  
33
- 34 13. Mans CM, Reeve JC, Elkins MR. Postoperative outcomes following preoperative inspiratory muscle training in  
35 patients undergoing cardiothoracic or upper abdominal surgery: a systematic review and meta analysis. *Clin Rehabil*.  
36 2015;29(5):426-38.  
37  
38  
39
- 40 14. Snowdon D, Haines TP, Skinner EH. Preoperative intervention reduces postoperative pulmonary  
41 complications but not length of stay in cardiac surgical patients: a systematic review. *J Physiother*. 2014;60(2):66-77.  
42  
43
- 44 15. Lai FY, Abbasciano RG, Tabberer B, Kumar T, Murphy GJ, Partnership SGotJLAHSPS. Identifying research  
45 priorities in cardiac surgery: a report from the James Lind Alliance Priority Setting Partnership in adult heart surgery.  
46 *BMJ Open*. 2020;10(9):e038001.  
47  
48  
49
- 50 16. Ramos RJ, Ladha KS, Cuthbertson BH, Shulman MA, Myles PS, Wijesundera DN, et al. Association of six-  
51 minute walk test distance with postoperative complications in non-cardiac surgery: a secondary analysis of a  
52 multicentre prospective cohort study. *Can J Anaesth*. 2021;68(4):514-29.  
53  
54  
55
- 56 17. Sumin AN, Oleinik PA, Bezdenezhnykh AV, Bezdenezhnykh NA. Factors Determining the Functional State of  
57 Cardiac Surgery Patients with Complicated Postoperative Period. *Int J Environ Res Public Health*. 2022;19(7).  
58  
59  
60

- 1 18. Chen YC, Chen KC, Lu LH, Wu YL, Lai TJ, Wang CH. Validating the 6-minute walk test as an indicator of  
2 recovery in patients undergoing cardiac surgery: A prospective cohort study. *Medicine (Baltimore)*.  
3 2018;97(42):e12925.  
4
- 5  
6 19. Laboratories ACoPSfCPF. ATS statement: guidelines for the six-minute walk test. *Am J Respir Crit Care Med*.  
7 2002;166(1):111-7.  
8
- 9  
10 20. Society ATSER. ATS/ERS Statement on respiratory muscle testing. *Am J Respir Crit Care Med*.  
11 2002;166(4):518-624.  
12
- 13  
14  
15 21. Brooks R. EuroQol: the current state of play. *Health Policy*. 1996;37(1):53-72.  
16
- 17  
18 22. Zigmond AS, Snaith RP. The hospital anxiety and depression scale. *Acta Psychiatr Scand*. 1983;67(6):361-70.  
19
- 20  
21 23. Migueles J, Rowlands A, Huber F, Sabia S, van hees V. GGIR:  
22  
23 A Research Community–Driven Open Source R Package for Generating Physical  
24  
25 Activity and Sleep Outcomes From Multi-Day Raw Accelerometer Data. *Journal for the Measurement of Physical*  
26  
27 Behaviour. 2019;2(3).  
28
- 29  
30 24. Braun V, Clarke V. Using thematic analysis in psychology. *Qualitative Research in Psychology*. 2006;3(2):77-  
31 101.  
32
- 33  
34 25. May CR, Cummings A, Girling M, Bracher M, Mair FS, May CM, et al. Using Normalization Process Theory in  
35 feasibility studies and process evaluations of complex healthcare interventions: a systematic review. *Implement Sci*.  
36 2018;13(1):80.  
37
- 38  
39  
40 26. Bellg AJ, Borrelli B, Resnick B, Hecht J, Minicucci DS, Ory M, et al. Enhancing treatment fidelity in health  
41 behavior change studies: best practices and recommendations from the NIH Behavior Change Consortium. *Health*  
42  
43 Psychol. 2004;23(5):443-51.  
44
- 45  
46 27. Tavella R, O'Toole K, Tirimacco R, Lloyd A, Pennington K, Drilling S, et al. Cardiac  
47  
48 rehabilitation referral and completion: results from the South Australian  
49  
50 minimum dataset for cardiac rehabilitation programs. . 2015.  
51
- 52  
53 28. Higgins RO, Murphy BM, Goble AJ, Le Grande MR, Elliott PC, Worcester MU. Cardiac rehabilitation program  
54 attendance after coronary artery bypass surgery: overcoming the barriers. *Med J Aust*. 2008;188(12):712-4.  
55
- 56  
57 29. Gallagher R, McKinley S, Dracup K. Predictors of women's attendance at cardiac rehabilitation programs.  
58  
59 *Prog Cardiovasc Nurs*. 2003;18(3):121-6.  
60

- 1 30. Gremeaux V, Troisgros O, Benaïm S, Hannequin A, Laurent Y, Casillas JM, et al. Determining the minimal  
2 clinically important difference for the six-minute walk test and the 200-meter fast-walk test during cardiac  
3 rehabilitation program in coronary artery disease patients after acute coronary syndrome. *Arch Phys Med Rehabil.*  
4 2011;92(4):611-9.  
5  
6
- 7 31. Prehabilitation for people with cancer2020.  
8  
9
- 10 32. Joshi A, Mancini R, Probst S, Abikhzer G, Langlois Y, Morin JF, et al. Sarcopenia in cardiac surgery: Dual X-ray  
11 absorptiometry study from the McGill frailty registry. *Am Heart J.* 2021;239:52-8.  
12  
13
- 14 33. Okamura H, Kimura N, Tanno K, Mieno M, Matsumoto H, Yamaguchi A, et al. How is preoperative sarcopenia  
15 assessed in patients undergoing heart valve surgery? *J Thorac Cardiovasc Surg.* 2019;157(4):e199-e200.  
16  
17
- 18 34. Yuenyongchaiwat K, Kulchanarat C, Satdhabudha O. Sarcopenia in open heart surgery patients: A cohort  
19 study. *Heliyon.* 2020;6(12):e05759.  
20  
21
- 22 35. Sandhu MS, Akowuah EF. Does prehabilitation improve outcomes in cardiac surgical patients? *Interact*  
23 *Cardiovasc Thorac Surg.* 2019;29(4):608-11.  
24  
25
- 26 36. Wagnild JM, Akowuah E, Maier RH, Hancock HC, Kasim A. Impact of prehabilitation on objectively measured  
27 physical activity levels in elective surgery patients: a systematic review. *BMJ Open.* 2021;11(9):e049202.  
28  
29  
30  
31  
32  
33  
34

35 **Figure 1. Consort Diagram to show research activity in the PrEPS trial** – this consort diagram depicts the stages  
36 throughout the trial from screening, randomisation, intervention and through the various follow up stages. A summary of  
37 what assessments are conducted is provided at each stage.  
38  
39  
40  
41  
42  
43  
44  
45  
46  
47  
48  
49  
50  
51  
52  
53  
54  
55  
56  
57  
58  
59  
60

# PREHABILITATION IN ELECTIVE PATIENTS UNDERGOING CARDIAC SURGERY: A RANDOMISED CONTROL TRIAL (THE PrEPS TRIAL)

## Figures

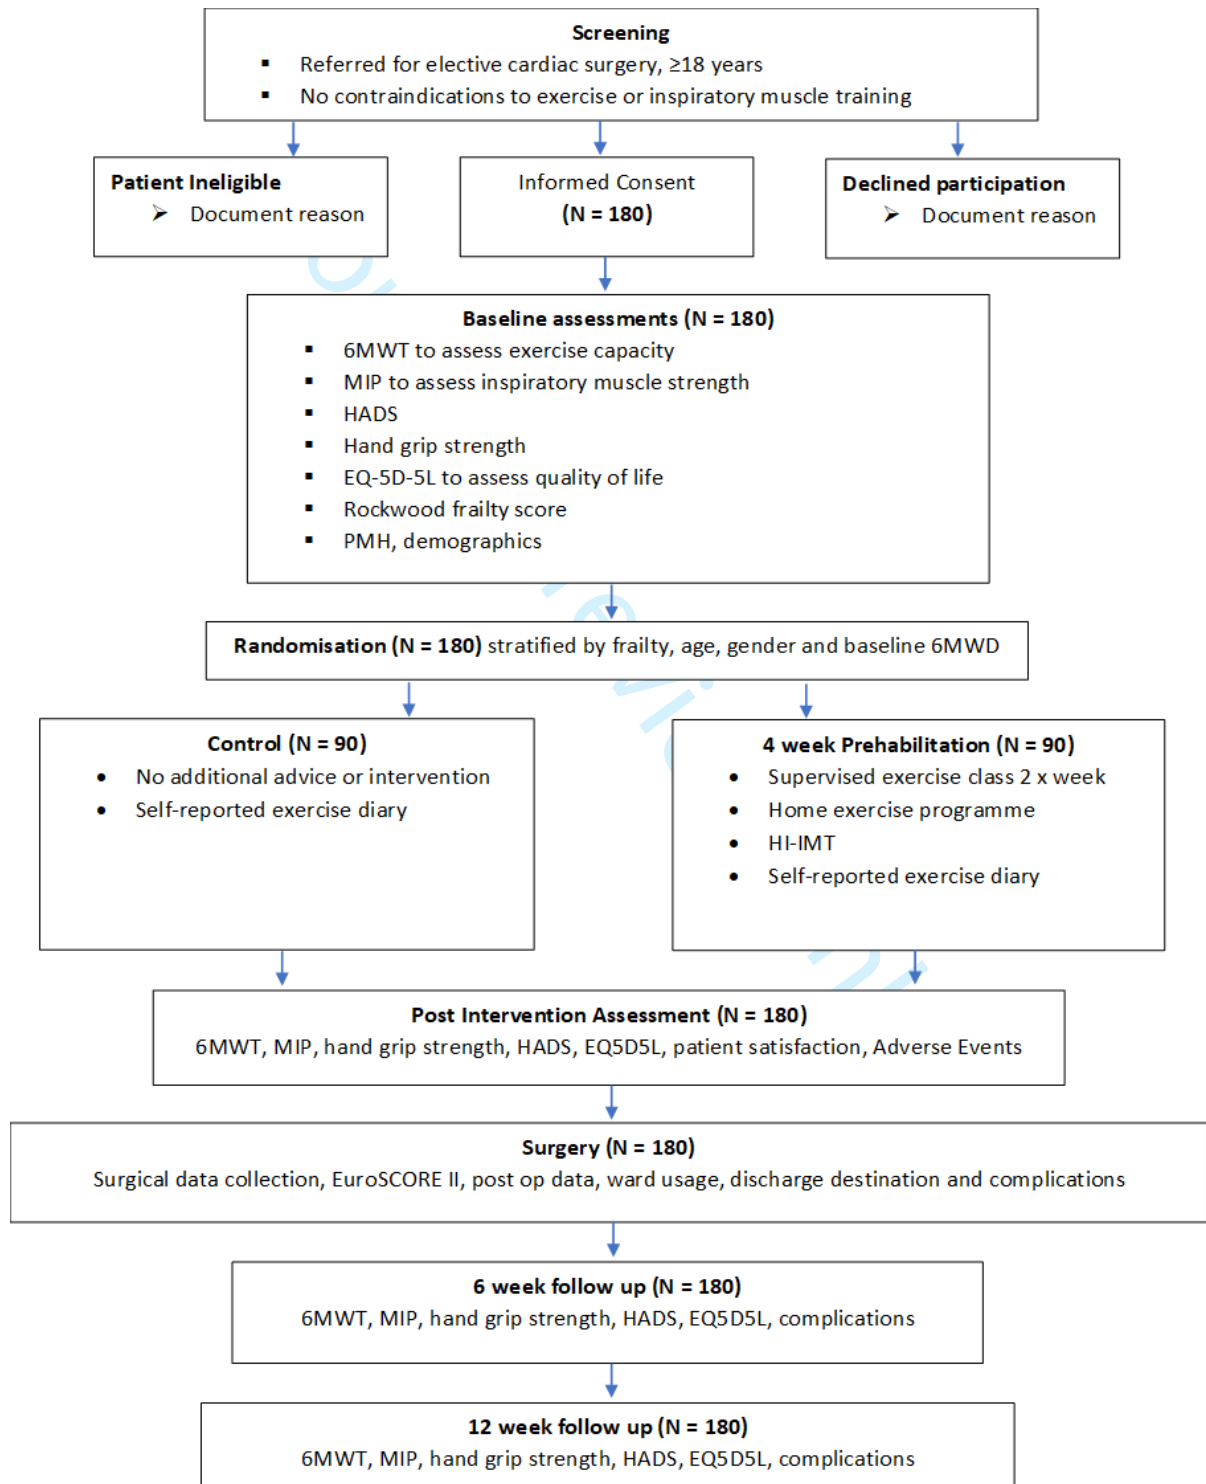

Figure 1. Consort Diagram to show research activity in the PrEPS trial

# Reporting checklist for protocol of a clinical trial.

Based on the SPIRIT guidelines.

## Instructions to authors

Complete this checklist by entering the page numbers from your manuscript where readers will find each of the items listed below.

Your article may not currently address all the items on the checklist. Please modify your text to include the missing information. If you are certain that an item does not apply, please write "n/a" and provide a short explanation.

Upload your completed checklist as an extra file when you submit to a journal.

In your methods section, say that you used the SPIRIT reporting guidelines, and cite them as:

Chan A-W, Tetzlaff JM, Gøtzsche PC, Altman DG, Mann H, Berlin J, Dickersin K, Hróbjartsson A, Schulz KF, Parulekar WR, Krleža-Jerić K, Laupacis A, Moher D. SPIRIT 2013 Explanation and Elaboration: Guidance for protocols of clinical trials. *BMJ*. 2013;346:e7586

|                                   | Reporting Item                                                                                                                  | Page Number |
|-----------------------------------|---------------------------------------------------------------------------------------------------------------------------------|-------------|
| <b>Administrative information</b> |                                                                                                                                 |             |
| Title                             | <a href="#">#1</a> Descriptive title identifying the study design, population, interventions, and, if applicable, trial acronym | Page 1      |

|    |                     |                     |                                                    |                    |
|----|---------------------|---------------------|----------------------------------------------------|--------------------|
| 1  | Trial registration  | <a href="#">#2a</a> | Trial identifier and registry name. If not yet     | Page 2             |
| 2  |                     |                     | registered, name of intended registry              |                    |
| 3  |                     |                     |                                                    |                    |
| 4  |                     |                     |                                                    |                    |
| 5  |                     |                     |                                                    |                    |
| 6  | Trial registration: | <a href="#">#2b</a> | All items from the World Health Organization       | Met across         |
| 7  |                     |                     |                                                    |                    |
| 8  | data set            |                     | Trial Registration Data Set                        | various pages      |
| 9  |                     |                     |                                                    |                    |
| 10 |                     |                     |                                                    |                    |
| 11 |                     |                     |                                                    | within manuscript. |
| 12 |                     |                     |                                                    |                    |
| 13 |                     |                     |                                                    |                    |
| 14 | Protocol version    | <a href="#">#3</a>  | Date and version identifier                        | Page 2             |
| 15 |                     |                     |                                                    |                    |
| 16 |                     |                     |                                                    |                    |
| 17 | Funding             | <a href="#">#4</a>  | Sources and types of financial, material, and      | Page 14            |
| 18 |                     |                     | other support                                      |                    |
| 19 |                     |                     |                                                    |                    |
| 20 |                     |                     |                                                    |                    |
| 21 |                     |                     |                                                    |                    |
| 22 | Roles and           | <a href="#">#5a</a> | Names, affiliations, and roles of protocol         | Page 1             |
| 23 |                     |                     |                                                    |                    |
| 24 | responsibilities:   |                     | contributors                                       |                    |
| 25 |                     |                     |                                                    |                    |
| 26 | contributorship     |                     |                                                    |                    |
| 27 |                     |                     |                                                    |                    |
| 28 |                     |                     |                                                    |                    |
| 29 |                     |                     |                                                    |                    |
| 30 | Roles and           | <a href="#">#5b</a> | Name and contact information for the trial         | Page 1             |
| 31 |                     |                     |                                                    |                    |
| 32 | responsibilities:   |                     | sponsor                                            |                    |
| 33 |                     |                     |                                                    |                    |
| 34 | sponsor contact     |                     |                                                    |                    |
| 35 |                     |                     |                                                    |                    |
| 36 | information         |                     |                                                    |                    |
| 37 |                     |                     |                                                    |                    |
| 38 |                     |                     |                                                    |                    |
| 39 |                     |                     |                                                    |                    |
| 40 | Roles and           | <a href="#">#5c</a> | Role of study sponsor and funders, if any, in      | Not included due   |
| 41 |                     |                     |                                                    |                    |
| 42 | responsibilities:   |                     | study design; collection, management, analysis,    | to word limit –    |
| 43 |                     |                     |                                                    |                    |
| 44 | sponsor and funder  |                     | and interpretation of data; writing of the report; | within protocol    |
| 45 |                     |                     |                                                    |                    |
| 46 |                     |                     |                                                    |                    |
| 47 |                     |                     | and the decision to submit the report for          | itself             |
| 48 |                     |                     |                                                    |                    |
| 49 |                     |                     | publication, including whether they will have      |                    |
| 50 |                     |                     |                                                    |                    |
| 51 |                     |                     | ultimate authority over any of these activities    |                    |
| 52 |                     |                     |                                                    |                    |
| 53 |                     |                     |                                                    |                    |
| 54 |                     |                     |                                                    |                    |
| 55 |                     |                     |                                                    |                    |
| 56 |                     |                     |                                                    |                    |
| 57 |                     |                     |                                                    |                    |
| 58 |                     |                     |                                                    |                    |
| 59 |                     |                     |                                                    |                    |
| 60 |                     |                     |                                                    |                    |

|    |                      |                     |                                                     |          |
|----|----------------------|---------------------|-----------------------------------------------------|----------|
| 1  | Roles and            | <a href="#">#5d</a> | Composition, roles, and responsibilities of the     | Page 10  |
| 2  |                      |                     |                                                     |          |
| 3  | responsibilities:    |                     | coordinating centre, steering committee, endpoint   |          |
| 4  |                      |                     |                                                     |          |
| 5  | committees           |                     | adjudication committee, data management team,       |          |
| 6  |                      |                     |                                                     |          |
| 7  |                      |                     | and other individuals or groups overseeing the      |          |
| 8  |                      |                     |                                                     |          |
| 9  |                      |                     | trial, if applicable (see Item 21a for data         |          |
| 10 |                      |                     |                                                     |          |
| 11 |                      |                     | monitoring committee)                               |          |
| 12 |                      |                     |                                                     |          |
| 13 |                      |                     |                                                     |          |
| 14 |                      |                     |                                                     |          |
| 15 | <b>Introduction</b>  |                     |                                                     |          |
| 16 |                      |                     |                                                     |          |
| 17 |                      |                     |                                                     |          |
| 18 | Background and       | <a href="#">#6a</a> | Description of research question and justification  | Page 3-4 |
| 19 |                      |                     |                                                     |          |
| 20 | rationale            |                     | for undertaking the trial, including summary of     |          |
| 21 |                      |                     |                                                     |          |
| 22 |                      |                     | relevant studies (published and unpublished)        |          |
| 23 |                      |                     |                                                     |          |
| 24 |                      |                     | examining benefits and harms for each               |          |
| 25 |                      |                     |                                                     |          |
| 26 |                      |                     | intervention                                        |          |
| 27 |                      |                     |                                                     |          |
| 28 |                      |                     |                                                     |          |
| 29 |                      |                     |                                                     |          |
| 30 |                      |                     |                                                     |          |
| 31 | Background and       | <a href="#">#6b</a> | Explanation for choice of comparators               | Page 3-4 |
| 32 |                      |                     |                                                     |          |
| 33 | rationale: choice of |                     |                                                     |          |
| 34 |                      |                     |                                                     |          |
| 35 | comparators          |                     |                                                     |          |
| 36 |                      |                     |                                                     |          |
| 37 |                      |                     |                                                     |          |
| 38 | Objectives           | <a href="#">#7</a>  | Specific objectives or hypotheses                   | Page 5   |
| 39 |                      |                     |                                                     |          |
| 40 |                      |                     |                                                     |          |
| 41 | Trial design         | <a href="#">#8</a>  | Description of trial design including type of trial | Page 4-5 |
| 42 |                      |                     |                                                     |          |
| 43 |                      |                     | (eg, parallel group, crossover, factorial, single   |          |
| 44 |                      |                     |                                                     |          |
| 45 |                      |                     | group), allocation ratio, and framework (eg,        |          |
| 46 |                      |                     |                                                     |          |
| 47 |                      |                     | superiority, equivalence, non-inferiority,          |          |
| 48 |                      |                     |                                                     |          |
| 49 |                      |                     | exploratory)                                        |          |
| 50 |                      |                     |                                                     |          |
| 51 |                      |                     |                                                     |          |
| 52 |                      |                     |                                                     |          |
| 53 |                      |                     |                                                     |          |
| 54 | <b>Methods:</b>      |                     |                                                     |          |
| 55 |                      |                     |                                                     |          |
| 56 | <b>Participants,</b> |                     |                                                     |          |
| 57 |                      |                     |                                                     |          |
| 58 |                      |                     |                                                     |          |
| 59 |                      |                     |                                                     |          |
| 60 |                      |                     |                                                     |          |



1 **interventions, and**  
 2  
 3 **outcomes**

|    |                      |                      |                                                        |
|----|----------------------|----------------------|--------------------------------------------------------|
| 4  |                      |                      |                                                        |
| 5  |                      |                      |                                                        |
| 6  | Study setting        | <a href="#">#9</a>   | Description of study settings (eg, community           |
| 7  |                      |                      | clinic, academic hospital) and list of countries       |
| 8  |                      |                      | where data will be collected. Reference to where       |
| 9  |                      |                      | list of study sites can be obtained                    |
| 10 |                      |                      |                                                        |
| 11 |                      |                      |                                                        |
| 12 |                      |                      |                                                        |
| 13 |                      |                      |                                                        |
| 14 |                      |                      |                                                        |
| 15 | Eligibility criteria | <a href="#">#10</a>  | Inclusion and exclusion criteria for participants. If  |
| 16 |                      |                      | applicable, eligibility criteria for study centres and |
| 17 |                      |                      | individuals who will perform the interventions (eg,    |
| 18 |                      |                      | surgeons, psychotherapists)                            |
| 19 |                      |                      |                                                        |
| 20 |                      |                      |                                                        |
| 21 |                      |                      |                                                        |
| 22 |                      |                      |                                                        |
| 23 |                      |                      |                                                        |
| 24 |                      |                      |                                                        |
| 25 | Interventions:       | <a href="#">#11a</a> | Interventions for each group with sufficient detail    |
| 26 |                      |                      | to allow replication, including how and when they      |
| 27 | description          |                      | will be administered                                   |
| 28 |                      |                      |                                                        |
| 29 |                      |                      |                                                        |
| 30 |                      |                      |                                                        |
| 31 |                      |                      |                                                        |
| 32 |                      |                      |                                                        |
| 33 | Interventions:       | <a href="#">#11b</a> | Criteria for discontinuing or modifying allocated      |
| 34 |                      |                      | interventions for a given trial participant (eg, drug  |
| 35 | modifications        |                      | dose change in response to harms, participant          |
| 36 |                      |                      | request, or improving / worsening disease)             |
| 37 |                      |                      |                                                        |
| 38 |                      |                      |                                                        |
| 39 |                      |                      |                                                        |
| 40 |                      |                      |                                                        |
| 41 |                      |                      |                                                        |
| 42 |                      |                      |                                                        |
| 43 | Interventions:       | <a href="#">#11c</a> | Strategies to improve adherence to intervention        |
| 44 |                      |                      | protocols, and any procedures for monitoring           |
| 45 | adherence            |                      | adherence (eg, drug tablet return; laboratory          |
| 46 |                      |                      | tests)                                                 |
| 47 |                      |                      |                                                        |
| 48 |                      |                      |                                                        |
| 49 |                      |                      |                                                        |
| 50 |                      |                      |                                                        |
| 51 |                      |                      |                                                        |
| 52 |                      |                      |                                                        |
| 53 | Interventions:       | <a href="#">#11d</a> | Relevant concomitant care and interventions that       |
| 54 |                      |                      | are permitted or prohibited during the trial           |
| 55 | concomitant care     |                      |                                                        |
| 56 |                      |                      |                                                        |
| 57 |                      |                      |                                                        |
| 58 |                      |                      |                                                        |
| 59 |                      |                      |                                                        |
| 60 |                      |                      |                                                        |

|    |                      |                     |                                                    |         |
|----|----------------------|---------------------|----------------------------------------------------|---------|
| 1  | Outcomes             | <a href="#">#12</a> | Primary, secondary, and other outcomes,            | Page 6  |
| 2  |                      |                     |                                                    |         |
| 3  |                      |                     |                                                    |         |
| 4  |                      |                     | including the specific measurement variable (eg,   |         |
| 5  |                      |                     | systolic blood pressure), analysis metric (eg,     |         |
| 6  |                      |                     | change from baseline, final value, time to event), |         |
| 7  |                      |                     | method of aggregation (eg, median, proportion),    |         |
| 8  |                      |                     | and time point for each outcome. Explanation of    |         |
| 9  |                      |                     | the clinical relevance of chosen efficacy and      |         |
| 10 |                      |                     | harm outcomes is strongly recommended              |         |
| 11 |                      |                     |                                                    |         |
| 12 |                      |                     |                                                    |         |
| 13 |                      |                     |                                                    |         |
| 14 |                      |                     |                                                    |         |
| 15 |                      |                     |                                                    |         |
| 16 |                      |                     |                                                    |         |
| 17 |                      |                     |                                                    |         |
| 18 |                      |                     |                                                    |         |
| 19 |                      |                     |                                                    |         |
| 20 | Participant timeline | <a href="#">#13</a> | Time schedule of enrolment, interventions          | Page 5  |
| 21 |                      |                     | (including any run-ins and washouts),              |         |
| 22 |                      |                     | assessments, and visits for participants. A        |         |
| 23 |                      |                     | schematic diagram is highly recommended (see       |         |
| 24 |                      |                     | Figure)                                            |         |
| 25 |                      |                     |                                                    |         |
| 26 |                      |                     |                                                    |         |
| 27 |                      |                     |                                                    |         |
| 28 |                      |                     |                                                    |         |
| 29 |                      |                     |                                                    |         |
| 30 |                      |                     |                                                    |         |
| 31 |                      |                     |                                                    |         |
| 32 | Sample size          | <a href="#">#14</a> | Estimated number of participants needed to         | Page 12 |
| 33 |                      |                     | achieve study objectives and how it was            |         |
| 34 |                      |                     | determined, including clinical and statistical     |         |
| 35 |                      |                     | assumptions supporting any sample size             |         |
| 36 |                      |                     | calculations                                       |         |
| 37 |                      |                     |                                                    |         |
| 38 |                      |                     |                                                    |         |
| 39 |                      |                     |                                                    |         |
| 40 |                      |                     |                                                    |         |
| 41 |                      |                     |                                                    |         |
| 42 |                      |                     |                                                    |         |
| 43 |                      |                     |                                                    |         |
| 44 | Recruitment          | <a href="#">#15</a> | Strategies for achieving adequate participant      | Page 5  |
| 45 |                      |                     | enrolment to reach target sample size              |         |
| 46 |                      |                     |                                                    |         |
| 47 |                      |                     |                                                    |         |
| 48 |                      |                     |                                                    |         |
| 49 |                      |                     |                                                    |         |

## Methods:

### Assignment of interventions (for controlled trials)

|    |                     |                      |                                                       |            |
|----|---------------------|----------------------|-------------------------------------------------------|------------|
| 1  | Allocation:         | <a href="#">#16a</a> | Method of generating the allocation sequence          | Page 11-12 |
| 2  |                     |                      |                                                       |            |
| 3  | sequence            |                      | (eg, computer-generated random numbers), and          |            |
| 4  |                     |                      |                                                       |            |
| 5  | generation          |                      | list of any factors for stratification. To reduce     |            |
| 6  |                     |                      |                                                       |            |
| 7  |                     |                      |                                                       |            |
| 8  |                     |                      |                                                       |            |
| 9  |                     |                      |                                                       |            |
| 10 |                     |                      |                                                       |            |
| 11 |                     |                      |                                                       |            |
| 12 |                     |                      |                                                       |            |
| 13 |                     |                      |                                                       |            |
| 14 |                     |                      |                                                       |            |
| 15 |                     |                      |                                                       |            |
| 16 |                     |                      |                                                       |            |
| 17 |                     |                      |                                                       |            |
| 18 |                     |                      |                                                       |            |
| 19 |                     |                      |                                                       |            |
| 20 | Allocation          | <a href="#">#16b</a> | Mechanism of implementing the allocation              | Page 11-12 |
| 21 |                     |                      |                                                       |            |
| 22 | concealment         |                      | sequence (eg, central telephone; sequentially         |            |
| 23 |                     |                      |                                                       |            |
| 24 | mechanism           |                      | numbered, opaque, sealed envelopes),                  |            |
| 25 |                     |                      |                                                       |            |
| 26 |                     |                      |                                                       |            |
| 27 |                     |                      |                                                       |            |
| 28 |                     |                      |                                                       |            |
| 29 |                     |                      |                                                       |            |
| 30 |                     |                      |                                                       |            |
| 31 |                     |                      |                                                       |            |
| 32 | Allocation:         | <a href="#">#16c</a> | Who will generate the allocation sequence, who        | Page 11-12 |
| 33 |                     |                      |                                                       |            |
| 34 | implementation      |                      | will enrol participants, and who will assign          |            |
| 35 |                     |                      |                                                       |            |
| 36 |                     |                      |                                                       |            |
| 37 |                     |                      |                                                       |            |
| 38 |                     |                      |                                                       |            |
| 39 |                     |                      |                                                       |            |
| 40 | Blinding (masking)  | <a href="#">#17a</a> | Who will be blinded after assignment to               | N/A        |
| 41 |                     |                      |                                                       |            |
| 42 |                     |                      |                                                       |            |
| 43 |                     |                      |                                                       |            |
| 44 |                     |                      |                                                       |            |
| 45 |                     |                      |                                                       |            |
| 46 |                     |                      |                                                       |            |
| 47 |                     |                      |                                                       |            |
| 48 |                     |                      |                                                       |            |
| 49 |                     |                      |                                                       |            |
| 50 | Blinding (masking): | <a href="#">#17b</a> | If blinded, circumstances under which unblinding      | N/A        |
| 51 |                     |                      |                                                       |            |
| 52 | emergency           |                      | is permissible, and procedure for revealing a         |            |
| 53 |                     |                      |                                                       |            |
| 54 | unblinding          |                      | participant's allocated intervention during the trial |            |
| 55 |                     |                      |                                                       |            |
| 56 |                     |                      |                                                       |            |
| 57 |                     |                      |                                                       |            |
| 58 |                     |                      |                                                       |            |
| 59 |                     |                      |                                                       |            |
| 60 |                     |                      |                                                       |            |

1 **Methods: Data**  
 2  
 3 **collection,**  
 4  
 5 **management, and**  
 6  
 7 **analysis**  
 8  
 9

|    |                      |                      |                                                                     |
|----|----------------------|----------------------|---------------------------------------------------------------------|
| 10 |                      |                      |                                                                     |
| 11 | Data collection plan | <a href="#">#18a</a> | Plans for assessment and collection of outcome, Page 12             |
| 12 |                      |                      |                                                                     |
| 13 |                      |                      | baseline, and other trial data, including any                       |
| 14 |                      |                      |                                                                     |
| 15 |                      |                      | related processes to promote data quality (eg,                      |
| 16 |                      |                      |                                                                     |
| 17 |                      |                      | duplicate measurements, training of assessors)                      |
| 18 |                      |                      |                                                                     |
| 19 |                      |                      | and a description of study instruments (eg,                         |
| 20 |                      |                      |                                                                     |
| 21 |                      |                      | questionnaires, laboratory tests) along with their                  |
| 22 |                      |                      |                                                                     |
| 23 |                      |                      | reliability and validity, if known. Reference to                    |
| 24 |                      |                      |                                                                     |
| 25 |                      |                      | where data collection forms can be found, if not                    |
| 26 |                      |                      |                                                                     |
| 27 |                      |                      | in the protocol                                                     |
| 28 |                      |                      |                                                                     |
| 29 |                      |                      |                                                                     |
| 30 |                      |                      |                                                                     |
| 31 |                      |                      |                                                                     |
| 32 | Data collection      | <a href="#">#18b</a> | Plans to promote participant retention and In protocol – not        |
| 33 |                      |                      |                                                                     |
| 34 | plan: retention      |                      | complete follow-up, including list of any outcome included in paper |
| 35 |                      |                      |                                                                     |
| 36 |                      |                      | data to be collected for participants who due to word limit         |
| 37 |                      |                      |                                                                     |
| 38 |                      |                      | discontinue or deviate from intervention protocols                  |
| 39 |                      |                      |                                                                     |
| 40 |                      |                      |                                                                     |
| 41 |                      |                      |                                                                     |
| 42 | Data management      | <a href="#">#19</a>  | Plans for data entry, coding, security, and Page 12                 |
| 43 |                      |                      |                                                                     |
| 44 |                      |                      | storage, including any related processes to                         |
| 45 |                      |                      |                                                                     |
| 46 |                      |                      | promote data quality (eg, double data entry;                        |
| 47 |                      |                      |                                                                     |
| 48 |                      |                      | range checks for data values). Reference to                         |
| 49 |                      |                      |                                                                     |
| 50 |                      |                      | where details of data management procedures                         |
| 51 |                      |                      |                                                                     |
| 52 |                      |                      | can be found, if not in the protocol                                |
| 53 |                      |                      |                                                                     |
| 54 |                      |                      |                                                                     |
| 55 |                      |                      |                                                                     |
| 56 |                      |                      |                                                                     |
| 57 |                      |                      |                                                                     |
| 58 |                      |                      |                                                                     |
| 59 |                      |                      |                                                                     |
| 60 |                      |                      |                                                                     |

|    |                        |                      |                                                   |                    |
|----|------------------------|----------------------|---------------------------------------------------|--------------------|
| 1  | Statistics: outcomes   | <a href="#">#20a</a> | Statistical methods for analysing primary and     | Page 11            |
| 2  |                        |                      | secondary outcomes. Reference to where other      |                    |
| 3  |                        |                      | details of the statistical analysis plan can be   |                    |
| 4  |                        |                      | found, if not in the protocol                     |                    |
| 5  |                        |                      |                                                   |                    |
| 6  |                        |                      |                                                   |                    |
| 7  |                        |                      |                                                   |                    |
| 8  |                        |                      |                                                   |                    |
| 9  |                        |                      |                                                   |                    |
| 10 |                        |                      |                                                   |                    |
| 11 | Statistics: additional | <a href="#">#20b</a> | Methods for any additional analyses (eg,          | Page 7-8           |
| 12 | analyses               |                      | subgroup and adjusted analyses)                   |                    |
| 13 |                        |                      |                                                   |                    |
| 14 |                        |                      |                                                   |                    |
| 15 |                        |                      |                                                   |                    |
| 16 | Statistics: analysis   | <a href="#">#20c</a> | Definition of analysis population relating to     | Page 11            |
| 17 | population and         |                      | protocol non-adherence (eg, as randomised         |                    |
| 18 | missing data           |                      | analysis), and any statistical methods to handle  |                    |
| 19 |                        |                      | missing data (eg, multiple imputation)            |                    |
| 20 |                        |                      |                                                   |                    |
| 21 |                        |                      |                                                   |                    |
| 22 |                        |                      |                                                   |                    |
| 23 |                        |                      |                                                   |                    |
| 24 |                        |                      |                                                   |                    |
| 25 |                        |                      |                                                   |                    |
| 26 | <b>Methods:</b>        |                      |                                                   |                    |
| 27 |                        |                      |                                                   |                    |
| 28 | <b>Monitoring</b>      |                      |                                                   |                    |
| 29 |                        |                      |                                                   |                    |
| 30 |                        |                      |                                                   |                    |
| 31 |                        |                      |                                                   |                    |
| 32 | Data monitoring:       | <a href="#">#21a</a> | Composition of data monitoring committee          | N/A – Single Trial |
| 33 | formal committee       |                      | (DMC); summary of its role and reporting          | Oversight          |
| 34 |                        |                      | structure; statement of whether it is independent | Committee in       |
| 35 |                        |                      | from the sponsor and competing interests; and     | place –            |
| 36 |                        |                      | reference to where further details about its      | explanation in     |
| 37 |                        |                      | charter can be found, if not in the protocol.     | protocol           |
| 38 |                        |                      | Alternatively, an explanation of why a DMC is not |                    |
| 39 |                        |                      | needed                                            |                    |
| 40 |                        |                      |                                                   |                    |
| 41 |                        |                      |                                                   |                    |
| 42 |                        |                      |                                                   |                    |
| 43 |                        |                      |                                                   |                    |
| 44 |                        |                      |                                                   |                    |
| 45 |                        |                      |                                                   |                    |
| 46 |                        |                      |                                                   |                    |
| 47 |                        |                      |                                                   |                    |
| 48 |                        |                      |                                                   |                    |
| 49 |                        |                      |                                                   |                    |
| 50 |                        |                      |                                                   |                    |
| 51 | Data monitoring:       | <a href="#">#21b</a> | Description of any interim analyses and stopping  | N/A                |
| 52 | interim analysis       |                      | guidelines, including who will have access to     |                    |
| 53 |                        |                      | these interim results and make the final decision |                    |
| 54 |                        |                      | to terminate the trial                            |                    |
| 55 |                        |                      |                                                   |                    |
| 56 |                        |                      |                                                   |                    |
| 57 |                        |                      |                                                   |                    |
| 58 |                        |                      |                                                   |                    |
| 59 |                        |                      |                                                   |                    |
| 60 |                        |                      |                                                   |                    |

|    |                      |                      |                                                      |          |
|----|----------------------|----------------------|------------------------------------------------------|----------|
| 1  | Harms                | <a href="#">#22</a>  | Plans for collecting, assessing, reporting, and      | Page 11  |
| 2  |                      |                      | managing solicited and spontaneously reported        |          |
| 3  |                      |                      | adverse events and other unintended effects of       |          |
| 4  |                      |                      | trial interventions or trial conduct                 |          |
| 5  |                      |                      |                                                      |          |
| 6  |                      |                      |                                                      |          |
| 7  |                      |                      |                                                      |          |
| 8  |                      |                      |                                                      |          |
| 9  |                      |                      |                                                      |          |
| 10 |                      |                      |                                                      |          |
| 11 | Auditing             | <a href="#">#23</a>  | Frequency and procedures for auditing trial          | Page 12  |
| 12 |                      |                      | conduct, if any, and whether the process will be     |          |
| 13 |                      |                      | independent from investigators and the sponsor       |          |
| 14 |                      |                      |                                                      |          |
| 15 |                      |                      |                                                      |          |
| 16 |                      |                      |                                                      |          |
| 17 |                      |                      |                                                      |          |
| 18 |                      |                      |                                                      |          |
| 19 | <b>Ethics and</b>    |                      |                                                      |          |
| 20 |                      |                      |                                                      |          |
| 21 | <b>dissemination</b> |                      |                                                      |          |
| 22 |                      |                      |                                                      |          |
| 23 |                      |                      |                                                      |          |
| 24 | Research ethics      | <a href="#">#24</a>  | Plans for seeking research ethics committee /        | Page 12  |
| 25 |                      |                      | institutional review board (REC / IRB) approval      |          |
| 26 | approval             |                      |                                                      |          |
| 27 |                      |                      |                                                      |          |
| 28 |                      |                      |                                                      |          |
| 29 | Protocol             | <a href="#">#25</a>  | Plans for communicating important protocol           |          |
| 30 |                      |                      | modifications (eg, changes to eligibility criteria,  |          |
| 31 | amendments           |                      | outcomes, analyses) to relevant parties (eg,         |          |
| 32 |                      |                      | investigators, REC / IRBs, trial participants, trial |          |
| 33 |                      |                      | registries, journals, regulators)                    |          |
| 34 |                      |                      |                                                      |          |
| 35 |                      |                      |                                                      |          |
| 36 |                      |                      |                                                      |          |
| 37 |                      |                      |                                                      |          |
| 38 |                      |                      |                                                      |          |
| 39 |                      |                      |                                                      |          |
| 40 |                      |                      |                                                      |          |
| 41 |                      |                      |                                                      |          |
| 42 | Consent or assent    | <a href="#">#26a</a> | Who will obtain informed consent or assent from      | Page 5-6 |
| 43 |                      |                      | potential trial participants or authorised           |          |
| 44 |                      |                      | surrogates, and how (see Item 32)                    |          |
| 45 |                      |                      |                                                      |          |
| 46 |                      |                      |                                                      |          |
| 47 |                      |                      |                                                      |          |
| 48 |                      |                      |                                                      |          |
| 49 | Consent or assent:   | <a href="#">#26b</a> | Additional consent provisions for collection and     | N/A      |
| 50 |                      |                      | use of participant data and biological specimens     |          |
| 51 | ancillary studies    |                      | in ancillary studies, if applicable                  |          |
| 52 |                      |                      |                                                      |          |
| 53 |                      |                      |                                                      |          |
| 54 |                      |                      |                                                      |          |
| 55 |                      |                      |                                                      |          |
| 56 |                      |                      |                                                      |          |
| 57 |                      |                      |                                                      |          |
| 58 |                      |                      |                                                      |          |
| 59 |                      |                      |                                                      |          |
| 60 |                      |                      |                                                      |          |

|    |                       |                      |                                                        |                     |
|----|-----------------------|----------------------|--------------------------------------------------------|---------------------|
| 1  | Confidentiality       | <a href="#">#27</a>  | How personal information about potential and           | Page 12             |
| 2  |                       |                      | enrolled participants will be collected, shared,       |                     |
| 3  |                       |                      | and maintained in order to protect confidentiality     |                     |
| 4  |                       |                      | before, during, and after the trial                    |                     |
| 5  |                       |                      |                                                        |                     |
| 6  |                       |                      |                                                        |                     |
| 7  |                       |                      |                                                        |                     |
| 8  |                       |                      |                                                        |                     |
| 9  |                       |                      |                                                        |                     |
| 10 |                       |                      |                                                        |                     |
| 11 | Declaration of        | <a href="#">#28</a>  | Financial and other competing interests for            | Page 14             |
| 12 | interests             |                      | principal investigators for the overall trial and      |                     |
| 13 |                       |                      | each study site                                        |                     |
| 14 |                       |                      |                                                        |                     |
| 15 |                       |                      |                                                        |                     |
| 16 |                       |                      |                                                        |                     |
| 17 |                       |                      |                                                        |                     |
| 18 |                       |                      |                                                        |                     |
| 19 | Data access           | <a href="#">#29</a>  | Statement of who will have access to the final         | Page 12             |
| 20 |                       |                      | trial dataset, and disclosure of contractual           |                     |
| 21 |                       |                      | agreements that limit such access for                  |                     |
| 22 |                       |                      | investigators                                          |                     |
| 23 |                       |                      |                                                        |                     |
| 24 |                       |                      |                                                        |                     |
| 25 |                       |                      |                                                        |                     |
| 26 |                       |                      |                                                        |                     |
| 27 |                       |                      |                                                        |                     |
| 28 |                       |                      |                                                        |                     |
| 29 | Ancillary and post    | <a href="#">#30</a>  | Provisions, if any, for ancillary and post-trial care, | Details in protocol |
| 30 | trial care            |                      | and for compensation to those who suffer harm          | – not in paper due  |
| 31 |                       |                      | from trial participation                               | to word count       |
| 32 |                       |                      |                                                        |                     |
| 33 |                       |                      |                                                        |                     |
| 34 |                       |                      |                                                        |                     |
| 35 |                       |                      |                                                        |                     |
| 36 | Dissemination         | <a href="#">#31a</a> | Plans for investigators and sponsor to                 | Page 10 and 12      |
| 37 | policy: trial results |                      | communicate trial results to participants,             |                     |
| 38 |                       |                      | healthcare professionals, the public, and other        |                     |
| 39 |                       |                      | relevant groups (eg, via publication, reporting in     |                     |
| 40 |                       |                      | results databases, or other data sharing               |                     |
| 41 |                       |                      | arrangements), including any publication               |                     |
| 42 |                       |                      | restrictions                                           |                     |
| 43 |                       |                      |                                                        |                     |
| 44 |                       |                      |                                                        |                     |
| 45 |                       |                      |                                                        |                     |
| 46 |                       |                      |                                                        |                     |
| 47 |                       |                      |                                                        |                     |
| 48 |                       |                      |                                                        |                     |
| 49 |                       |                      |                                                        |                     |
| 50 |                       |                      |                                                        |                     |
| 51 |                       |                      |                                                        |                     |
| 52 |                       |                      |                                                        |                     |
| 53 | Dissemination         | <a href="#">#31b</a> | Authorship eligibility guidelines and any intended     | Page 13             |
| 54 | policy: authorship    |                      | use of professional writers                            |                     |
| 55 |                       |                      |                                                        |                     |
| 56 |                       |                      |                                                        |                     |
| 57 |                       |                      |                                                        |                     |
| 58 |                       |                      |                                                        |                     |
| 59 |                       |                      |                                                        |                     |
| 60 |                       |                      |                                                        |                     |

1 Dissemination [#31c](#) Plans, if any, for granting public access to the full Page 13  
 2  
 3 policy: reproducible protocol, participant-level dataset, and statistical  
 4  
 5 research code  
 6  
 7

## 8 Appendices

9  
 10  
 11  
 12 Informed consent [#32](#) Model consent form and other related Not included  
 13  
 14 materials documentation given to participants and  
 15  
 16 authorised surrogates  
 17  
 18

19  
 20 Biological [#33](#) Plans for collection, laboratory evaluation, and N/A  
 21  
 22 specimens storage of biological specimens for genetic or  
 23  
 24 molecular analysis in the current trial and for  
 25  
 26 future use in ancillary studies, if applicable  
 27  
 28

29  
 30 None The SPIRIT Explanation and Elaboration paper is distributed under the terms of the Creative  
 31  
 32 Commons Attribution License CC-BY-NC. This checklist can be completed online using  
 33  
 34 <https://www.goodreports.org/>, a tool made by the [EQUATOR Network](#) in collaboration with  
 35  
 36 [Penelope.ai](#)  
 37  
 38  
 39  
 40  
 41  
 42  
 43  
 44  
 45  
 46  
 47  
 48  
 49  
 50  
 51  
 52  
 53  
 54  
 55  
 56  
 57  
 58  
 59  
 60



# BMJ Open

## PREHABILITATION IN ELECTIVE PATIENTS UNDERGOING CARDIAC SURGERY: A RANDOMISED CONTROL TRIAL (THE PrEPS TRIAL) – A Study Protocol

|                                 |                                                                                                                                                                                                                                                                                                                                                                                                                                                                                                                                                                                                                                                                                                                                                                                 |
|---------------------------------|---------------------------------------------------------------------------------------------------------------------------------------------------------------------------------------------------------------------------------------------------------------------------------------------------------------------------------------------------------------------------------------------------------------------------------------------------------------------------------------------------------------------------------------------------------------------------------------------------------------------------------------------------------------------------------------------------------------------------------------------------------------------------------|
| Journal:                        | <i>BMJ Open</i>                                                                                                                                                                                                                                                                                                                                                                                                                                                                                                                                                                                                                                                                                                                                                                 |
| Manuscript ID                   | bmjopen-2022-065992.R2                                                                                                                                                                                                                                                                                                                                                                                                                                                                                                                                                                                                                                                                                                                                                          |
| Article Type:                   | Protocol                                                                                                                                                                                                                                                                                                                                                                                                                                                                                                                                                                                                                                                                                                                                                                        |
| Date Submitted by the Author:   | 02-Dec-2022                                                                                                                                                                                                                                                                                                                                                                                                                                                                                                                                                                                                                                                                                                                                                                     |
| Complete List of Authors:       | Akowuah, Enoch; South Tees Hospitals NHS Foundation Trust, James Cook Hospital<br>Mathias, Ayesha; Newcastle University,<br>Bardgett, Michelle; Newcastle University<br>Harrison, Samantha; Teesside University, Health & Social Care<br>Kasim, Adetayo; Durham University, Department of Anthropology<br>Loughran, Kirsti; Teesside University<br>Ogundimu, Emmanuel; University of Durham, Mathematical Sciences<br>Trevis, Jason; James Cook University Hospital, Cardiothoracic Surgery<br>Wagnild, Janelle; Durham University, Departmental of Anthropology<br>Witharana, Pasan; South Tees Hospitals NHS Foundation Trust<br>Hancock, Helen; Newcastle University, Newcastle Clinical Trials Unit<br>Maier, Rebecca; Newcastle University, Newcastle Clinical Trials Unit |
| <b>Primary Subject Heading</b>: | Cardiovascular medicine                                                                                                                                                                                                                                                                                                                                                                                                                                                                                                                                                                                                                                                                                                                                                         |
| Secondary Subject Heading:      | Surgery                                                                                                                                                                                                                                                                                                                                                                                                                                                                                                                                                                                                                                                                                                                                                                         |
| Keywords:                       | Cardiac surgery < SURGERY, Adult cardiology < CARDIOLOGY, Cardiology < INTERNAL MEDICINE                                                                                                                                                                                                                                                                                                                                                                                                                                                                                                                                                                                                                                                                                        |
|                                 |                                                                                                                                                                                                                                                                                                                                                                                                                                                                                                                                                                                                                                                                                                                                                                                 |

SCHOLARONE™  
Manuscripts

# PREHABILITATION IN ELECTIVE PATIENTS UNDERGOING CARDIAC SURGERY: A RANDOMISED CONTROL TRIAL (THE PrEPS TRIAL) – A Study Protocol

## Designated Author/First Author for Correspondence:

Professor Enoch Akowuah

[enoch.akowuah@nhs.net](mailto:enoch.akowuah@nhs.net)

Dept of Cardiac Surgery

South Tees Hospitals NHS Foundation Trust

Marton Road

Middlesbrough

UK

TS4 3BS

## Co-Authors

1. Ayesha Mathias, Newcastle Clinical Trials Unit, Newcastle University, Newcastle Upon Tyne United Kingdom
2. Michelle Bardgett, Newcastle Clinical Trials Unit, Newcastle University, Newcastle Upon Tyne, United Kingdom
3. Samantha Harrison, Centre for Rehabilitation, School of Health and Life Sciences Teeside University, Middlesborough, United Kingdom
4. Adetayo Kasim, Department of Anthropology, Durham University, Durham, United Kingdom
5. Kirsti Loughran, Centre for Rehabilitation, School of Health and Life Sciences, Teeside University, Middlesborough, United Kingdom
6. Emmanuel Ogundimu, Department of Mathematical Sciences, Durham University, Durham, United Kingdom
7. Jason Trevis, Academic Cardiovascular Unit, South Tees NHS Foundation Trust, Middlesborough, United Kingdom
8. Janelle Wagnild, Departmental of Anthropology, Durham University, Durham, United Kingdom
9. Pasan Witharana, Academic Cardiovascular Unit, South Tees NHS Foundation Trust, Middlesborough, United Kingdom
10. Helen Hancock, Newcastle Clinical Trials Unit, Newcastle University, Newcastle Upon Tyne, United Kingdom
11. Rebecca Maier, Newcastle Clinical Trials Unit, Newcastle University, Newcastle Upon Tyne, United Kingdom

## Sponsor Contact

Joe Millar - [stees.dtvra@nhs.net](mailto:stees.dtvra@nhs.net)

James Cook University Hospital, South Tees NHS Foundation Trust, Middlesbrough, United Kingdom

Word Count – 4597

## Abstract

---

### Introduction

Prehabilitation prior to surgery has been shown to reduce postoperative complications, reduce length of hospital stay, and improve quality of life after cancer and limb reconstruction surgery. However, there is minimal data on the impact of prehabilitation in patients undergoing cardiac surgery, despite the fact these patients are generally older and have more comorbidities and frailty. This trial will assess the feasibility and impact of a prehabilitation intervention consisting of exercise and inspiratory muscle training on pre-operative functional exercise capacity in adult patients awaiting elective cardiac surgery, and determine any impact on clinical outcomes after surgery.

### Methods and Analysis

PrEPS is a randomised controlled single-centre trial recruiting 180 participants undergoing elective cardiac surgery. Participants will be randomised in a 1:1 ratio to standard pre-surgical care or standard care plus a prehabilitation intervention. The primary outcome will be change in functional exercise capacity measured as change in the 6 minute walk test distance from baseline. Secondary outcomes will evaluate the impact of prehabilitation on pre-operative and post-operative outcomes including; respiratory function, health related quality of life, anxiety and depression, frailty, and post-operative complications and resource use. This trial will evaluate if a prehabilitation intervention can improve pre-operative physical function, inspiratory muscle function, frailty, and quality of life prior to surgery in elective patients awaiting cardiac surgery, and impact post-operative outcomes.

### Ethics and Dissemination

A favourable opinion was given by the Sheffield Research Ethics Committee in 2019. Trial findings will be disseminated to patients, clinicians, commissioning groups and through peer reviewed publication.

### Trial registration

International Standard Randomised Controlled Trial Number 13860094. Registered on 24 October 2019

PROTOCOL V7.0 20 June 2022

## Article Summary

---

### Strengths and Limitations of this study

1. Largest pragmatic trial combining exercise and IMT for the first time in this population
2. Will establish if a prehab intervention is feasible and if it is effective in improving overall functional exercise capacity prior to surgery
3. Robust assessment of fidelity of the intervention and compliance
4. Important accelerometer sub study to explore change in activity levels and qualitative sub study to explore views and experiences of patients and staff
5. Limited to single centre but will provide critical safety data essential for wider implementation

### Keywords

---

Cardiac Surgery, Prehabilitation, Exercise, High-intensity Inspiratory Muscle Training (IMT)

### Introduction

---

Over 35,000 patients undergo cardiac surgery every year in the UK alone(1). Over the last decade the average age of these patients has increased worldwide, as has the prevalence of patients with multiple comorbidities having cardiac surgery(2). This has the potential to increase mortality, morbidity and resource use resulting from increasing rates of post-operative complications and associated prolonged use of hospital resources.

Prehabilitation programmes are fast becoming a method of being pro-active prior to surgery with the aim of reducing post-operative complications and mortality, giving patients themselves a method of managing their fitness pre-surgery; ultimately with the aim of speeding up recovery and return to normal function after surgery. A BMJ editorial in September 2017(3) highlighted the urgent need to recognise that the drive to improve outcomes after surgery must include optimising patients' health prior to surgery with evidence based prehabilitation programmes. It recognised that programs would have to be tailored for patients and specific interventions.

In cardiac surgery however, there have been few trials investigating the impact of prehabilitation. Primarily, concerns around safety due to delaying intervention to allow prehabilitation to occur and the impact of exercise as part of the intervention has contributed to a lack of trial data. This is despite evidence that exercise interventions can improve

1 cardiovascular function and fitness; an important predictor of mortality in older patients(4). Poor cardiovascular fitness  
2 is known to be associated with higher all-cause mortality(5).  
3

4 In patients awaiting cardiac surgery, the concern has been that severe coronary and valvular lesions e.g. severe aortic  
5 stenosis, cause symptoms with exercise and may precipitate complications. Furthermore patients are frequently told  
6 by their clinicians not to exercise whilst they wait for surgery. Moreover, severe aortic stenosis, left main stem stenosis,  
7 unstable angina, aortic aneurysms, and other cardiac condition are all contraindicated in most exercise and  
8 rehabilitation protocols currently used in the UK(6).  
9  
10

11 There is emerging evidence that patients with severe cardiac conditions can undergo exercise safely. The 6MWT was  
12 shown to be safe in a feasibility study of 244 patients with chronic lung or heart disease with no instances of adverse  
13 events(7). A trial in which low risk patients awaiting electives coronary artery bypass surgery underwent high-intensity  
14 treadmill training reported no significant adverse effects(8). However, neither of these trials included patients with  
15 severe cardiac conditions awaiting surgical intervention. A recent trial in patients with large abdominal aortic  
16 aneurysms awaiting repair has showed that even High Intensity Interval Training (HIIT) appeared to be safe and  
17 beneficial(9). These data have suggested that exercising patients awaiting cardiac surgery may be safe, therefore  
18 stimulating further interest in the role of exercise based prehabilitation prior to cardiac surgery.  
19  
20  
21  
22  
23  
24  
25  
26

27 Inspiratory muscle training (IMT) has the most evidence for improving outcomes after thoracic and cardiac surgery.  
28 This is most commonly achieved using inspiratory threshold-loading devices (threshold-IMT) which increase  
29 respiratory muscle strength and endurance, in turn improving respiratory volume and sputum clearance(10), thereby  
30 reducing postoperative pulmonary complications (PPCs). In cardiac surgery, preoperative IMT has been shown to  
31 reduce PPCs and have a modest effect on postoperative length of stay in high risk patients with pre-existing COPD  
32 after surgery(11). This finding has been confirmed in a number of systematic reviews and meta-analyses(12-14). A  
33 large multicentre trial funded by the NIHR (The INSPIRE Trial) to provide definitive evidence of benefit of IMT is  
34 currently ongoing.  
35  
36  
37  
38  
39  
40

41 To date no RCT has combined IMT with exercise in a prehabilitation intervention to determine the impact in patients  
42 undergoing cardiac surgery.  
43  
44

45 A trial is urgently needed to determine if patients with severe cardiac conditions can undergo prehabilitation safely  
46 prior to cardiac surgery. This was corroborated by a priority setting exercise conducted by The James Lind Alliance in  
47 the UK in 2019, to identify the top 10 research priorities for adult cardiac surgery research. In this Delphi style  
48 consensus exercise involving nearly 1000 patients and stakeholders, research to determine if prehabilitation benefited  
49 patients prior to cardiac surgery was the 4<sup>th</sup> most important of the ten priority research areas(15).  
50  
51  
52  
53

54 The PREPs trial will evaluate if a prehabilitation intervention consisting of exercise and inspiratory muscle training in  
55 patients awaiting elective cardiac surgery can improve pre-operative physical function, inspiratory muscle function,  
56 frailty, and quality of life prior to surgery. Other assessments include the impact of the intervention on post-operative  
57 clinical outcomes, speed of return to normal activity, patients' recovery from surgery and quality of life after surgery.  
58  
59  
60

## Methods/Analysis

### Trial design

A single centre prospective, parallel group randomised controlled trial will be conducted to compare the effect of a prehabilitation intervention on functional, physical and clinical outcomes compared to standard care. Participants will be randomly allocated 1:1 to either standard care or the intervention. Participants allocated to standard care will receive routine pre-operative advice only. Participants allocated to the intervention will receive routine pre-operative advice and a prehabilitation intervention consisting of supervised cardiac exercise sessions, high intensity inspiratory muscle training and a home exercise programme.

Participants will be followed up at routine clinical appointments prior to surgery, during surgical admission, and at 6 and 12 weeks following index surgery (figure 1). After the intervention period all participants will continue with the site's standard pre- and post-operative care.

### Objectives

The Primary objective is to assess the impact of a pre-operative rehabilitation intervention (prehabilitation) on pre-operative functional exercise capacity (measured by change in the 6-minute walk test (6MWT)) from baseline in patients awaiting cardiac surgery.

The secondary objectives are to evaluate the impact of prehabilitation on outcomes including; respiratory function (measured by maximal inspiratory pressure (MIP)), health related quality of life (measured by the EQ-5D-5L), anxiety and depression (measured by the Hospital Anxiety and Depression Scale (HADS) and frailty (measured by grip strength) after the prehabilitation intervention.

The tertiary objectives are to evaluate the impact of prehabilitation on post-operative complication rates, including length of hospital stay, PPCs, and health related quality of life up to 12 weeks after surgery.

Two sub studies will also explore: the use of activity monitors to measure change in objectively measured physical activity from baseline to post-intervention, and the experiences of prehabilitation prior to elective cardiac surgery through the opinions of trial participants and the healthcare professionals responsible for prehabilitation delivery.

### Eligibility

Patients aged 18 and over listed for elective cardiac surgery under the care of the participating surgeons will be screened for eligibility.

Table 1 describes the exclusion criteria in detail specific to the trial.

| Exclusion Criteria                            |
|-----------------------------------------------|
| Unstable angina/indication for urgent surgery |

|    |                                                                                                                                                                                                                                                                                                                                                                                                                                                                                                                                                   |
|----|---------------------------------------------------------------------------------------------------------------------------------------------------------------------------------------------------------------------------------------------------------------------------------------------------------------------------------------------------------------------------------------------------------------------------------------------------------------------------------------------------------------------------------------------------|
| 1  | Malignant Arrhythmias                                                                                                                                                                                                                                                                                                                                                                                                                                                                                                                             |
| 2  | Currently Participating in another interventional clinical trial                                                                                                                                                                                                                                                                                                                                                                                                                                                                                  |
| 3  | Known Pregnancy                                                                                                                                                                                                                                                                                                                                                                                                                                                                                                                                   |
| 4  | Contraindications to known cardiac rehabilitations:                                                                                                                                                                                                                                                                                                                                                                                                                                                                                               |
| 5  | <ul style="list-style-type: none"> <li>6 ○ Acute systemic illness or fever</li> <li>7 ○ Uncontrolled atrial or ventricular arrhythmias</li> <li>8 ○ Uncontrolled sinus tachycardia (HR&gt;120 bpm)</li> <li>9 ○ Aortic stenosis with pre-syncope/syncope</li> <li>10 ○ Acute pericarditis or myocarditis</li> <li>11 ○ Uncompensated HF</li> <li>12 ○ Third degree (complete) atrioventricular (AV) block without pacemaker</li> <li>13 ○ Recent embolism</li> <li>14 ○ Severe Musculoskeletal conditions that would prohibit exercise</li> </ul> |
| 15 | Contraindications to inspiratory muscle training:                                                                                                                                                                                                                                                                                                                                                                                                                                                                                                 |
| 16 | <ul style="list-style-type: none"> <li>17 ○ History of spontaneous pneumothorax/ incomplete recovery following traumatic pneumothorax</li> <li>18 ○ Asthma patients who suffer from frequent, severe exacerbations</li> <li>19 ○ Recently perforated ear drum (within last 3 months)</li> <li>20 ○ Large Bullae</li> </ul>                                                                                                                                                                                                                        |

Table 1 Exclusion Criteria

## Recruitment

Adults listed for elective cardiac surgery will be screened by the clinical team and given a patient information sheet (PIS) and letter of invitation prior to their routine clinic appointment. Eligibility will be confirmed by a clinician at the time of listing for surgery. Written informed consent (see supplementary material consent form v4.0) will be obtained before any trial procedures are performed.

## Baseline Data Collection

Baseline assessments will be performed after consent and prior to randomisation. Women of childbearing potential will perform a pregnancy test to confirm pregnancy status before undertaking any further research activity. The baseline assessments will consist of the 6MWT, MIP, EQ5D5L questionnaire, activity monitoring (optional), HADS, Rockwood frailty score (9 point Clinical Frailty Scale (CFS)) and hand grip strength. Participants' medical notes will be used to collect a full medical history, gender, height and weight, and date of birth/age. Participants consenting to take part in the 7 day activity monitoring sub study will be provided with an accelerometer, instructions on its use, and options for returning the accelerometer.

## Randomisation

Participants will be randomised in a 1:1 ratio to either the control arm (standard care only), or the intervention arm (standard care plus the prehabilitation intervention) using a 24-hour, central, secure, web-based system (SealedEnvelope™). Randomisation will be performed using a minimisation scheme that takes into account Rockwood frailty score, 6MWD, age and gender to balance baseline physical fitness between the arms. It will not be possible to conceal the allocation of treatment from the participant, or the team delivering the intervention and measuring the primary outcome. The surgeons performing the participants' cardiac surgery will not be informed of the allocation, however they will not be officially blinded.

## Outcome Measures

The primary outcome will be change in exercise capacity measured by the 6-minute walk test from baseline to pre-surgical assessment. This is a self-paced 6-minute walk recording the distance walked in metres around a 25 meter standardised track.

This outcome was chosen because preoperative 6MWT distance is associated with moderate or severe complications after both non-cardiac surgery(16) and cardiac surgery(17). It has also been validated as an indicator of recovery in patients undergoing cardiac surgery(18).

All participants will receive standardised instruction and support(19). A pulse oximeter will be attached to the participant during the walk for continuous monitoring of oxygen saturations and heart rate. The test will be performed twice at baseline to account for a learning effect; the distance achieved on the two walks will be recorded and the highest value used for baseline measurement. The 6MWT will be repeated once at 6 and 12 weeks following index surgery to assess the post-operative impact of prehabilitation.

The secondary outcome measures in Table 2. will be collected at baseline, pre-surgical assessment, 6 and 12 weeks following index surgery.

| Secondary Outcomes                    | Measurement                                  |
|---------------------------------------|----------------------------------------------|
| Change in Inspiratory muscle strength | Maximal inspiratory pressure (MIP)           |
| Frailty                               | Hand Grip strength                           |
| Quality of life                       | EQ-5D-5L                                     |
| Anxiety and Depression                | Hospital Anxiety and Depression Scale (HADS) |

Table 2. Secondary outcome measures



Maximal inspiratory pressure (MIP) is used to measure inspiratory muscle strength and will be measured using a hand-held electronic transducer (POWERbreath KH2 (HaB Ltd UK), according to guidelines set out in the ATS/ERS statement of 2002(20).

Hand grip strength will be used as an objective measurement of frailty. Participants will be asked to grip a dynamometer (Jamar hydraulic hand dynamometer) as hard as they can using their dominant hand whilst being seated. The highest grip strength of 3 attempts will be recorded.

Two patient reported questionnaires will be collected; the EQ-5D-5L general health questionnaire(21) consists of five domains (mobility, self-care, usual activities, pain/discomfort, and anxiety/depression) and a standard vertical 20cm visual analogue scale (EQ-5D VAS) on a scale of 0 to 100 measuring current health-related quality of life. The health state of each participant, will be measured before and after the intervention period and post-surgery to determine any change in their health (gain or loss). The HADS self-reported questionnaire consists of 14 questions (7 for anxiety and 7 for depression) rated on a Likert-type scale from 0 to 3(22) and will be used to evaluate participants' mood.

In addition, surgical and post-operative data will be collected from participants' medical notes including: duration of operation, cardiopulmonary bypass times, time on ICU, and discharge information. Pulmonary and cardiac complications will be documented as outlined in Table 3.

| <b>Post-operative cardiac surgery complications</b>                                                                                                                                                                                                                              |                                                                                                                                                                                                                                                                                                                                                                                                                                                                                                             |
|----------------------------------------------------------------------------------------------------------------------------------------------------------------------------------------------------------------------------------------------------------------------------------|-------------------------------------------------------------------------------------------------------------------------------------------------------------------------------------------------------------------------------------------------------------------------------------------------------------------------------------------------------------------------------------------------------------------------------------------------------------------------------------------------------------|
| Renal failure/acute kidney injury, tracheostomy, delirium, TIA, stroke, new atrial fibrillation, RBC transfusion, blood product transfusion, cardiac arrest, myocardial infarction, all-cause mortality, infection (in-hospital only), or sepsis (6- and 12-week follow-up only) |                                                                                                                                                                                                                                                                                                                                                                                                                                                                                                             |
| <b>Pulmonary Complications</b>                                                                                                                                                                                                                                                   |                                                                                                                                                                                                                                                                                                                                                                                                                                                                                                             |
| Grade 1                                                                                                                                                                                                                                                                          | <ul style="list-style-type: none"> <li>• New onset purulent sputum or change in character of chronic sputum</li> <li>• Fever with no focus outside of the lungs</li> <li>• New rise in c-reactive protein or white blood cell count, positive blood culture</li> <li>• Atelectasis radiological finding or abnormal lung findings requiring non-invasive intervention</li> <li>• Hypoxaemia</li> <li>• Administration of additional post-operative antibiotics</li> <li>• Transtracheal aspirate</li> </ul> |
| Grade 2                                                                                                                                                                                                                                                                          | <ul style="list-style-type: none"> <li>• Pleural effusion needing drainage</li> <li>• Lung infection</li> <li>• Pneumothorax</li> <li>• Post-operative reintubation</li> <li>• Clinically significant atelectasis requiring tracheobronchial suction</li> </ul>                                                                                                                                                                                                                                             |
| Grade 3                                                                                                                                                                                                                                                                          | <ul style="list-style-type: none"> <li>• Ventilatory failure with postoperative ventilator dependence &gt;8h</li> <li>• Reintubation with a subsequent period of ventilation &gt;48h</li> </ul>                                                                                                                                                                                                                                                                                                             |

Table 3. Pulmonary Cardiac Complications

## Sub-studies

### *Accelerometer Sub-study*

Participants in both trial arms will be invited to take part in an accelerometer sub-study. We anticipate that 50-60% of the trial cohort will take part in the sub-study however this trial is ongoing and therefore this data is not yet available.

Participants will wear an activity monitor on their non-dominant wrist for a continuous period of 7 days at baseline and after the intervention period. Data collected will be processed using the GGIR package in R(23) to explore change in activity levels (including time spent in MVPA, light physical activity and sedentary behaviour), change in moderate-to-vigorous physical activity and between the control and intervention group. The correlation between 7 day activity monitor data and patient reported activity diaries pre and post intervention will also be explored.

### *Qualitative Sub-study*

Participants in both arms will be offered the opportunity to take part in a focus group exploring their experiences of the taking part in the PrEPS trial. Written informed consent (see supplementary material qualitative consent v2.0) will be obtained for each participant. Participants within the intervention and control arms of the trial will attend separate focus groups which will take place after the 12-week post-operative assessment to avoid interference with 12-week patient reported outcomes.

Focus groups will also take place with HCPs involved in the delivery of prehabilitation to explore their experiences of delivering the intervention as part of the PrEPS trial.

Focus group recordings will be transcribed verbatim and analysed using a deductive thematic analysis(24). Themes will be mapped against theoretical constructs of Normalisation Process Theory to highlight relationships and overlap between themes(25).

### **Standard care**

Participants randomised to the standard care group will continue with routine pre-operative care, consisting of specialist nurse review, meeting the surgeon and anaesthetist, and receiving information regarding preparation for surgery. Participants will be provided with a patient diary and asked to document any form of exercise that they carry out independently as well as healthcare visit details to aid collection of adverse events.

### **Prehabilitation intervention**

Participants randomised to the intervention group will receive standard care and a hospital based prehabilitation intervention consisting of an initial fitness assessment, a supervised exercise programme twice a week for 4 weeks, an unsupervised home exercise programme consisting of up to 45 mins of prescribed daily exercise and High Intensity-Inspiratory muscle training (HI-IMT) involving twice daily training for a duration of 4 weeks.

### *Initial Assessment*

At the first cardiac prehabilitation visit, participants will be assessed by a cardiac rehab specialist physiotherapist and nurse to gauge their physical fitness. This involves a subjective and objective assessment; table 4 details these assessments.

|                              |
|------------------------------|
| <b>Subjective Assessment</b> |
|------------------------------|

|                             |                                                                                  |
|-----------------------------|----------------------------------------------------------------------------------|
| 1                           | General wellbeing                                                                |
| 2                           | Recent health issues and medical history                                         |
| 3                           | Fitness and activity levels                                                      |
| 4                           | Anxiety levels                                                                   |
| 5                           | Social circumstances and support                                                 |
| <b>Objective Assessment</b> |                                                                                  |
| 1                           | HR and BP measurements                                                           |
| 2                           | ECG if indicated                                                                 |
| 3                           | Respiratory function (rate, breathing pattern and auscultation with stethoscope) |
| 4                           | Musculoskeletal system (joint range and muscle strength)                         |
| 5                           | Other physical problems                                                          |

Table 4. Participant initial assessments to gauge physical fitness

Participants will also be seen by a respiratory physiotherapist and instructed on how to carry out High Intensity-Inspiratory Muscle Training (HI-IMT). Participants will be given their own device (a POWERbreathe medic plus (HaB Ltd UK)) and an instruction leaflet/diary to use at home.

### *Supervised exercise programme*

The maximum HR and target HR will be calculated for each participant. Exercise intensity will be individually prescribed using the combined results of the initial fitness assessment and the baseline 6MWT. The physiotherapist will discuss the principles of the prescribed exercise with the participant and any precautions they should take to mitigate injury and illness. Participants will be encouraged to achieve a predicted target heart rate of 60 – 75% max and a moderate BORG score (12 or 13) during their cardiovascular exercise with actual figure achieved being recorded.

The cardiac prehabilitation exercise sessions will consist of 3 stages listed in table 5.

|         |                                                                                                                                                               |
|---------|---------------------------------------------------------------------------------------------------------------------------------------------------------------|
| Stage 1 | <ul style="list-style-type: none"> <li>▪ 15 minutes warm up consisting of preparatory stretches.</li> </ul>                                                   |
| Stage 2 | <ul style="list-style-type: none"> <li>▪ Up to 25 minutes of cardiovascular (CV) exercise and resistance-based training with active recovery (AR).</li> </ul> |
| Stage 3 | <ul style="list-style-type: none"> <li>▪ 15 minute cool down period including maintenance stretches</li> </ul>                                                |

Table 5. Stages of Cardiac Prehabilitation Programme

### *Home exercise programme*

Participants will be asked to perform up to 45 minutes of exercise at home (unsupervised) up to 7 times a week during the 4-week intervention period. This exercise will be tailored to the individual participant's ability based upon their physical fitness assessment and their baseline 6MWT results. Progress will be discussed with the participant once a week during the prehabilitation classes. As this is unsupervised, the intensity will be lower than that prescribed for the

supervised classes. Participants will be set achievable targets and have their exercise progressed if they have managed comfortably during the week as measured by their self-reported Borg scores and diaries.

### *High Intensity-Inspiratory Muscle Training (HI-IMT)*

Participants will be asked to perform HI-IMT twice a day for 4 weeks at home starting from their first supervised exercise session. Using their device, participants will be asked to breathe in as forcefully as possible before slowly breathing out 6 times, then rest, before performing another set of 6 breaths. There will be 6 sets of 6 breaths in each HI-IMT training session. The resting time between the sets starts at 60 seconds and decreases by 15 seconds after each set, ending with a rest period of five seconds before the final set.

The device will be set at 50% of their MIP. Participants will be shown how to increase or decrease the resistance on their device to train with a difficulty level of “somewhat hard”, which is equivalent to a Borg score of 12 to 13. This will be highlighted in the instruction booklet/diary. Participants will have their HI-IMT technique checked once a week during their prehabilitation classes to ensure they are training effectively.

### *End of Intervention*

The end of the intervention is the final prehabilitation class. On completion of the 4-week intervention period participants will be encouraged to continue with home exercise and IMT independently until their day of surgery and document any activity in their patient diary.

### *Fidelity of the intervention*

The five domains of the treatment fidelity framework, provided by the National Institutes of Health's Behavioral Change Consort will be assessed to ensure fidelity of the prehabilitation intervention throughout the trial(26). Table 6 details these domains.

|   |                                                                                                                                                                                                                          |
|---|--------------------------------------------------------------------------------------------------------------------------------------------------------------------------------------------------------------------------|
| 1 | Study design issues will ensure the “treatment dose” in each condition is fixed                                                                                                                                          |
| 2 | Monitoring and improving the intervention will involve standardising the process by providing interventionists with a protocol                                                                                           |
| 3 | Fidelity of intervention delivery will involve a single observation of an exercise class to ensure delivery is per-protocol. A checklist will then be completed at 6 monthly intervals to ensure consistency in delivery |
| 4 | Receipt of treatment by patients (did they understand how to undergo the exercises)                                                                                                                                      |
| 5 | Enactment of treatment skills by patients (e.g. did they engage in a home exercise program) will be assessed during focus groups conducted within the qualitative sub-study                                              |

Table 6. 5 Domains of the treatment fidelity framework in line with assessments to record fidelity

In addition to the above, self-monitoring data will be collected via exercise diaries.

## Assessment of Compliance

Self-reported patient diaries and prehabilitation attendance records will be used to measure adherence to the intervention. Adherence was defined as completing 50% of the supervised exercise classes (4 out of 8 sessions) in-line with documented adherence rates to cardiac rehabilitation(27-29). Exercise diaries will capture the physical activity completion for the unsupervised component.

## Patient Public Involvement (PPI)

Patients and members of the public were involved in identifying prehabilitation in this population as a research priority and in design of the trial. Cardiac rehabilitation patients were consulted in the development of the prehabilitation intervention and relevant trial documentation. A patient representative is a member of the Trial Oversight Committee (TOC) to ensure PPI input throughout the entirety of the trial. Findings will also be disseminated to participants and relevant patient groups.

## End of trial

The end of the clinical trial is defined as the 12 week follow up of the last participant. Data queries will be addressed for a period of up to 3 months following this. Participants may choose to withdraw from the trial at any time. Clinicians may also choose to withdraw participants at any time for reasons including non-compliance, adverse events and pregnancy.

## Safety reporting

The safety of delivering a prehabilitation intervention a key outcome of the trial. Although there is now some evidence of a low risk to patient safety from studies where physical activity has been assessed in patients with cardiac and/or pulmonary conditions, there is no such evidence in patients with severe cardiac conditions awaiting cardiac surgery.

To mitigate any safety concerns of participants, clinician and other stakeholders, the trial is designed so that the most intensive exercise intervention will be carried out within a hospital setting. Lower intensity exercise will be prescribed at home after assessment each week by the trial team.

Adverse events and serious adverse events will be collected and monitored throughout the trial. Due to the nature of the study population identified expected adverse events including; angina, breathlessness, light-headedness, arrhythmia and fatigue.

The relationship between the intervention (prehabilitation) and the occurrence of each AE will be assessed and categorised by the Chief Investigator (or delegate). Serious events that are unexpected and related, will be reported to the REC committee within 15 days of notification.

It is crucial that safety is monitored throughout the trial so that any findings may be used in future trials, particularly when considering if this practice can be circulated across the wider community and out of hospitals settings.

## Statistical analysis

---

Primary and secondary outcomes will be analysed following the intention-to-treat principle, with patients analysed according to randomisation regardless of whether they actually received or adhered to the allocated treatment. Per-protocol and as-treated analyses may be conducted as sensitivity and exploratory analyses. A full statistical analysis plan will be developed and agreed with the Trial Oversight Committee before data collection is completed. Data will be analysed at the end of the study; no interim outcome analyses are planned.

The primary analysis testing the impact of the cardiac prehabilitation programme on pre-operative functional exercise capacity (measured by 6MWD) will be based on a linear mixed-effects model accounting for baseline randomisation factors, except for baseline 6MWD which is explicitly incorporated in the model to calculate change from baseline. The model will account for intra-patient correlation using a random intercept model. Subgroup analyses conducted for the primary outcome will be pre-specified in the analysis plan. All continuous secondary outcomes will be analysed using the same approach as used for the primary outcome. All non-continuous data will be analysed in the same way, but with a generalised linear model using the appropriate distributional assumptions and link function. Descriptive analysis will be used to explore outcomes related to the feasibility of the trial. Analyses will be conducted using R statistical software.

## Sample size

The sample size is based on detecting a significant improvement in 6MWD after the prehabilitation program compared with the 6MWD at baseline. We have assumed a minimal clinically important difference in 6MWD of 25m with a standard deviation of 56.5m for pre-operative participants(30). Based on detecting a medium effect size of 0.44, 164 participants (82 in each group) will provide 80% power to detect a difference of 25 metres in the 6MWD. Adjusting for 10% missing data, 180 participants will be recruited for the trial.

## Data

Data will be entered at site onto an electronic case report form for each participant. The database will be hosted by Sealed Envelope© who abide by GDPR and are responsible for the security of the data contained within the database.

Data will be used according to the provision of GDPR, and applicable new regulations, and individuals will not be identifiable through any reports or publications that result from the trial. Quality control measures will ensure that all data are reliable and have been processed accurately at every stage of the study. Source Data Validations (SDV) will be undertaken by the Trial Management staff to optimise data quality for key data including primary/secondary outcome variables and SAE data.

## *Trial Oversight Committee*

An independent Trial Oversight Committee (TOC) will monitor data completion rates and safety reporting throughout the duration of the trial. Data collected in the trial will be used to support other research in the future, and may be shared anonymously with other researchers.

## Ethics and Dissemination

---

The PrEPS trial was granted a favourable opinion by the Yorkshire and Humber, Sheffield Research Ethics Committee on the 25/10/2019 (19/YH/0317). Trial findings will be disseminated to patients using patients focused literature, visual aids and animated films via patient charities like Heart Valve Voice and the British Heart Foundation national PPI group. Dissemination to clinicians and professional stakeholders like commissioners will be through peer reviewed publication and conferences. Any changes to the protocol will be communicated to all relevant parties as per the HREC requirements.

## Discussion

---

Prehabilitation in cardiac surgery has lagged behind that for other specialties, especially cancer surgery, abdominal general surgery and limb reconstruction surgery in the UK(31). This is despite the fact that large numbers of patients undergo cardiac surgery in the UK every year (around 35,000). Moreover, cardiac surgery patients in particular stand to benefit from a prehabilitation interventions because they tend to be older, mean age 67 years and increasing(1) and have a higher co-morbid burden (average Charlson score 2.1 vs 1.7) (GIRFT Programme National Specialty Report). In particular, they suffer from high levels of obesity, diabetes, coexisting lung disease and reduced mobility. The chronic nature of most cardiac conditions prior to reaching the point of surgical intervention and the fact that the cardiac disease process itself usually limits physical activity, means that patients awaiting cardiac surgery usually exhibit a high prevalence of frailty and loss of muscle mass and function, a condition usually referred to as sarcopenia(32-34).

In 2019 our group published a review of 483 publications, of which 10 (including 4 metaanalysis and 6 RCTs) represented the best evidence to answer the clinical question 'does pre-habilitation improve outcomes in cardiac surgical patients?'(35). The RCTs were limited by small sample sizes (the smallest had a sample size of 15) and no trial combined physical activity and IMT (the 2 interventions with the largest evidence base of impact for outcomes) as components in the intervention. A subsequent systematic review which explored associations between objectively measured physical activity during the prehabilitation period and health-related outcomes across surgery types reported significant beneficial associations(36).

The significant benefit of prehabilitation in other therapeutic areas and the scarcity of high quality evidence in cardiac surgery patients identifies an urgent need to provide further data in this area.

## Anticipated Impact

This will be the largest ever RCT investigating the impact of a prehabilitation intervention composed of exercise and IMT in patients with severe cardiac disease awaiting elective cardiac surgery. The findings will establish if such an intervention is feasible and if it is effective in improving overall functional exercise capacity prior to surgery. It will also indicate if there are any impacts on clinical outcome after surgery.

## Trial status

The PrEPS trial opened to recruitment in November 2019, just prior to the start of the global pandemic. The restrictions imposed by the COVID-19 pandemic has had a significant impact on recruitment, elective cardiac surgery and the ability to deliver the prehabilitation intervention. Despite these challenges PrEPS continues to recruit patients and is projected complete follow up data collection by early 2023.

## Acknowledgements

We would like to thank HRUK for their funding and on-going support of the PrEPS trial with an extension to ensure this clinically important trial is seen through to completion.

The successful delivery of PrEPS would not have been possible without the support from the cardiac surgeons at the James Cook University Hospital (*Simon Kendall, Andrew Goodwin, Andrew Owens, Ralph White, Mazzy Kanani and Danai Karamanou*), Newcastle CTU and the cardiac research and rehab delivery teams (*Jon Pritchard, Jess Wigham, Carmen Neave, Karen Ainsworth, Lyn Whitehouse, Louise Sarginson and Fiona Bowe*).

## Author contributions

All authors meet the criteria for authorship stated in the Uniform Requirements for Manuscripts Submitted to Biomedical Journals (ICMJE).

1. Enoch Akowuah - devised the clinical question, applied for funding, Chief investigator with overall responsibility for the trial, reviewed and contributed to all areas of the manuscript
2. Ayesha Mathias - Trial manager with day to day responsibility for delivery of the trial, drafted all areas of the manuscript and contributed to all areas
3. Michelle Bardgett - Senior trial manager, author of the trial protocol, governance oversight, contributed to all areas of manuscript
4. Samantha Harrison - Contributed specifically to the Qualitative Sub-Study and Intervention Design and Delivery sections within the manuscript
5. Adetayo Kasim - General oversight of the Statistical Analysis section of the manuscript and overall review of whole manuscript
6. Kirsti Loughran - Contributed specifically to the Qualitative Sub-Study section within the manuscript



- 1 7. Emmanuel Ogundimu - Statistical oversight and contributed specifically to the Statistical Analysis
- 2 8. Jason Trevis - Contributed specifically to the Qualitative Sub-Study section within the manuscript
- 3 9. Janelle Wagnild - Drafted and contributed specifically to the Statistical Analysis and accelerometer sub-study
- 4 sections of the manuscript
- 5
- 6 10. Pasan Witharana - Contributed specifically to the Qualitative Sub-Study section within the manuscript
- 7
- 8 11. Helen Hancock - Co-Applicant, Protocol Author, general overview and contribution to all areas within
- 9 manuscript
- 10
- 11 12. Rebecca Maier - Co-Applicant, Protocol Author, general overview and contribution to all areas within
- 12 manuscript
- 13
- 14
- 15
- 16

17 Several reviews of the manuscript took place prior to a final draft with all authors reviewing the final draft once  
18 complete prior to submission. All authors are informed of any revisions that may need to take place following editorial  
19 review and confirm these changes are acceptable prior to re-submission.  
20  
21

## 22 Declaration of Competing Interests

23 There are no competing interests to declare.  
24  
25

## 26 Funding Statement

27 The PrEPS trial is funded by Heart Research UK (RG2671/18/20) and Research Capacity Funding from South Tees NFH.  
28  
29

## 30 References:

- 31 1. Grant SWaJ, David P. National Cardiac Surgery Activity and Outcomes Report 2002-20162017.
- 32 2. Wang W, Bagshaw SM, Norris CM, Zibdawi R, Zibdawi M, MacArthur R, et al. Association between older age  
33 and outcome after cardiac surgery: a population-based cohort study. J Cardiothorac Surg. 2014;9:177.
- 34 3. Wynter-Blyth V, Moorthy K. Prehabilitation: preparing patients for surgery. BMJ. 2017;358:j3702.
- 35 4. Sui X, Laditka JN, Hardin JW, Blair SN. Estimated functional capacity predicts mortality in older adults. J Am  
36 Geriatr Soc. 2007;55(12):1940-7.
- 37 5. Mandsager K, Harb S, Cremer P, Phelan D, Nissen SE, Jaber W. Association of Cardiorespiratory Fitness With  
38 Long-term Mortality Among Adults Undergoing Exercise Treadmill Testing. JAMA Netw Open. 2018;1(6):e183605.
- 39
- 40
- 41
- 42
- 43
- 44
- 45
- 46
- 47
- 48
- 49
- 50
- 51
- 52
- 53
- 54
- 55
- 56
- 57
- 58
- 59
- 60

- 1 6. Group JJW. Guidelines for rehabilitation in patients with cardiovascular disease (JCS 2012). *Circ J*.  
2 2014;78(8):2022-93.  
3
- 4 7. Tueller C, Kern L, Azzola A, Baty F, Condrau S, Wiegand J, et al. Six-minute walk test enhanced by mobile  
5 telemetric cardiopulmonary monitoring. *Respiration*. 2010;80(5):410-8.  
6  
7
- 8 8. Argunova Y, Belik E, Gruzdeva O, Ivanov S, Pomeskina S, Barbarash O. Effects of Physical Prehabilitation on  
9 the Dynamics of the Markers of Endothelial Function in Patients Undergoing Elective Coronary Bypass Surgery. *J Pers*  
10 *Med*. 2022;12(3).  
11  
12  
13
- 14 9. Boidin M, Gayda M, Henri C, Hayami D, Trachsel LD, Besnier F, et al. Effects of interval training on risk  
15 markers for arrhythmic death: a randomized controlled trial. *Clin Rehabil*. 2019;33(8):1320-30.  
16  
17  
18
- 19 10. McCann M, Stamp N, Ngui A, Litton E. Cardiac Prehabilitation. *J Cardiothorac Vasc Anesth*. 2019;33(8):2255-  
20 65.  
21  
22  
23
- 24 11. Hulzebos EH, Smit Y, Helders PP, van Meeteren NL. Preoperative physical therapy for elective cardiac surgery  
25 patients. *Cochrane Database Syst Rev*. 2012;11:CD010118.  
26  
27
- 28 12. Katsura M, Kuriyama A, Takeshima T, Fukuhara S, Furukawa TA. Preoperative inspiratory muscle training for  
29 postoperative pulmonary complications in adults undergoing cardiac and major abdominal surgery. *Cochrane*  
30 *Database Syst Rev*. 2015(10):CD010356.  
31  
32  
33
- 34 13. Mans CM, Reeve JC, Elkins MR. Postoperative outcomes following preoperative inspiratory muscle training in  
35 patients undergoing cardiothoracic or upper abdominal surgery: a systematic review and meta analysis. *Clin Rehabil*.  
36 2015;29(5):426-38.  
37  
38  
39
- 40 14. Snowdon D, Haines TP, Skinner EH. Preoperative intervention reduces postoperative pulmonary  
41 complications but not length of stay in cardiac surgical patients: a systematic review. *J Physiother*. 2014;60(2):66-77.  
42  
43
- 44 15. Lai FY, Abbasciano RG, Tabberer B, Kumar T, Murphy GJ, Partnership SGotJLAHSPS. Identifying research  
45 priorities in cardiac surgery: a report from the James Lind Alliance Priority Setting Partnership in adult heart surgery.  
46 *BMJ Open*. 2020;10(9):e038001.  
47  
48  
49
- 50 16. Ramos RJ, Ladha KS, Cuthbertson BH, Shulman MA, Myles PS, Wijesundera DN, et al. Association of six-  
51 minute walk test distance with postoperative complications in non-cardiac surgery: a secondary analysis of a  
52 multicentre prospective cohort study. *Can J Anaesth*. 2021;68(4):514-29.  
53  
54  
55
- 56 17. Sumin AN, Oleinik PA, Bezdenezhnykh AV, Bezdenezhnykh NA. Factors Determining the Functional State of  
57 Cardiac Surgery Patients with Complicated Postoperative Period. *Int J Environ Res Public Health*. 2022;19(7).  
58  
59  
60

- 1 18. Chen YC, Chen KC, Lu LH, Wu YL, Lai TJ, Wang CH. Validating the 6-minute walk test as an indicator of  
2 recovery in patients undergoing cardiac surgery: A prospective cohort study. *Medicine (Baltimore)*.  
3 2018;97(42):e12925.  
4
- 5  
6 19. Laboratories ACoPSfCPF. ATS statement: guidelines for the six-minute walk test. *Am J Respir Crit Care Med*.  
7 2002;166(1):111-7.  
8
- 9  
10 20. Society ATSER. ATS/ERS Statement on respiratory muscle testing. *Am J Respir Crit Care Med*.  
11 2002;166(4):518-624.  
12
- 13  
14  
15 21. Brooks R. EuroQol: the current state of play. *Health Policy*. 1996;37(1):53-72.  
16
- 17  
18 22. Zigmond AS, Snaith RP. The hospital anxiety and depression scale. *Acta Psychiatr Scand*. 1983;67(6):361-70.  
19
- 20  
21 23. Migueles J, Rowlands A, Huber F, Sabia S, van hees V. GGIR:  
22  
23 A Research Community–Driven Open Source R Package for Generating Physical  
24  
25 Activity and Sleep Outcomes From Multi-Day Raw Accelerometer Data. *Journal for the Measurement of Physical*  
26  
27 Behaviour. 2019;2(3).  
28
- 29  
30 24. Braun V, Clarke V. Using thematic analysis in psychology. *Qualitative Research in Psychology*. 2006;3(2):77-  
31 101.  
32
- 33  
34 25. May CR, Cummings A, Girling M, Bracher M, Mair FS, May CM, et al. Using Normalization Process Theory in  
35 feasibility studies and process evaluations of complex healthcare interventions: a systematic review. *Implement Sci*.  
36 2018;13(1):80.  
37
- 38  
39  
40 26. Bellg AJ, Borrelli B, Resnick B, Hecht J, Minicucci DS, Ory M, et al. Enhancing treatment fidelity in health  
41 behavior change studies: best practices and recommendations from the NIH Behavior Change Consortium. *Health*  
42  
43 Psychol. 2004;23(5):443-51.  
44
- 45  
46 27. Tavella R, O'Toole K, Tirimacco R, Lloyd A, Pennington K, Drilling S, et al. Cardiac  
47  
48 rehabilitation referral and completion: results from the South Australian  
49  
50 minimum dataset for cardiac rehabilitation programs. . 2015.  
51
- 52  
53 28. Higgins RO, Murphy BM, Goble AJ, Le Grande MR, Elliott PC, Worcester MU. Cardiac rehabilitation program  
54 attendance after coronary artery bypass surgery: overcoming the barriers. *Med J Aust*. 2008;188(12):712-4.  
55
- 56  
57 29. Gallagher R, McKinley S, Dracup K. Predictors of women's attendance at cardiac rehabilitation programs.  
58  
59 *Prog Cardiovasc Nurs*. 2003;18(3):121-6.  
60

- 1 30. Gremeaux V, Troisgros O, Benaïm S, Hannequin A, Laurent Y, Casillas JM, et al. Determining the minimal  
2 clinically important difference for the six-minute walk test and the 200-meter fast-walk test during cardiac  
3 rehabilitation program in coronary artery disease patients after acute coronary syndrome. *Arch Phys Med Rehabil.*  
4 2011;92(4):611-9.  
5  
6  
7  
8 31. Prehabilitation for people with cancer2020.  
9  
10  
11 32. Joshi A, Mancini R, Probst S, Abikhzer G, Langlois Y, Morin JF, et al. Sarcopenia in cardiac surgery: Dual X-ray  
12 absorptiometry study from the McGill frailty registry. *Am Heart J.* 2021;239:52-8.  
13  
14  
15 33. Okamura H, Kimura N, Tanno K, Mieno M, Matsumoto H, Yamaguchi A, et al. How is preoperative sarcopenia  
16 assessed in patients undergoing heart valve surgery? *J Thorac Cardiovasc Surg.* 2019;157(4):e199-e200.  
17  
18  
19 34. Yuenyongchaiwat K, Kulchanarat C, Satdhabudha O. Sarcopenia in open heart surgery patients: A cohort  
20 study. *Heliyon.* 2020;6(12):e05759.  
21  
22  
23  
24 35. Sandhu MS, Akowuah EF. Does prehabilitation improve outcomes in cardiac surgical patients? *Interact*  
25 *Cardiovasc Thorac Surg.* 2019;29(4):608-11.  
26  
27  
28 36. Wagnild JM, Akowuah E, Maier RH, Hancock HC, Kasim A. Impact of prehabilitation on objectively measured  
29 physical activity levels in elective surgery patients: a systematic review. *BMJ Open.* 2021;11(9):e049202.  
30  
31  
32  
33  
34

35 **Figure 1. Consort Diagram to show research activity in the PrEPS trial** – this consort diagram depicts the stages  
36 throughout the trial from screening, randomisation, intervention and through the various follow up stages. A summary of  
37 what assessments are conducted is provided at each stage.  
38  
39  
40  
41  
42  
43  
44  
45  
46  
47  
48  
49  
50  
51  
52  
53  
54  
55  
56  
57  
58  
59  
60

# PREHABILITATION IN ELECTIVE PATIENTS UNDERGOING CARDIAC SURGERY: A RANDOMISED CONTROL TRIAL (THE PrEPS TRIAL)

## Figures



Figure 1. Consort Diagram to show research activity in the PrEPS trial

## CONSENT FORM

### Prehabilitation in Elective Patients Undergoing Cardiac Surgery (PrEPS)

Name of Researcher: [Recruiting Centre PI to be entered]

Participant Identification Number for this trial: \_ \_ \_ \_ \_

**Please INITIAL the box where you agree. Please note that statement 9 is optional:**

1. I confirm that I have read the information sheet dated .....  
(version .....) for the above trial. I have has the opportunity to consider the  
information, ask questions and have had these answered satisfactorily.
2. I understand that my participation is voluntary and that I am free to withdraw at any  
time without giving any reason, without my medical care or legal rights being  
affected.
3. I understand that relevant sections of my medical notes and data collected during  
the study, may be looked at by individuals from Newcastle Clinical Trials Unit, from  
regulatory authorities or from the NHS Trust, where it is relevant to my taking part  
in this research. I give permission for these individuals to have access to my  
records
4. I understand that anonymised information about me relevant to the trial will be held  
on a secure database, which is hosted on an external server and will be transferred  
to individuals within the research team including members at Newcastle and  
Durham University for analysis. All data will be anonymised using a participant  
identification number and stored securely on restricted servers for a period of 7  
years after the end of the trial. Any publications resulting from this trial will not  
include any personal identifiable information
5. I understand that the information collected about me will be used to support other  
research in the future, and may be shared anonymously with other researchers

NHS Recruiting Centre logo

and relevant contact details to be entered

1  
2  
3  
4  
5  
6  
7 6. I agree to my General Practitioner being informed of my participation in the trial,   
8 including any necessary exchange of information about me between my GP and  
9 the research team.

10  
11  
12  
13  
14 7. I understand that if I lose the capacity to decide about my healthcare changes   
15 during the trial,  
16  
17 I will not be asked to undertake any further trial activity, however routinely collected  
18 information relevant to the trial may be collected.  
19  
20  
21  
22

23  
24 8. I agree to take part in the above trial.   
25  
26  
27

Optional:

28  
29  
30  
31  
32 9. I have been offered the opportunity to take part in the trials activity monitor sub   
33 study. I have been provided with information and understand what this entails. I  
34 agree to take part in the sub study.  
35  
36  
37  
38  
39  
40  
41

42 \_\_\_\_\_  
43 Name of Participant Date Signature

44  
45  
46  
47 \_\_\_\_\_  
48 Name of Person taking consent Date Signature  
49  
50  
51  
52  
53  
54  
55  
56  
57  
58  
59  
60

When completed: 1 for participant; 1 for researcher site file; 1 to be kept in medical notes

## QUALITATIVE CONSENT FORM

# Prehabilitation in Elective Patients Undergoing Cardiac Surgery (PrEPS)

Name of Researcher: *Mr Enoch Akowuah*

Participation is entirely optional, and non-participation will have no detrimental effects upon your ongoing care/participation in the primary clinical trial. You are free to withdraw yourself from the sub-study at any point, without any detrimental impact.

**Please read the following statements, initial the boxes next to them and sign below.**

- I have read the patient/HCP information sheet dated ..... ((Version.....) and understand what the PrEPS sub-study entails.
- I consent to my details being passed to and being contacted by the qualitative research team.
- I consent to participate in a focus group.
- I consent to being audio recorded during a focus group.
- I understand that if participating in an online focus group my email address may be visible to other participants
- I consent to the audio of my conversation at said focus group being passed to a professional transcription service.
- I am aware that I may withdraw myself from this sub-study at any time up to and during the focus group and any data already collected will remain in the study.
- I consent to the data generated being anonymised and published for academic purposes.

|  |
|--|
|  |
|  |
|  |
|  |
|  |
|  |
|  |
|  |

|                            |                                      |
|----------------------------|--------------------------------------|
| Print name of participant: | Print name of person taking consent: |
| Signature of participant:  | Signature of person taking consent:  |
| Date:                      |                                      |



# Reporting checklist for protocol of a clinical trial.

Based on the SPIRIT guidelines.

## Instructions to authors

Complete this checklist by entering the page numbers from your manuscript where readers will find each of the items listed below.

Your article may not currently address all the items on the checklist. Please modify your text to include the missing information. If you are certain that an item does not apply, please write "n/a" and provide a short explanation.

Upload your completed checklist as an extra file when you submit to a journal.

In your methods section, say that you used the SPIRIT reporting guidelines, and cite them as:

Chan A-W, Tetzlaff JM, Gøtzsche PC, Altman DG, Mann H, Berlin J, Dickersin K, Hróbjartsson A, Schulz KF, Parulekar WR, Krleža-Jerić K, Laupacis A, Moher D. SPIRIT 2013 Explanation and Elaboration: Guidance for protocols of clinical trials. *BMJ*. 2013;346:e7586

|                                   | Reporting Item                                                                                                         | Page Number |
|-----------------------------------|------------------------------------------------------------------------------------------------------------------------|-------------|
| <b>Administrative information</b> |                                                                                                                        |             |
| Title                             | <u>#1</u> Descriptive title identifying the study design, population, interventions, and, if applicable, trial acronym | Page 1      |

|    |                     |                     |                                                    |                    |
|----|---------------------|---------------------|----------------------------------------------------|--------------------|
| 1  | Trial registration  | <a href="#">#2a</a> | Trial identifier and registry name. If not yet     | Page 2             |
| 2  |                     |                     | registered, name of intended registry              |                    |
| 3  |                     |                     |                                                    |                    |
| 4  |                     |                     |                                                    |                    |
| 5  |                     |                     |                                                    |                    |
| 6  | Trial registration: | <a href="#">#2b</a> | All items from the World Health Organization       | Met across         |
| 7  |                     |                     |                                                    |                    |
| 8  | data set            |                     | Trial Registration Data Set                        | various pages      |
| 9  |                     |                     |                                                    |                    |
| 10 |                     |                     |                                                    |                    |
| 11 |                     |                     |                                                    | within manuscript. |
| 12 |                     |                     |                                                    |                    |
| 13 |                     |                     |                                                    |                    |
| 14 | Protocol version    | <a href="#">#3</a>  | Date and version identifier                        | Page 2             |
| 15 |                     |                     |                                                    |                    |
| 16 |                     |                     |                                                    |                    |
| 17 | Funding             | <a href="#">#4</a>  | Sources and types of financial, material, and      | Page 14            |
| 18 |                     |                     | other support                                      |                    |
| 19 |                     |                     |                                                    |                    |
| 20 |                     |                     |                                                    |                    |
| 21 |                     |                     |                                                    |                    |
| 22 | Roles and           | <a href="#">#5a</a> | Names, affiliations, and roles of protocol         | Page 1             |
| 23 |                     |                     |                                                    |                    |
| 24 | responsibilities:   |                     | contributors                                       |                    |
| 25 |                     |                     |                                                    |                    |
| 26 | contributorship     |                     |                                                    |                    |
| 27 |                     |                     |                                                    |                    |
| 28 |                     |                     |                                                    |                    |
| 29 |                     |                     |                                                    |                    |
| 30 | Roles and           | <a href="#">#5b</a> | Name and contact information for the trial         | Page 1             |
| 31 |                     |                     |                                                    |                    |
| 32 | responsibilities:   |                     | sponsor                                            |                    |
| 33 |                     |                     |                                                    |                    |
| 34 | sponsor contact     |                     |                                                    |                    |
| 35 |                     |                     |                                                    |                    |
| 36 | information         |                     |                                                    |                    |
| 37 |                     |                     |                                                    |                    |
| 38 |                     |                     |                                                    |                    |
| 39 |                     |                     |                                                    |                    |
| 40 | Roles and           | <a href="#">#5c</a> | Role of study sponsor and funders, if any, in      | Not included due   |
| 41 |                     |                     |                                                    |                    |
| 42 | responsibilities:   |                     | study design; collection, management, analysis,    | to word limit –    |
| 43 |                     |                     |                                                    |                    |
| 44 | sponsor and funder  |                     | and interpretation of data; writing of the report; | within protocol    |
| 45 |                     |                     |                                                    |                    |
| 46 |                     |                     |                                                    |                    |
| 47 |                     |                     | and the decision to submit the report for          | itself             |
| 48 |                     |                     |                                                    |                    |
| 49 |                     |                     | publication, including whether they will have      |                    |
| 50 |                     |                     |                                                    |                    |
| 51 |                     |                     | ultimate authority over any of these activities    |                    |
| 52 |                     |                     |                                                    |                    |
| 53 |                     |                     |                                                    |                    |
| 54 |                     |                     |                                                    |                    |
| 55 |                     |                     |                                                    |                    |
| 56 |                     |                     |                                                    |                    |
| 57 |                     |                     |                                                    |                    |
| 58 |                     |                     |                                                    |                    |
| 59 |                     |                     |                                                    |                    |
| 60 |                     |                     |                                                    |                    |

|    |                      |                     |                                                     |          |
|----|----------------------|---------------------|-----------------------------------------------------|----------|
| 1  | Roles and            | <a href="#">#5d</a> | Composition, roles, and responsibilities of the     | Page 10  |
| 2  |                      |                     |                                                     |          |
| 3  | responsibilities:    |                     | coordinating centre, steering committee, endpoint   |          |
| 4  |                      |                     |                                                     |          |
| 5  | committees           |                     | adjudication committee, data management team,       |          |
| 6  |                      |                     |                                                     |          |
| 7  |                      |                     | and other individuals or groups overseeing the      |          |
| 8  |                      |                     |                                                     |          |
| 9  |                      |                     | trial, if applicable (see Item 21a for data         |          |
| 10 |                      |                     |                                                     |          |
| 11 |                      |                     | monitoring committee)                               |          |
| 12 |                      |                     |                                                     |          |
| 13 |                      |                     |                                                     |          |
| 14 |                      |                     |                                                     |          |
| 15 | <b>Introduction</b>  |                     |                                                     |          |
| 16 |                      |                     |                                                     |          |
| 17 |                      |                     |                                                     |          |
| 18 | Background and       | <a href="#">#6a</a> | Description of research question and justification  | Page 3-4 |
| 19 |                      |                     |                                                     |          |
| 20 | rationale            |                     | for undertaking the trial, including summary of     |          |
| 21 |                      |                     |                                                     |          |
| 22 |                      |                     | relevant studies (published and unpublished)        |          |
| 23 |                      |                     |                                                     |          |
| 24 |                      |                     | examining benefits and harms for each               |          |
| 25 |                      |                     |                                                     |          |
| 26 |                      |                     | intervention                                        |          |
| 27 |                      |                     |                                                     |          |
| 28 |                      |                     |                                                     |          |
| 29 |                      |                     |                                                     |          |
| 30 |                      |                     |                                                     |          |
| 31 | Background and       | <a href="#">#6b</a> | Explanation for choice of comparators               | Page 3-4 |
| 32 |                      |                     |                                                     |          |
| 33 | rationale: choice of |                     |                                                     |          |
| 34 |                      |                     |                                                     |          |
| 35 | comparators          |                     |                                                     |          |
| 36 |                      |                     |                                                     |          |
| 37 |                      |                     |                                                     |          |
| 38 | Objectives           | <a href="#">#7</a>  | Specific objectives or hypotheses                   | Page 5   |
| 39 |                      |                     |                                                     |          |
| 40 |                      |                     |                                                     |          |
| 41 | Trial design         | <a href="#">#8</a>  | Description of trial design including type of trial | Page 4-5 |
| 42 |                      |                     |                                                     |          |
| 43 |                      |                     | (eg, parallel group, crossover, factorial, single   |          |
| 44 |                      |                     |                                                     |          |
| 45 |                      |                     | group), allocation ratio, and framework (eg,        |          |
| 46 |                      |                     |                                                     |          |
| 47 |                      |                     | superiority, equivalence, non-inferiority,          |          |
| 48 |                      |                     |                                                     |          |
| 49 |                      |                     | exploratory)                                        |          |
| 50 |                      |                     |                                                     |          |
| 51 |                      |                     |                                                     |          |
| 52 |                      |                     |                                                     |          |
| 53 |                      |                     |                                                     |          |
| 54 | <b>Methods:</b>      |                     |                                                     |          |
| 55 |                      |                     |                                                     |          |
| 56 | <b>Participants,</b> |                     |                                                     |          |
| 57 |                      |                     |                                                     |          |
| 58 |                      |                     |                                                     |          |
| 59 |                      |                     |                                                     |          |
| 60 |                      |                     |                                                     |          |

1 **interventions, and**

2  
3 **outcomes**

4  
5

|    |                      |                      |                                                                                                                                                                                                  |           |
|----|----------------------|----------------------|--------------------------------------------------------------------------------------------------------------------------------------------------------------------------------------------------|-----------|
| 6  | Study setting        | <a href="#">#9</a>   | Description of study settings (eg, community clinic, academic hospital) and list of countries where data will be collected. Reference to where list of study sites can be obtained               | Page 4-5  |
| 7  |                      |                      |                                                                                                                                                                                                  |           |
| 8  |                      |                      |                                                                                                                                                                                                  |           |
| 9  |                      |                      |                                                                                                                                                                                                  |           |
| 10 |                      |                      |                                                                                                                                                                                                  |           |
| 11 |                      |                      |                                                                                                                                                                                                  |           |
| 12 |                      |                      |                                                                                                                                                                                                  |           |
| 13 |                      |                      |                                                                                                                                                                                                  |           |
| 14 |                      |                      |                                                                                                                                                                                                  |           |
| 15 | Eligibility criteria | <a href="#">#10</a>  | Inclusion and exclusion criteria for participants. If applicable, eligibility criteria for study centres and individuals who will perform the interventions (eg, surgeons, psychotherapists)     | Page 5    |
| 16 |                      |                      |                                                                                                                                                                                                  |           |
| 17 |                      |                      |                                                                                                                                                                                                  |           |
| 18 |                      |                      |                                                                                                                                                                                                  |           |
| 19 |                      |                      |                                                                                                                                                                                                  |           |
| 20 |                      |                      |                                                                                                                                                                                                  |           |
| 21 |                      |                      |                                                                                                                                                                                                  |           |
| 22 |                      |                      |                                                                                                                                                                                                  |           |
| 23 |                      |                      |                                                                                                                                                                                                  |           |
| 24 |                      |                      |                                                                                                                                                                                                  |           |
| 25 | Interventions:       | <a href="#">#11a</a> | Interventions for each group with sufficient detail to allow replication, including how and when they will be administered                                                                       | Page 8-10 |
| 26 |                      |                      |                                                                                                                                                                                                  |           |
| 27 | description          |                      |                                                                                                                                                                                                  |           |
| 28 |                      |                      |                                                                                                                                                                                                  |           |
| 29 |                      |                      |                                                                                                                                                                                                  |           |
| 30 |                      |                      |                                                                                                                                                                                                  |           |
| 31 |                      |                      |                                                                                                                                                                                                  |           |
| 32 |                      |                      |                                                                                                                                                                                                  |           |
| 33 | Interventions:       | <a href="#">#11b</a> | Criteria for discontinuing or modifying allocated interventions for a given trial participant (eg, drug dose change in response to harms, participant request, or improving / worsening disease) | Page 8-10 |
| 34 |                      |                      |                                                                                                                                                                                                  |           |
| 35 | modifications        |                      |                                                                                                                                                                                                  |           |
| 36 |                      |                      |                                                                                                                                                                                                  |           |
| 37 |                      |                      |                                                                                                                                                                                                  |           |
| 38 |                      |                      |                                                                                                                                                                                                  |           |
| 39 |                      |                      |                                                                                                                                                                                                  |           |
| 40 |                      |                      |                                                                                                                                                                                                  |           |
| 41 |                      |                      |                                                                                                                                                                                                  |           |
| 42 |                      |                      |                                                                                                                                                                                                  |           |
| 43 | Interventions:       | <a href="#">#11c</a> | Strategies to improve adherence to intervention protocols, and any procedures for monitoring adherence (eg, drug tablet return; laboratory tests)                                                | Page 8-10 |
| 44 |                      |                      |                                                                                                                                                                                                  |           |
| 45 | adherence            |                      |                                                                                                                                                                                                  |           |
| 46 |                      |                      |                                                                                                                                                                                                  |           |
| 47 |                      |                      |                                                                                                                                                                                                  |           |
| 48 |                      |                      |                                                                                                                                                                                                  |           |
| 49 |                      |                      |                                                                                                                                                                                                  |           |
| 50 |                      |                      |                                                                                                                                                                                                  |           |
| 51 |                      |                      |                                                                                                                                                                                                  |           |
| 52 |                      |                      |                                                                                                                                                                                                  |           |
| 53 | Interventions:       | <a href="#">#11d</a> | Relevant concomitant care and interventions that are permitted or prohibited during the trial                                                                                                    | Page 8-10 |
| 54 |                      |                      |                                                                                                                                                                                                  |           |
| 55 | concomitant care     |                      |                                                                                                                                                                                                  |           |
| 56 |                      |                      |                                                                                                                                                                                                  |           |
| 57 |                      |                      |                                                                                                                                                                                                  |           |
| 58 |                      |                      |                                                                                                                                                                                                  |           |
| 59 |                      |                      |                                                                                                                                                                                                  |           |
| 60 |                      |                      |                                                                                                                                                                                                  |           |

|    |                      |                     |                                                    |         |
|----|----------------------|---------------------|----------------------------------------------------|---------|
| 1  | Outcomes             | <a href="#">#12</a> | Primary, secondary, and other outcomes,            | Page 6  |
| 2  |                      |                     |                                                    |         |
| 3  |                      |                     |                                                    |         |
| 4  |                      |                     | including the specific measurement variable (eg,   |         |
| 5  |                      |                     | systolic blood pressure), analysis metric (eg,     |         |
| 6  |                      |                     | change from baseline, final value, time to event), |         |
| 7  |                      |                     | method of aggregation (eg, median, proportion),    |         |
| 8  |                      |                     | and time point for each outcome. Explanation of    |         |
| 9  |                      |                     | the clinical relevance of chosen efficacy and      |         |
| 10 |                      |                     | harm outcomes is strongly recommended              |         |
| 11 |                      |                     |                                                    |         |
| 12 |                      |                     |                                                    |         |
| 13 |                      |                     |                                                    |         |
| 14 |                      |                     |                                                    |         |
| 15 |                      |                     |                                                    |         |
| 16 |                      |                     |                                                    |         |
| 17 |                      |                     |                                                    |         |
| 18 |                      |                     |                                                    |         |
| 19 |                      |                     |                                                    |         |
| 20 | Participant timeline | <a href="#">#13</a> | Time schedule of enrolment, interventions          | Page 5  |
| 21 |                      |                     | (including any run-ins and washouts),              |         |
| 22 |                      |                     | assessments, and visits for participants. A        |         |
| 23 |                      |                     | schematic diagram is highly recommended (see       |         |
| 24 |                      |                     | Figure)                                            |         |
| 25 |                      |                     |                                                    |         |
| 26 |                      |                     |                                                    |         |
| 27 |                      |                     |                                                    |         |
| 28 |                      |                     |                                                    |         |
| 29 |                      |                     |                                                    |         |
| 30 |                      |                     |                                                    |         |
| 31 |                      |                     |                                                    |         |
| 32 | Sample size          | <a href="#">#14</a> | Estimated number of participants needed to         | Page 12 |
| 33 |                      |                     | achieve study objectives and how it was            |         |
| 34 |                      |                     | determined, including clinical and statistical     |         |
| 35 |                      |                     | assumptions supporting any sample size             |         |
| 36 |                      |                     | calculations                                       |         |
| 37 |                      |                     |                                                    |         |
| 38 |                      |                     |                                                    |         |
| 39 |                      |                     |                                                    |         |
| 40 |                      |                     |                                                    |         |
| 41 |                      |                     |                                                    |         |
| 42 |                      |                     |                                                    |         |
| 43 |                      |                     |                                                    |         |
| 44 | Recruitment          | <a href="#">#15</a> | Strategies for achieving adequate participant      | Page 5  |
| 45 |                      |                     | enrolment to reach target sample size              |         |
| 46 |                      |                     |                                                    |         |
| 47 |                      |                     |                                                    |         |
| 48 |                      |                     |                                                    |         |
| 49 |                      |                     |                                                    |         |

## Methods:

### Assignment of interventions (for controlled trials)

|    |                     |                      |                                                       |            |
|----|---------------------|----------------------|-------------------------------------------------------|------------|
| 1  | Allocation:         | <a href="#">#16a</a> | Method of generating the allocation sequence          | Page 11-12 |
| 2  |                     |                      |                                                       |            |
| 3  | sequence            |                      | (eg, computer-generated random numbers), and          |            |
| 4  |                     |                      |                                                       |            |
| 5  | generation          |                      | list of any factors for stratification. To reduce     |            |
| 6  |                     |                      |                                                       |            |
| 7  |                     |                      |                                                       |            |
| 8  |                     |                      | predictability of a random sequence, details of       |            |
| 9  |                     |                      |                                                       |            |
| 10 |                     |                      | any planned restriction (eg, blocking) should be      |            |
| 11 |                     |                      |                                                       |            |
| 12 |                     |                      | provided in a separate document that is               |            |
| 13 |                     |                      |                                                       |            |
| 14 |                     |                      |                                                       |            |
| 15 |                     |                      | unavailable to those who enrol participants or        |            |
| 16 |                     |                      |                                                       |            |
| 17 |                     |                      | assign interventions                                  |            |
| 18 |                     |                      |                                                       |            |
| 19 |                     |                      |                                                       |            |
| 20 | Allocation          | <a href="#">#16b</a> | Mechanism of implementing the allocation              | Page 11-12 |
| 21 |                     |                      |                                                       |            |
| 22 | concealment         |                      | sequence (eg, central telephone; sequentially         |            |
| 23 |                     |                      |                                                       |            |
| 24 | mechanism           |                      | numbered, opaque, sealed envelopes),                  |            |
| 25 |                     |                      |                                                       |            |
| 26 |                     |                      |                                                       |            |
| 27 |                     |                      | describing any steps to conceal the sequence          |            |
| 28 |                     |                      |                                                       |            |
| 29 |                     |                      | until interventions are assigned                      |            |
| 30 |                     |                      |                                                       |            |
| 31 |                     |                      |                                                       |            |
| 32 | Allocation:         | <a href="#">#16c</a> | Who will generate the allocation sequence, who        | Page 11-12 |
| 33 |                     |                      |                                                       |            |
| 34 | implementation      |                      | will enrol participants, and who will assign          |            |
| 35 |                     |                      |                                                       |            |
| 36 |                     |                      | participants to interventions                         |            |
| 37 |                     |                      |                                                       |            |
| 38 |                     |                      |                                                       |            |
| 39 |                     |                      |                                                       |            |
| 40 | Blinding (masking)  | <a href="#">#17a</a> | Who will be blinded after assignment to               | N/A        |
| 41 |                     |                      |                                                       |            |
| 42 |                     |                      | interventions (eg, trial participants, care           |            |
| 43 |                     |                      |                                                       |            |
| 44 |                     |                      | providers, outcome assessors, data analysts),         |            |
| 45 |                     |                      |                                                       |            |
| 46 |                     |                      |                                                       |            |
| 47 |                     |                      | and how                                               |            |
| 48 |                     |                      |                                                       |            |
| 49 |                     |                      |                                                       |            |
| 50 | Blinding (masking): | <a href="#">#17b</a> | If blinded, circumstances under which unblinding      | N/A        |
| 51 |                     |                      |                                                       |            |
| 52 | emergency           |                      | is permissible, and procedure for revealing a         |            |
| 53 |                     |                      |                                                       |            |
| 54 | unblinding          |                      | participant's allocated intervention during the trial |            |
| 55 |                     |                      |                                                       |            |
| 56 |                     |                      |                                                       |            |
| 57 |                     |                      |                                                       |            |
| 58 |                     |                      |                                                       |            |
| 59 |                     |                      |                                                       |            |
| 60 |                     |                      |                                                       |            |

1 **Methods: Data**

2  
3 **collection,**

4  
5 **management, and**

6  
7 **analysis**

8  
9  
10  
11 Data collection plan [#18a](#) Plans for assessment and collection of outcome, Page 12

12  
13 baseline, and other trial data, including any  
14  
15 related processes to promote data quality (eg,  
16  
17 duplicate measurements, training of assessors)  
18  
19 and a description of study instruments (eg,  
20  
21 questionnaires, laboratory tests) along with their  
22  
23 reliability and validity, if known. Reference to  
24  
25 where data collection forms can be found, if not  
26  
27 in the protocol  
28  
29  
30  
31

32 Data collection [#18b](#) Plans to promote participant retention and In protocol – not  
33  
34 plan: retention complete follow-up, including list of any outcome included in paper  
35  
36 data to be collected for participants who due to word limit  
37  
38 discontinue or deviate from intervention protocols  
39  
40  
41

42 Data management [#19](#) Plans for data entry, coding, security, and Page 12

43  
44 storage, including any related processes to  
45  
46 promote data quality (eg, double data entry;  
47  
48 range checks for data values). Reference to  
49  
50 where details of data management procedures  
51  
52 can be found, if not in the protocol  
53  
54  
55  
56  
57  
58  
59  
60

|    |                        |                      |                                                   |                    |
|----|------------------------|----------------------|---------------------------------------------------|--------------------|
| 1  | Statistics: outcomes   | <a href="#">#20a</a> | Statistical methods for analysing primary and     | Page 11            |
| 2  |                        |                      |                                                   |                    |
| 3  |                        |                      | secondary outcomes. Reference to where other      |                    |
| 4  |                        |                      | details of the statistical analysis plan can be   |                    |
| 5  |                        |                      | found, if not in the protocol                     |                    |
| 6  |                        |                      |                                                   |                    |
| 7  |                        |                      |                                                   |                    |
| 8  |                        |                      |                                                   |                    |
| 9  |                        |                      |                                                   |                    |
| 10 |                        |                      |                                                   |                    |
| 11 | Statistics: additional | <a href="#">#20b</a> | Methods for any additional analyses (eg,          | Page 7-8           |
| 12 | analyses               |                      | subgroup and adjusted analyses)                   |                    |
| 13 |                        |                      |                                                   |                    |
| 14 |                        |                      |                                                   |                    |
| 15 |                        |                      |                                                   |                    |
| 16 | Statistics: analysis   | <a href="#">#20c</a> | Definition of analysis population relating to     | Page 11            |
| 17 | population and         |                      | protocol non-adherence (eg, as randomised         |                    |
| 18 | missing data           |                      | analysis), and any statistical methods to handle  |                    |
| 19 |                        |                      | missing data (eg, multiple imputation)            |                    |
| 20 |                        |                      |                                                   |                    |
| 21 |                        |                      |                                                   |                    |
| 22 |                        |                      |                                                   |                    |
| 23 |                        |                      |                                                   |                    |
| 24 |                        |                      |                                                   |                    |
| 25 |                        |                      |                                                   |                    |
| 26 | <b>Methods:</b>        |                      |                                                   |                    |
| 27 |                        |                      |                                                   |                    |
| 28 | <b>Monitoring</b>      |                      |                                                   |                    |
| 29 |                        |                      |                                                   |                    |
| 30 |                        |                      |                                                   |                    |
| 31 |                        |                      |                                                   |                    |
| 32 | Data monitoring:       | <a href="#">#21a</a> | Composition of data monitoring committee          | N/A – Single Trial |
| 33 | formal committee       |                      | (DMC); summary of its role and reporting          | Oversight          |
| 34 |                        |                      | structure; statement of whether it is independent | Committee in       |
| 35 |                        |                      | from the sponsor and competing interests; and     | place –            |
| 36 |                        |                      | reference to where further details about its      | explanation in     |
| 37 |                        |                      | charter can be found, if not in the protocol.     | protocol           |
| 38 |                        |                      | Alternatively, an explanation of why a DMC is not |                    |
| 39 |                        |                      | needed                                            |                    |
| 40 |                        |                      |                                                   |                    |
| 41 |                        |                      |                                                   |                    |
| 42 |                        |                      |                                                   |                    |
| 43 |                        |                      |                                                   |                    |
| 44 |                        |                      |                                                   |                    |
| 45 |                        |                      |                                                   |                    |
| 46 |                        |                      |                                                   |                    |
| 47 |                        |                      |                                                   |                    |
| 48 |                        |                      |                                                   |                    |
| 49 |                        |                      |                                                   |                    |
| 50 |                        |                      |                                                   |                    |
| 51 | Data monitoring:       | <a href="#">#21b</a> | Description of any interim analyses and stopping  | N/A                |
| 52 | interim analysis       |                      | guidelines, including who will have access to     |                    |
| 53 |                        |                      | these interim results and make the final decision |                    |
| 54 |                        |                      | to terminate the trial                            |                    |
| 55 |                        |                      |                                                   |                    |
| 56 |                        |                      |                                                   |                    |
| 57 |                        |                      |                                                   |                    |
| 58 |                        |                      |                                                   |                    |
| 59 |                        |                      |                                                   |                    |
| 60 |                        |                      |                                                   |                    |



|    |                      |                      |                                                      |          |
|----|----------------------|----------------------|------------------------------------------------------|----------|
| 1  | Harms                | <a href="#">#22</a>  | Plans for collecting, assessing, reporting, and      | Page 11  |
| 2  |                      |                      | managing solicited and spontaneously reported        |          |
| 3  |                      |                      | adverse events and other unintended effects of       |          |
| 4  |                      |                      | trial interventions or trial conduct                 |          |
| 5  |                      |                      |                                                      |          |
| 6  |                      |                      |                                                      |          |
| 7  |                      |                      |                                                      |          |
| 8  |                      |                      |                                                      |          |
| 9  |                      |                      |                                                      |          |
| 10 |                      |                      |                                                      |          |
| 11 | Auditing             | <a href="#">#23</a>  | Frequency and procedures for auditing trial          | Page 12  |
| 12 |                      |                      | conduct, if any, and whether the process will be     |          |
| 13 |                      |                      | independent from investigators and the sponsor       |          |
| 14 |                      |                      |                                                      |          |
| 15 |                      |                      |                                                      |          |
| 16 |                      |                      |                                                      |          |
| 17 |                      |                      |                                                      |          |
| 18 |                      |                      |                                                      |          |
| 19 | <b>Ethics and</b>    |                      |                                                      |          |
| 20 |                      |                      |                                                      |          |
| 21 | <b>dissemination</b> |                      |                                                      |          |
| 22 |                      |                      |                                                      |          |
| 23 |                      |                      |                                                      |          |
| 24 | Research ethics      | <a href="#">#24</a>  | Plans for seeking research ethics committee /        | Page 12  |
| 25 |                      |                      | institutional review board (REC / IRB) approval      |          |
| 26 | approval             |                      |                                                      |          |
| 27 |                      |                      |                                                      |          |
| 28 |                      |                      |                                                      |          |
| 29 | Protocol             | <a href="#">#25</a>  | Plans for communicating important protocol           |          |
| 30 |                      |                      | modifications (eg, changes to eligibility criteria,  |          |
| 31 | amendments           |                      | outcomes, analyses) to relevant parties (eg,         |          |
| 32 |                      |                      | investigators, REC / IRBs, trial participants, trial |          |
| 33 |                      |                      | registries, journals, regulators)                    |          |
| 34 |                      |                      |                                                      |          |
| 35 |                      |                      |                                                      |          |
| 36 |                      |                      |                                                      |          |
| 37 |                      |                      |                                                      |          |
| 38 |                      |                      |                                                      |          |
| 39 |                      |                      |                                                      |          |
| 40 |                      |                      |                                                      |          |
| 41 |                      |                      |                                                      |          |
| 42 | Consent or assent    | <a href="#">#26a</a> | Who will obtain informed consent or assent from      | Page 5-6 |
| 43 |                      |                      | potential trial participants or authorised           |          |
| 44 |                      |                      | surrogates, and how (see Item 32)                    |          |
| 45 |                      |                      |                                                      |          |
| 46 |                      |                      |                                                      |          |
| 47 |                      |                      |                                                      |          |
| 48 |                      |                      |                                                      |          |
| 49 | Consent or assent:   | <a href="#">#26b</a> | Additional consent provisions for collection and     | N/A      |
| 50 |                      |                      | use of participant data and biological specimens     |          |
| 51 | ancillary studies    |                      | in ancillary studies, if applicable                  |          |
| 52 |                      |                      |                                                      |          |
| 53 |                      |                      |                                                      |          |
| 54 |                      |                      |                                                      |          |
| 55 |                      |                      |                                                      |          |
| 56 |                      |                      |                                                      |          |
| 57 |                      |                      |                                                      |          |
| 58 |                      |                      |                                                      |          |
| 59 |                      |                      |                                                      |          |
| 60 |                      |                      |                                                      |          |

|                                                                                                    |                                     |                      |                                                                                                                                                                                                                                                                                     |                                                      |
|----------------------------------------------------------------------------------------------------|-------------------------------------|----------------------|-------------------------------------------------------------------------------------------------------------------------------------------------------------------------------------------------------------------------------------------------------------------------------------|------------------------------------------------------|
| 1<br>2<br>3<br>4<br>5<br>6<br>7<br>8<br>9<br>10                                                    | Confidentiality                     | <a href="#">#27</a>  | How personal information about potential and enrolled participants will be collected, shared, and maintained in order to protect confidentiality before, during, and after the trial                                                                                                | Page 12                                              |
| 11<br>12<br>13<br>14<br>15<br>16<br>17<br>18                                                       | Declaration of interests            | <a href="#">#28</a>  | Financial and other competing interests for principal investigators for the overall trial and each study site                                                                                                                                                                       | Page 14                                              |
| 19<br>20<br>21<br>22<br>23<br>24<br>25<br>26<br>27<br>28                                           | Data access                         | <a href="#">#29</a>  | Statement of who will have access to the final trial dataset, and disclosure of contractual agreements that limit such access for investigators                                                                                                                                     | Page 12                                              |
| 29<br>30<br>31<br>32<br>33<br>34<br>35                                                             | Ancillary and post trial care       | <a href="#">#30</a>  | Provisions, if any, for ancillary and post-trial care, and for compensation to those who suffer harm from trial participation                                                                                                                                                       | Details in protocol – not in paper due to word count |
| 36<br>37<br>38<br>39<br>40<br>41<br>42<br>43<br>44<br>45<br>46<br>47<br>48<br>49<br>50<br>51<br>52 | Dissemination policy: trial results | <a href="#">#31a</a> | Plans for investigators and sponsor to communicate trial results to participants, healthcare professionals, the public, and other relevant groups (eg, via publication, reporting in results databases, or other data sharing arrangements), including any publication restrictions | Page 10 and 12                                       |
| 53<br>54<br>55<br>56<br>57<br>58<br>59<br>60                                                       | Dissemination policy: authorship    | <a href="#">#31b</a> | Authorship eligibility guidelines and any intended use of professional writers                                                                                                                                                                                                      | Page 13                                              |

1 Dissemination [#31c](#) Plans, if any, for granting public access to the full Page 13  
 2  
 3 policy: reproducible protocol, participant-level dataset, and statistical  
 4  
 5 research code  
 6  
 7

## 8 Appendices

9  
 10  
 11  
 12 Informed consent [#32](#) Model consent form and other related Not included  
 13  
 14 materials documentation given to participants and  
 15  
 16 authorised surrogates  
 17  
 18

19  
 20 Biological [#33](#) Plans for collection, laboratory evaluation, and N/A  
 21  
 22 specimens storage of biological specimens for genetic or  
 23  
 24 molecular analysis in the current trial and for  
 25  
 26 future use in ancillary studies, if applicable  
 27  
 28

29  
 30 None The SPIRIT Explanation and Elaboration paper is distributed under the terms of the Creative  
 31  
 32 Commons Attribution License CC-BY-NC. This checklist can be completed online using  
 33  
 34 <https://www.goodreports.org/>, a tool made by the [EQUATOR Network](#) in collaboration with  
 35  
 36 [Penelope.ai](#)  
 37  
 38  
 39  
 40  
 41  
 42  
 43  
 44  
 45  
 46  
 47  
 48  
 49  
 50  
 51  
 52  
 53  
 54  
 55  
 56  
 57  
 58  
 59  
 60
