# Supplementary material for: Prehabilitation in elective patients undergoing cardiac surgery: a randomised control trial (THE PrEPS TRIAL) – a study protocol
Source: PubMed Central journal article supplement — BMJ Open. 2023 Jan 5;13(1):e065992. doi: 10.1136/bmjopen-2022-065992 (PMC9827267; doi:10.1136/bmjopen-2022-065992), 2023-01-05
Supplement: bmjopen-2022-065992supp002.pdf [file bmjopen-2022-065992supp002.pdf]

## QUALITATIVE CONSENT FORM

### Prehabilitation in Elective Patients Undergoing Cardiac Surgery (PrEPS)

Name of Researcher: *Mr Enoch Akowuah*

Participation is entirely optional, and non-participation will have no detrimental effects upon your ongoing care/participation in the primary clinical trial. You are free to withdraw yourself from the sub-study at any point, without any detrimental impact.

**Please read the following statements, initial the boxes next to them and sign below.**

- I have read the patient/HCP information sheet dated .....  
(Version.....) and understand what the PrEPS sub-study entails.
- I consent to my details being passed to and being contacted by the qualitative research team.
- I consent to participate in a focus group.
- I consent to being audio recorded during a focus group.
- I understand that if participating in an online focus group my email address may be visible to other participants
- I consent to the audio of my conversation at said focus group being passed to a professional transcription service.
- I am aware that I may withdraw myself from this sub-study at any time up to and during the focus group and any data already collected will remain in the study.
- I consent to the data generated being anonymised and published for academic purposes.

|  |
|--|
|  |
|  |
|  |
|  |
|  |
|  |
|  |
|  |

|                            |                                      |
|----------------------------|--------------------------------------|
| Print name of participant: | Print name of person taking consent: |
| Signature of participant:  | Signature of person taking consent:  |
| Date:                      |                                      |
